# Supplementary material for: Understanding Xeroderma Pigmentosum Complementation Groups Using Gene Expression Profiling after UV-Light Exposure
Source: Int J Mol Sci. 2015 Jul 14;16(7):15985–96. doi: 10.3390/ijms160715985 (PMC4519934; doi:10.3390/ijms160715985)
Supplement: Supplementary file 1 [file ijms-16-15985-s001.xlsx]

## Sheet: Supp Table 1.txt
Table S1. Altered transcripts after UV-light in control and XP complementation group fibroblasts.
Control	XPA	XPB	XPC	XPD	XPE	XPF	XPG	XPV
NM_152701	NM_003619	NM_007257	NM_002837	NM_003619	NM_016352	NM_004681	NM_001005269	NM_007257
NM_024721	NM_201542	NM_001010000	NM_003759	NM_000222	NM_153685	NM_007257	NM_005499	NM_198719
NM_014917	NM_001002921	NM_003603	NM_152869	NM_030919	NM_000222	NM_018131	NM_020747	NM_021020
NM_030621	NM_002600	NM_152869	NM_201542	NM_207035	NM_033642	NM_021101	NM_016424	NM_015385
NM_001913	NM_003759	NM_005010	NM_004441	NM_005965	NM_201542	NM_012198	NM_052818	NM_003326
NM_004523	NM_016352	NM_002837	NM_001010000	NM_003759	NM_005595	NM_021229	NM_002184	NM_018650
NM_020242	NM_002184	NM_018431	NM_024721	NM_002837	NM_015381	NM_001008	NM_152869	NM_002530
NM_019084	NM_144996	NM_016352	NM_000222	NM_139131	NM_002089	NM_030621	NM_001002921	NM_015097
NM_152750	NM_012120	NM_133494	NM_017786	NM_002380	NM_014715	NM_053276	NM_022831	NM_003619
NM_030816	NM_144982	NM_015381	NM_003619	NM_014917	NM_003619	NM_181077	NM_016262	NM_014839
NM_003759	NM_001759	NM_003759	NM_001002921	NM_016424	NM_173359	NM_012485	NM_170681	NM_012072
NM_145293	NM_003326	NM_080926	NM_016352	NM_015375	NM_015375	NM_033381	NM_002358	NM_002182
NM_001017969	NM_001010000	NM_003619	NM_005126	NM_182707	NM_030756	NM_006210	NM_020962	NM_014872
NM_181077	NM_017736	NM_021230	NM_001024599	NM_020964	NM_003759	NM_014750	NM_005595	NM_207336
NM_206923	NM_005711	NM_015460	NM_000056	NM_001009881	NM_024709	NM_001393	NM_203287	NM_000544
NM_020879	NM_021229	NM_015097	NM_002184	NM_203394	NM_001002921	NM_004523	NM_152750	NM_013282
NM_014518	NM_007257	NM_145037	NM_003711	NM_172037	NM_000387	NM_152414	NM_201542	NM_003860
NM_002380	NM_014572	NM_001226	NM_032246	NM_024945	NM_021020	NM_001025300	NM_017964	NM_005499
NM_002184	NM_181783	NM_013282	NM_001001330	NM_020159	NM_014872	NM_020242	NM_005126	NM_002114
NM_133473	NM_012175	NM_017964	NM_018431	NM_153208	NM_006732	NM_005012	NM_004268	NM_182692
NM_181783	NM_139131	NM_002182	NM_023067	NM_032383	NM_002184	NM_145293	NM_017847	NM_183376
NM_018439	NM_032246	NM_018659	NM_153208	NM_019600	NM_032770	NM_001033506	NM_152265	NM_023943
NM_003238	NM_152869	NM_145869	NM_022086	NM_000387	NM_006245	NM_020964	NM_018356	NM_014572
NM_014421	NM_002310	NM_006727	NM_015385	NM_001002921	NM_003983	NM_152869	NM_018131	NM_138287
NM_198719	NM_173075	NM_002380	NM_005302	NM_004136	NM_175636	NM_032576	NM_017736	NM_001225
NM_001007527	NM_004775	NM_021638	NM_014572	NM_194448	NM_002456	NM_032814	NM_020931	NM_020962
NM_006867	NM_020159	NM_000125	NM_032664	NM_018204	NM_030802	NM_033066	NM_013354	NM_001012987
NM_152551	NM_014709	NM_153809	NM_013355	NM_001260	NM_022086	NM_020947	NM_173826	NM_206999
NM_201252	NM_000321	NM_020768	NM_003860	NM_181831	NM_014484	NM_031418	NM_025209	NM_003711
NM_020425	NM_006074	NM_206999	NM_004225	NM_014709	NM_005632	NM_012364	NM_003774	NM_004225
NM_001006615	NM_016619	NM_182707	NM_015921	NM_002227	NM_014572	NM_138287	NM_032869	NM_145869
NM_014969	NM_000297	NM_004721	NM_022896	NM_007051	NM_152542	NM_173530	NM_002182	NM_020778
NM_006784	NM_003390	NM_201542	NM_019900	NM_003983	NM_001003794	NM_020204	NM_030940	NM_015693
NM_015097	NM_030756	NM_001331	NM_000387	NM_182687	NM_020699	NM_016816	NM_175569	NM_014925
NM_001007559	NM_018323	NM_144646	NM_030756	NM_004850	NM_182687	NM_001147	NM_001226	NM_177433
NM_006506	NM_194292	NM_022116	NM_152619	NM_002078	NM_002600	NM_005045	NM_032770	NM_032773
NM_173808	NM_014577	NM_020297	NM_005652	NM_001017969	NM_015476	NM_198079	NM_018196	NM_003378
NM_004734	NM_000056	NM_183050	NM_002254	NM_005445	NM_015056	NM_177951	NM_017786	NM_006457
NM_021148	NM_016262	NM_002044	NM_033642	NM_004268	NM_004225	NM_133446	NM_016352	NM_015921
NM_014021	NM_022086	NM_005279	NM_014872	NM_152869	NM_020925	NM_032383	NM_173602	NM_002072
NM_014611	NM_002072	NM_031289	NM_020125	NM_025160	NM_002543	NM_014895	NM_000466	NM_003583
NM_032383	NM_002040	NM_018204	NM_020640	NM_005259	NM_002227	NM_080926	NM_145197	NM_033087
NM_004411	NM_018221	NM_001809	NM_014640	NM_006995	NM_152721	NM_017824	NM_018257	NM_024809
NM_032427	NM_025160	NM_022132	NM_007353	NM_015691	NM_170681	NM_024810	NM_024692	NM_006364
NM_153704	NM_014646	NM_001547	NM_014715	NM_021928	NM_007051	NM_173359	NM_006746	NM_005252
NM_015478	NM_198276	NM_006915	NM_018155	NM_015262	NM_002813	NM_017786	NM_021637	NM_022344
NM_017714	NM_031283	NM_000694	NM_014646	NM_018221	NM_133459	NM_004505	NM_002227	NM_017804
NM_002310	NM_004157	NM_153256	NM_139131	NM_030648	NM_005652	NM_145869	NM_019111	NM_000297
NM_015976	NM_152556	NM_147686	NM_015476	NM_020748	NM_021638	NM_005010	NM_001002926	NM_001025107
NM_014895	NM_182692	NM_005965	NM_006732	NM_005126	NM_012236	NM_182499	NM_014917	NM_022086
NM_172212	NM_001010883	NM_175636	NM_013960	NM_003711	NM_003060	NM_052860	NM_020425	NM_024654
NM_020964	NM_005965	NM_000222	NM_018050	NM_001001330	NM_001023565	NM_145037	NM_005302	NM_178517
NM_033029	NM_014888	NM_152721	NM_003355	NM_018131	NM_024625	NM_017669	NM_001892	NM_173491
NM_001018038	NM_152727	NM_005595	NM_021020	NM_201542	NM_007072	NM_014953	NM_144645	NM_153263
NM_024754	NM_020931	NM_017784	NM_012142	NM_014149	NM_183242	NM_022045	NM_001759	NM_173359
NM_007137	NM_001005269	NM_018131	NM_000561	NM_153607	NM_003410	NM_170681	NM_001009881	NM_139283
NM_001002921	NM_175075	NM_177557	NM_018335	NM_004505	NM_003711	NM_033184	NM_015262	NM_004209
NM_013282	NM_024721	NM_005963	NM_152727	NM_178313	NM_145071	NM_176891	NM_012081	NM_012175
NM_152619	NM_183050	NM_005012	NM_001626	NM_004209	NM_005602	NM_005108	NM_012175	NM_014646
NM_000899	NM_020727	NM_021229	NM_182476	NM_007006	NM_033132	NM_194448	NM_018138	NM_032499
NM_018342	NM_003410	NM_183009	NM_012158	NM_001017370	NM_012301	NM_020879	NM_0181170	NM_000862
NM_001005855	NM_004650	NM_014317	NM_005905	NM_145869	NM_019032	NM_0247442	NM_001001483	NM_213598
NM_178548	NM_001017370	NM_173829	NM_006245	NM_032833	NM_021111	NM_181739	NM_025057	NM_001034061
NM_006894	NM_000222	NM_178313	NM_014632	NM_016352	NM_033512	NM_080879	NM_173359	NM_015020
NM_030820	NM_001009881	NM_004415	NM_033102	NM_003583	NM_000544	NM_201252	NM_003506	NM_005057
NM_024935	NM_005499	NM_173666	NM_023923	NM_206999	NM_021783	NM_030649	NM_139207	NM_015328
NM_145037	NM_018981	NM_201631	NM_153226	NM_017736	NM_014646	NM_006611	NM_030756	NM_181831
NM_207436	NM_005859	NM_003033	NM_152829	NM_001913	NM_000297	NM_153223	NM_006364	NM_138967
NM_006915	NM_133494	NM_024947	NM_015328	NM_002645	NM_001005855	NM_198719	NM_020935	NM_015397
NM_198079	NM_001005855	NM_030816	NM_007280	NM_014720	NM_020768	NM_021187	NM_003711	NM_138704
NM_001004461	NM_005154	NM_181805	NM_002227	NM_003390	NM_003034	NM_023073	NM_024590	NM_153208
NM_015018	NM_002227	NM_198276	NM_014720	NM_022831	NM_001002811	NM_022831	NM_006074	NM_171982
NM_001009820	NM_014154	NM_018360	NM_020699	NM_001020825	NM_172037	NM_144689	NM_001153	NM_018290
NM_022065	NM_003238	NM_001011663	NM_015092	NM_002310	NM_021979	NM_183050	NM_014393	NM_004901
NM_006226	NM_024947	NM_172212	NM_198719	NM_025209	NM_005618	NM_002884	NM_003473	NM_015061
NM_001331	NM_201599	NM_138287	NM_007257	NM_016334	NM_002725	NM_006449	NM_001010853	NM_022819
NM_052860	NM_175636	NM_021928	NM_152236	NM_080685	NM_020825	NM_144618	NM_004850	NM_014599
NM_015375	NM_025209	NM_002016	NM_003259	NM_004441	NM_017873	NM_130786	NM_007265	NM_014393
NM_013396	NM_001008844	NM_001884	NM_003506	NM_177947	NM_021213	NM_020717	NM_032383	NM_018983
NM_015381	NM_021629	NM_015170	NM_015124	NM_017964	NM_005153	NM_017784	NM_006572	NM_020699
NM_199045	NM_020962	NM_005915	NM_032787	NM_174858	NM_213598	NM_020702	NM_005153	NM_152265
NM_194292	NM_001380	NM_002358	NM_005965	NM_006074	NM_022098	NM_001005855	NM_153208	NM_006684
NM_148571	NM_020204	NM_003410	NM_181471	NM_001380	NM_018087	NM_019084	NM_002915	NM_024810
NM_032664	NM_033034	NM_030648	NM_014393	NM_032595	NM_003774	NM_001012413	NM_000387	NM_152694
NM_030795	NM_021638	NM_001211	NM_000297	NM_183009	NM_005509	NM_003783	NM_001178	NM_014914
NM_022831	NM_004209	NM_001759	NM_020425	NM_001011663	NM_024102	NM_138278	NM_001547	NM_006074
NM_017613	NM_181831	NM_001815	NM_015375	NM_005859	NM_138300	NM_018248	NM_001001487	NM_006938
NM_172210	NM_001221	NM_005807	NM_001047	NM_001024630	NM_004285	NM_148571	NM_014317	NM_001001787
NM_000609	NM_023067	NM_001005269	NM_001033561	NM_016121	NM_015264	NM_001025108	NM_015423	NM_033259
NM_001932	NM_000252	NM_194292	NM_018638	NM_014147	NM_014709	NM_015478	NM_003355	NM_032831
NM_033379	NM_003342	NM_000056	NM_173523	NM_003794	NM_006801	NM_145044	NM_014154	NM_001892
NM_012485	NM_020909	NM_005139	NM_004157	NM_021111	NM_005057	NM_001736	NM_139283	NM_183009
NM_178344	NM_004234	NM_030621	NM_007265	NM_133646	NM_002358	NM_016105	NM_018170	NM_014577
NM_003619	NM_206999	NM_012301	NM_138967	NM_018323	NM_004101	NM_001018038	NM_012176	NM_002938
NM_006974	NM_001001330	NM_014421	NM_030621	NM_001007535	NM_003749	NM_016374	NM_020195	NM_020964
NM_001025300	NM_003794	NM_004505	NM_172232	NM_016608	NM_023923	NM_003385	NM_014709	NM_032740
NM_002102	NM_015423	NM_007051	NM_181831	NM_018682	NM_138473	NM_138926	NM_020748	NM_145305
NM_003355	NM_001013637	NM_007081	NM_001001557	NM_000297	NM_033102	NM_003524	NM_003794	NM_013943
NM_173829	NM_000387	NM_005573	NM_000350	NM_018335	NM_173515	NM_194252	NM_014572	NM_170681
NM_207035	NM_012330	NM_001080	NM_172037	NM_194327	NM_014720	NM_138400	NM_006036	NM_018356
NM_001018062	NM_001153	NM_014484	NM_014484	NM_006364	NM_194303	NM_016631	NM_032773	NM_203453
NM_016014	NM_018257	NM_017860	NM_003749	NM_030756	NM_018137	NM_152750	NM_153607	NM_001634
NM_134428	NM_182707	NM_001002811	NM_032364	NM_020640	NM_138317	NM_002497	NM_032499	NM_024702
NM_000669	NM_024692	NM_024810	NM_177983	NM_020962	NM_032049	NM_016632	NM_000297	NM_001010984
NM_016105	NM_014715	NM_181676	NM_171982	NM_001001787	NM_018933	NM_207469	NM_002072	NM_000016
NM_173795	NM_020964	NM_006245	NM_025160	NM_014572	NM_203395	NM_153233	NM_177951	NM_014877
NM_194358	NM_203371	NM_177951	NM_001009881	NM_015020	NM_144982	NM_199340	NM_000222	NM_018444
NM_004721	NM_019600	NM_020662	NM_022746	NM_000016	NM_005907	NM_005242	NM_017801	NM_006738
NM_175767	NM_022353	NM_139131	NM_001012239	NM_145305	NM_001759	NM_007168	NM_014011	NM_002456
NM_000694	NM_030979	NM_001006615	NM_020335	NM_021033	NM_004157	NM_001031740	NM_004906	NM_013354
NM_015339	NM_013282	NM_017613	NM_017728	NM_152756	NM_007247	NM_024795	NM_002940	NM_001005409
NM_006540	NM_015262	NM_002184	NM_015381	NM_032869	NM_178124	NM_004118	NM_014268	NM_015335
NM_016619	NM_001001686	NM_014946	NM_002133	NM_020746	NM_018196	NM_203464	NM_018098	NM_004795
NM_001001415	NM_005445	NM_000794	NM_000016	NM_021931	NM_001029999	NM_018953	NM_021033	NM_133263
NM_152445	NM_004225	NM_014969	NM_014709	NM_152542	NM_024665	NM_054031	NM_181783	NM_007247
NM_145869	NM_018444	NM_033554	NM_001178	NM_012142	NM_006593	NM_153498	NM_003918	NM_016322
NM_019846	NM_021101	NM_020962	NM_020194	NM_194358	NM_015541	NM_199123	NM_018050	NM_194358
NM_178826	NM_004972	NM_030919	NM_014849	NM_012158	NM_014877	NM_005532	NM_006153	NM_030940
NM_203464	NM_020959	NM_001913	NM_004630	NM_030621	NM_001031807	NM_030641	NM_152998	NM_030756
NM_001004301	NM_001024630	NM_018518	NM_207462	NM_020699	NM_003342	NM_001023567	NM_005057	NM_001211
NM_017640	NM_012382	NM_005486	NM_153685	NM_002072	NM_033089	NM_024757	NM_003184	NM_001730
NM_033633	NM_012364	NM_170681	NM_004850	NM_001626	NM_014744	NM_000057	NM_001017370	NM_152608
NM_030594	NM_000016	NM_024705	NM_002009	NM_030777	NM_014888	NM_178836	NM_013995	NM_024745
NM_175636	NM_020699	NM_173826	NM_004505	NM_021637	NM_033223	NM_003617	NM_004354	NM_030777
NM_017975	NM_013354	NM_006894	NM_004650	NM_001153	NM_033389	NM_001010871	NM_014632	NM_002858
NM_017799	NM_004411	NM_173075	NM_178836	NM_000702	NM_007157	NM_203382	NM_016608	NM_020748
NM_003419	NM_001938	NM_016619	NM_015018	NM_173602	NM_020209	NM_025198	NM_006245	NM_024947
NM_018356	NM_006133	NM_021120	NM_000544	NM_152240	NM_001730	NM_020960	NM_005410	NM_015172
NM_020962	NM_001008910	NM_016834	NM_177433	NM_004938	NM_033644	NM_144646	NM_001724	NM_001296
NM_014296	NM_001001787	NM_032427	NM_020825	NM_005154	NM_015397	NM_013960	NM_183050	NM_018193
NM_015436	NM_016424	NM_014141	NM_015397	NM_138473	NM_014837	NM_178311	NM_006603	NM_005915
NM_032867	NM_014925	NM_007366	NM_005154	NM_015336	NM_033426	NM_003640	NM_000609	NM_001240
NM_014707	NM_012479	NM_030802	NM_002613	NM_002358	NM_003194	NM_001014291	NM_017714	NM_170744
NM_001007248	NM_005410	NM_012142	NM_015042	NM_002623	NM_017454	NM_032051	NM_005154	NM_005632
NM_006245	NM_022831	NM_005259	NM_000373	NM_005602	NM_198892	NM_001258	NM_005445	NM_005407
NM_024795	NM_014393	NM_014654	NM_019034	NM_014715	NM_001566	NM_003725	NM_139131	NM_017813
NM_005646	NM_001001557	NM_015921	NM_001634	NM_014646	NM_080797	NM_007137	NM_032844	NM_001380
NM_207577	NM_015203	NM_033128	NM_024590	NM_181471	NM_014563	NM_206854	NM_031216	NM_001005855
NM_005012	NM_152608	NM_152542	NM_006994	NM_024672	NM_022106	NM_004445	NM_006916	NM_015124
NM_024786	NM_020879	NM_145698	NM_004035	NM_003473	NM_152909	NM_015557	NM_015336	NM_053053
NM_080282	NM_007006	NM_004318	NM_002053	NM_001001487	NM_001018003	NM_001031741	NM_005230	NM_207577
NM_007250	NM_152221	NM_004934	NM_181876	NM_014936	NM_031205	NM_153217	NM_033410	NM_006817
NM_020768	NM_018196	NM_152556	NM_030594	NM_002040	NM_182664	NM_000530	NM_018155	NM_006572
NM_005599	NM_014399	NM_002053	NM_153742	NM_014421	NM_019885	NM_001013722	NM_177947	NM_139207
NM_152384	NM_021033	NM_004093	NM_012224	NM_013995	NM_022132	NM_004673	NM_018846	NM_001033561
NM_022145	NM_006572	NM_014632	NM_018287	NM_004253	NM_014393	NM_006862	NM_015020	NM_004286
NM_001226	NM_182476	NM_001850	NM_002182	NM_024590	NM_001009814	NM_152412	NM_001018102	NM_145753
NM_014572	NM_001025300	NM_003764	NM_152834	NM_017784	NM_017714	NM_014907	NM_003860	NM_173824
NM_002053	NM_171982	NM_152750	NM_014268	NM_006756	NM_152240	NM_138290	NM_194331	NM_024091
NM_017824	NM_004516	NM_001875	NM_001029882	NM_006572	NM_006346	NM_024680	NM_018076	NM_016608
NM_170681	NM_001004067	NM_018050	NM_145305	NM_020204	NM_014154	NM_001008737	NM_003390	NM_006449
NM_145044	NM_018287	NM_020964	NM_003185	NM_002522	NM_198336	NM_005924	NM_005800	NM_014774
NM_018654	NM_015443	NM_005336	NM_000801	NM_003749	NM_133262	NM_002104	NM_001006683	NM_145858
NM_015901	NM_015092	NM_016125	NM_203371	NM_182541	NM_020210	NM_203307	NM_002638	NM_022843
NM_012198	NM_194439	NM_032622	NM_006364	NM_004157	NM_005841	NM_080614	NM_007246	NM_152701
NM_005739	NM_006915	NM_058237	NM_014793	NM_001759	NM_000770	NM_014648	NM_001010000	NM_015476
NM_024037	NM_002182	NM_024721	NM_016018	NM_003791	NM_005772	NM_006657	NM_001225	NM_000950
NM_152382	NM_004187	NM_018015	NM_005632	NM_001530	NM_022130	NM_018996	NM_013282	NM_020853
NM_033343	NM_007005	NM_000899	NM_033410	NM_014109	NM_023067	NM_178276	NM_030936	NM_138639
NM_005711	NM_001025199	NM_004975	NM_033512	NM_001013637	NM_016580	NM_018155	NM_005915	NM_030594
NM_014789	NM_018155	NM_001018159	NM_014815	NM_000882	NM_001853	NM_021097	NM_014563	NM_001001922
NM_176891	NM_153208	NM_173515	NM_006147	NM_080926	NM_014693	NM_031297	NM_003749	NM_181783
NM_004617	NM_007246	NM_017714	NM_030796	NM_001004286	NM_003309	NM_019903	NM_021111	NM_183050
NM_014154	NM_005509	NM_001010984	NM_207309	NM_001892	NM_005968	NM_032146	NM_152608	NM_004979
NM_001717	NM_015713	NM_012198	NM_152882	NM_005230	NM_001030078	NM_015381	NM_014923	NM_177963
NM_178517	NM_015375	NM_177983	NM_145119	NM_152909	NM_033222	NM_021628	NM_130809	NM_004850
NM_012360	NM_006603	NM_001003794	NM_001006615	NM_153341	NM_001009881	NM_177442	NM_024721	NM_203464
NM_015020	NM_017786	NM_033358	NM_183050	NM_000252	NM_000368	NM_201595	NM_000016	NM_031492
NM_194313	NM_005153	NM_015617	NM_003764	NM_003506	NM_014829	NM_001002921	NM_080926	NM_001007535
NM_013347	NM_004268	NM_014461	NM_021033	NM_013354	NM_003326	NM_001008537	NM_002053	NM_014837
NM_002044	NM_031157	NM_006756	NM_000612	NM_022086	NM_006371	NM_006892	NM_022373	NM_006091
NM_001001786	NM_153485	NM_001260	NM_138958	NM_002267	NM_182560	NM_020893	NM_005733	NM_025160
NM_024831	NM_019032	NM_005302	NM_015423	NM_182706	NM_001001487	NM_173645	NM_172037	NM_004906
NM_022045	NM_001013638	NM_052906	NM_000168	NM_021252	NM_003184	NM_014936	NM_001221	NM_016334
NM_033358	NM_015172	NM_032146	NM_001004067	NM_153261	NM_022483	NM_002285	NM_033034	NM_004285
NM_003672	NM_016516	NM_015061	NM_018953	NM_025069	NM_005248	NM_052906	NM_015397	NM_014109
NM_032622	NM_014839	NM_000885	NM_017736	NM_018155	NM_001224	NM_152571	NM_001634	NM_001938
NM_138639	NM_012142	NM_007005	NM_033426	NM_015044	NM_144996	NM_001007524	NM_032810	NM_033133
NM_133459	NM_024590	NM_018138	NM_024430	NM_015144	NM_000390	NM_144709	NM_033426	NM_015092
NM_006475	NM_004101	NM_182692	NM_001017969	NM_004728	NM_012286	NM_020326	NM_053055	NM_152902
NM_016315	NM_173510	NM_007323	NM_003473	NM_020784	NM_198693	NM_001015049	NM_207337	NM_005859
NM_016488	NM_005057	NM_032246	NM_015481	NM_194278	NM_145034	NM_001475	NM_014925	NM_001025252
NM_020699	NM_018138	NM_080752	NM_002906	NM_020245	NM_002996	NM_018935	NM_173510	NM_183006
NM_001018009	NM_001634	NM_001004306	NM_012286	NM_016230	NM_014458	NM_022445	NM_018287	NM_005240
NM_033381	NM_001730	NM_001031693	NM_014363	NM_002613	NM_002906	NM_025002	NM_003410	NM_000193
NM_024796	NM_014822	NM_198243	NM_024654	NM_201629	NM_015018	NM_004657	NM_014242	NM_015144
NM_001875	NM_002705	NM_033634	NM_177989	NM_005711	NM_001006665	NM_000490	NM_014774	NM_001739
NM_019903	NM_021145	NM_152647	NM_014992	NM_003082	NM_207337	NM_153215	NM_015691	NM_004836
NM_152889	NM_019900	NM_001001787	NM_021111	NM_198892	NM_152437	NM_001005513	NM_153377	NM_015617
NM_004316	NM_004728	NM_032051	NM_014370	NM_022836	NM_015336	NM_032679	NM_080422	NM_181875
NM_152290	NM_005907	NM_030594	NM_182699	NM_130809	NM_001032280	NM_004080	NM_006721	NM_020926
NM_024770	NM_145802	NM_080607	NM_002334	NM_152834	NM_015460	NM_003931	NM_018351	NM_003749
NM_203292	NM_012113	NM_001001715	NM_002645	NM_173654	NM_207036	NM_018470	NM_016586	NM_017801
NM_006873	NM_032383	NM_194358	NM_006572	NM_194314	NM_177989	NM_181617	NM_015092	NM_006821
NM_178311	NM_033644	NM_015910	NM_014822	NM_002184	NM_006532	NM_145807	NM_002600	NM_052858
NM_002146	NM_001001487	NM_032770	NM_001001787	NM_006153	NM_133263	NM_002505	NM_021213	NM_020141
NM_001024455	NM_012319	NM_198887	NM_001010856	NM_001067	NM_152519	NM_145282	NM_002271	NM_152882
NM_020633	NM_003473	NM_007353	NM_020727	NM_003112	NM_173510	NM_005965	NM_022133	NM_024638
NM_152842	NM_014720	NM_017786	NM_025158	NM_002451	NM_013354	NM_022369	NM_021928	NM_178037
NM_173086	NM_014877	NM_016831	NM_004129	NM_017813	NM_153361	NM_000892	NM_001007535	NM_021942
NM_032578	NM_018682	NM_003431	NM_015443	NM_012382	NM_003670	NM_144648	NM_001380	NM_014676
NM_004850	NM_145034	NM_175884	NM_207577	NM_018196	NM_138958	NM_031912	NM_001431	NM_207375
NM_001082	NM_013943	NM_194448	NM_152240	NM_005124	NM_001015047	NM_001099	NM_152780	NM_020346
NM_006398	NM_003506	NM_012236	NM_033396	NM_139207	NM_017453	NM_175920	NM_014888	NM_007041
NM_018194	NM_005124	NM_014147	NM_024102	NM_016072	NM_014822	NM_005519	NM_015251	NM_006653
NM_002637	NM_182541	NM_025052	NM_005859	NM_173359	NM_018108	NM_014470	NM_014715	NM_033378
NM_001012264	NM_001904	NM_000693	NM_020807	NM_014458	NM_019035	NM_032961	NM_016239	NM_003507
NM_003838	NM_014872	NM_152445	NM_005491	NM_004411	NM_001005217	NM_207484	NM_012382	NM_006391
NM_145341	NM_015336	NM_001002921	NM_018087	NM_024091	NM_021942	NM_003265	NM_003619	NM_003034
NM_001759	NM_003860	NM_001024455	NM_001017965	NM_003326	NM_003873	NM_013282	NM_015097	NM_003013
NM_020947	NM_021111	NM_005159	NM_020925	NM_002588	NM_017563	NM_014893	NM_020245	NM_003844
NM_001884	NM_032810	NM_007045	NM_015172	NM_175569	NM_001009880	NM_001017991	NM_001025107	NM_145286
NM_182621	NM_020245	NM_021637	NM_001001487	NM_001634	NM_015094	NM_001324	NM_022154	NM_006022
NM_033109	NM_007345	NM_019084	NM_001138	NM_001291	NM_001025489	NM_033001	NM_139135	NM_016340
NM_033418	NM_020651	NM_182909	NM_001009880	NM_152282	NM_005643	NM_018713	NM_001024630	NM_130434
NM_172037	NM_003711	NM_004370	NM_004368	NM_013943	NM_003794	NM_182525	NM_002786	NM_006153
NM_181717	NM_032373	NM_001011658	NM_021979	NM_003831	NM_153613	NM_001018009	NM_014822	NM_001010883
NM_206854	NM_020748	NM_181831	NM_014925	NM_003670	NM_020245	NM_022169	NM_030777	NM_032120
NM_018676	NM_016586	NM_203371	NM_006133	NM_152221	NM_198907	NM_145697	NM_021942	NM_030918
NM_171982	NM_001001556	NM_001700	NM_014888	NM_014877	NM_006646	NM_003722	NM_130434	NM_020984
NM_016631	NM_021213	NM_033637	NM_003013	NM_017786	NM_017801	NM_201631	NM_012198	NM_032532
NM_018498	NM_014666	NM_001018003	NM_017787	NM_022483	NM_014676	NM_001014450	NM_013262	NM_004643
NM_014880	NM_016952	NM_139201	NM_138300	NM_033379	NM_000252	NM_001010861	NM_014109	NM_016626
NM_144620	NM_173547	NM_053276	NM_005772	NM_007246	NM_014873	NM_005069	NM_001981	NM_153377
NM_005279	NM_015061	NM_005968	NM_015203	NM_022106	NM_001474	NM_001136	NM_002835	NM_024725
NM_014877	NM_020239	NM_001003396	NM_144642	NM_014925	NM_005252	NM_003189	NM_005782	NM_001397
NM_001001556	NM_203406	NM_001221	NM_001892	NM_016626	NM_005859	NM_001010876	NM_005513	NM_032856
NM_014839	NM_021140	NM_004209	NM_001001715	NM_144997	NM_017813	NM_207645	NM_024754	NM_153357
NM_003931	NM_006479	NM_002036	NM_015465	NM_014317	NM_176791	NM_003320	NM_024945	NM_178167
NM_001010982	NM_014706	NM_012084	NM_021928	NM_024935	NM_015368	NM_145865	NM_020738	NM_022130
NM_015151	NM_013995	NM_030756	NM_020245	NM_001010883	NM_139207	NM_004230	NM_005536	NM_178500
NM_030625	NM_007269	NM_032383	NM_005057	NM_006245	NM_213589	NM_004963	NM_015144	NM_005889
NM_021180	NM_018249	NM_080745	NM_182541	NM_001023570	NM_173473	NM_005725	NM_014676	NM_007246
NM_031957	NM_018527	NM_031957	NM_002016	NM_012224	NM_001012733	NM_016839	NM_152240	NM_018846
NM_172311	NM_024612	NM_005569	NM_003342	NM_172212	NM_000610	NM_001031729	NM_052942	NM_002053
NM_031218	NM_144632	NM_001007524	NM_003238	NM_000899	NM_130809	NM_002034	NM_032740	NM_032810
NM_001005192	NM_001023570	NM_033191	NM_007051	NM_006210	NM_017619	NM_002760	NM_058216	NM_005230
NM_018983	NM_020388	NM_004516	NM_021213	NM_001904	NM_018348	NM_020633	NM_152902	NM_020245
NM_144973	NM_004850	NM_004483	NM_003012	NM_007249	NM_001012417	NM_001004702	NM_005652	NM_005602
NM_144648	NM_170681	NM_024692	NM_138343	NM_177951	NM_153826	NM_144706	NM_016230	NM_018965
NM_001033556	NM_004075	NM_004445	NM_004821	NM_002637	NM_152458	NM_017447	NM_016334	NM_145810
NM_004225	NM_145305	NM_006219	NM_020748	NM_030816	NM_145808	NM_130390	NM_006080	NM_174873
NM_018590	NM_004286	NM_000702	NM_024625	NM_012124	NM_152238	NM_020178	NM_007005	NM_032842
NM_001012413	NM_030936	NM_002600	NM_012236	NM_004617	NM_015144	NM_000669	NM_001769	NM_032869
NM_018423	NM_005012	NM_153020	NM_005509	NM_024430	NM_016626	NM_012285	NM_152705	NM_023076
NM_020818	NM_198720	NM_001005855	NM_000190	NM_005099	NM_198139	NM_000073	NM_020886	NM_197957
NM_003060	NM_021637	NM_022164	NM_005252	NM_145808	NM_012395	NM_024010	NM_139321	NM_182631
NM_173359	NM_024584	NM_004136	NM_145802	NM_015443	NM_013943	NM_138791	NM_021145	NM_205836
NM_194439	NM_003082	NM_001626	NM_003615	NM_006916	NM_007249	NM_001082	NM_002938	NM_020879
NM_012236	NM_213604	NM_152629	NM_020892	NM_001331	NM_002454	NM_133437	NM_152829	NM_022436
NM_000522	NM_014969	NM_005934	NM_001331	NM_152265	NM_032842	NM_004616	NM_144981	NM_001999
NM_000613	NM_015921	NM_052887	NM_004901	NM_152608	NM_001547	NM_001001317	NM_145297	NM_024953
NM_013368	NM_138473	NM_002136	NM_018669	NM_007269	NM_206854	NM_002785	NM_005965	NM_031913
NM_001017406	NM_000610	NM_006475	NM_001853	NM_000544	NM_001938	NM_017490	NM_007157	NM_016230
NM_178169	NM_173359	NM_078476	NM_198276	NM_001033561	NM_001012978	NM_001032409	NM_021814	NM_181656
NM_007068	NM_133646	NM_020947	NM_144981	NM_005137	NM_002991	NM_178499	NM_004109	NM_000846
NM_015210	NM_018348	NM_018843	NM_153240	NM_133459	NM_181442	NM_173846	NM_000110	NM_020182
NM_031912	NM_030777	NM_014715	NM_007247	NM_032842	NM_006359	NM_181654	NM_018444	NM_178154
NM_019032	NM_022130	NM_003064	NM_001024460	NM_000056	NM_000702	NM_004485	NM_002044	NM_033128
NM_130385	NM_003983	NM_025004	NM_003390	NM_018444	NM_002940	NM_198545	NM_012142	NM_007190
NM_133468	NM_015056	NM_002227	NM_018316	NM_032773	NM_017416	NM_024628	NM_015065	NM_206909
NM_182515	NM_024929	NM_198849	NM_005444	NM_015257	NM_007246	NM_001013621	NM_001247	NM_019111
NM_001029880	NM_005973	NM_175569	NM_003410	NM_201442	NM_004458	NM_001001927	NM_004617	NM_020706
NM_173830	NM_017787	NM_002254	NM_019032	NM_002247	NM_024941	NM_173573	NM_024091	NM_031933
NM_176887	NM_020825	NM_033633	NM_012319	NM_130434	NM_002892	NM_032054	NM_014720	NM_198276
NM_145018	NM_001178	NM_181679	NM_020718	NM_001001556	NM_021818	NM_001271	NM_144646	NM_005126
NM_178313	NM_015328	NM_004902	NM_020774	NM_032246	NM_004973	NM_145018	NM_018103	NM_019885
NM_005231	NM_005764	NM_031935	NM_021870	NM_176824	NM_014951	NM_182579	NM_030759	NM_001001701
NM_170606	NM_0181170	NM_000373	NM_014858	NM_001938	NM_031284	NM_001005566	NM_182648	NM_022759
NM_030919	NM_016608	NM_018647	NM_000493	NM_025138	NM_080926	NM_183238	NM_018159	NM_033480
NM_000544	NM_001033561	NM_199123	NM_006387	NM_006603	NM_016424	NM_001005186	NM_030979	NM_021111
NM_002543	NM_002875	NM_018194	NM_178313	NM_022124	NM_004728	NM_001006630	NM_002581	NM_030923
NM_003784	NM_203304	NM_139246	NM_207035	NM_014153	NM_007006	NM_207503	NM_133646	NM_001005504
NM_032499	NM_001001715	NM_001012987	NM_018323	NM_015397	NM_175910	NM_015429	NM_012124	NM_022158
NM_173670	NM_032783	NM_022746	NM_018159	NM_005646	NM_177966	NM_006177	NM_016072	NM_152683
NM_018196	NM_024091	NM_021629	NM_018221	NM_004973	NM_014839	NM_032501	NM_014666	NM_002581
NM_014654	NM_145869	NM_001013624	NM_014837	NM_181442	NM_012287	NM_001010887	NM_006938	NM_003957
NM_021637	NM_152240	NM_022353	NM_014149	NM_023067	NM_032845	NM_003064	NM_145808	NM_019014
NM_007247	NM_001003680	NM_004368	NM_213589	NM_001004067	NM_015130	NM_024552	NM_015554	NM_001200
NM_022901	NM_194448	NM_001014451	NM_152909	NM_000947	NM_004075	NM_002456	NM_022896	NM_007131
NM_149379	NM_018149	NM_139013	NM_017896	NM_002349	NM_138821	NM_173609	NM_005638	NM_194292
NM_203466	NM_198396	NM_080664	NM_001005409	NM_002813	NM_153375	NM_022963	NM_018323	NM_007334
NM_152412	NM_002334	NM_139165	NM_015262	NM_183376	NM_018190	NM_014989	NM_152909	NM_178025
NM_133646	NM_001047	NM_001017406	NM_020443	NM_005012	NM_015596	NM_001003396	NM_001257	NM_020443
NM_153613	NM_006245	NM_003784	NM_181725	NM_002136	NM_018846	NM_001010905	NM_004318	NM_004458
NM_194259	NM_002637	NM_022896	NM_007249	NM_006080	NM_003462	NM_000397	NM_0247442	NM_006717
NM_032264	NM_032427	NM_016014	NM_001012421	NM_017958	NM_005491	NM_004321	NM_016343	NM_152596
NM_031905	NM_145686	NM_001008844	NM_002813	NM_020195	NM_153261	NM_001007538	NM_144689	NM_002048
NM_017631	NM_139207	NM_022831	NM_006609	NM_004456	NM_175856	NM_001008895	NM_016121	NM_133646
NM_005373	NM_001007524	NM_030967	NM_030952	NM_183050	NM_003507	NM_198956	NM_001012414	NM_054012
NM_198321	NM_018335	NM_198900	NM_145686	NM_000189	NM_022909	NM_001005373	NM_198276	NM_138609
NM_000369	NM_001855	NM_017534	NM_014969	NM_198066	NM_030918	NM_002784	NM_001007069	NM_213604
NM_153357	NM_033410	NM_152834	NM_003392	NM_030940	NM_001031685	NM_001005521	NM_032270	NM_173044
NM_015642	NM_024558	NM_014109	NM_001017370	NM_015381	NM_133370	NM_002010	NM_014098	NM_014223
NM_016441	NM_181471	NM_138980	NM_152408	NM_012286	NM_153264	NM_080859	NM_019006	NM_144973
NM_198504	NM_130809	NM_170773	NM_014923	NM_145794	NM_021233	NM_017964	NM_003326	NM_004072
NM_001008844	NM_014661	NM_024908	NM_005153	NM_182697	NM_001704	NM_030674	NM_003594	NM_199161
NM_004938	NM_021818	NM_001025930	NM_001018071	NM_020738	NM_005904	NM_018295	NM_006379	NM_005905
NM_080797	NM_004643	NM_003774	NM_138993	NM_015565	NM_014743	NM_001005177	NM_016626	NM_198074
NM_018999	NM_000168	NM_002240	NM_032740	NM_175636	NM_005171	NM_001548	NM_006206	NM_152905
NM_000390	NM_016121	NM_173795	NM_006074	NM_002030	NM_012238	NM_144645	NM_182585	NM_020690
NM_007018	NM_014632	NM_032264	NM_003844	NM_001993	NM_024558	NM_007036	NM_001530	NM_005443
NM_016216	NM_001002811	NM_178169	NM_017804	NM_014735	NM_022113	NM_144994	NM_004728	NM_024518
NM_002786	NM_002392	NM_145044	NM_005934	NM_003355	NM_015868	NM_006235	NM_178154	NM_213589
NM_016613	NM_201442	NM_001018040	NM_006725	NM_013390	NM_202000	NM_001005852	NM_002267	NM_175569
NM_006212	NM_030759	NM_016488	NM_199482	NM_014577	NM_001011663	NM_025202	NM_016548	NM_002529
NM_016400	NM_000189	NM_213604	NM_019035	NM_172193	NM_006206	NM_000544	NM_002264	NM_000153
NM_014903	NM_201631	NM_007331	NM_023915	NM_016083	NM_001012988	NM_183376	NM_005398	NM_024861
NM_013262	NM_024665	NM_001879	NM_014353	NM_021818	NM_013254	NM_152404	NM_004458	NM_033512
NM_153018	NM_001530	NM_001006657	NM_013354	NM_025208	NM_005955	NM_025041	NM_017784	NM_021033
NM_175720	NM_004906	NM_014903	NM_018138	NM_207318	NM_014943	NM_012128	NM_021217	NM_001980
NM_022103	NM_006511	NM_005733	NM_024773	NM_015328	NM_006572	NM_004081	NM_001001556	NM_173640
NM_183075	NM_152829	NM_014917	NM_145804	NM_080660	NM_153344	NM_152523	NM_015328	NM_006718
NM_017644	NM_000950	NM_052943	NM_178169	NM_017454	NM_198243	NM_080739	NM_015176	NM_207484
NM_001431	NM_145804	NM_003326	NM_005602	NM_182648	NM_004730	NM_003318	NM_018638	NM_001029882
NM_025113	NM_017804	NM_003783	NM_018196	NM_015079	NM_133646	NM_020142	NM_001005409	NM_001001557
NM_145858	NM_012158	NM_013364	NM_145808	NM_021213	NM_001356	NM_144687	NM_032842	NM_006256
NM_021942	NM_207337	NM_030906	NM_018099	NM_015921	NM_003392	NM_001001548	NM_001009555	NM_017958
NM_000351	NM_014574	NM_004866	NM_130809	NM_002392	NM_004329	NM_004653	NM_025160	NM_006386
NM_003052	NM_001001664	NM_152665	NM_030802	NM_173515	NM_001024668	NM_031854	NM_080660	NM_024612
NM_031844	NM_024814	NM_002782	NM_014399	NM_002334	NM_004093	NM_144721	NM_177989	NM_020807
NM_020443	NM_002915	NM_198474	NM_006452	NM_003184	NM_021928	NM_080629	NM_006415	NM_002185
NM_153377	NM_005602	NM_019061	NM_017780	NM_014632	NM_017828	NM_152684	NM_000902	NM_152310
NM_024993	NM_004320	NM_024621	NM_019892	NM_004035	NM_021943	NM_002462	NM_012319	NM_080621
NM_014011	NM_153025	NM_203464	NM_152265	NM_000331	NM_004297	NM_024902	NM_183376	NM_022122
NM_207396	NM_007157	NM_005422	NM_002915	NM_181701	NM_002581	NM_001884	NM_015058	NM_182487
NM_002508	NM_005032	NM_024882	NM_033644	NM_014774	NM_021102	NM_003618	NM_022103	NM_015382
NM_025138	NM_153377	NM_001025468	NM_139135	NM_014898	NM_006603	NM_003122	NM_001005323	NM_001004067
NM_001001436	NM_019083	NM_001006947	NM_025080	NM_012479	NM_017958	NM_021154	NM_003392	NM_001009881
NM_021186	NM_018356	NM_001029	NM_006916	NM_018351	NM_001006947	NM_030795	NM_153240	NM_005667
NM_003927	NM_003185	NM_018196	NM_006500	NM_024654	NM_198956	NM_004731	NM_153263	NM_130835
NM_031283	NM_145071	NM_020416	NM_152523	NM_002182	NM_001253	NM_018080	NM_181442	NM_152240
NM_006718	NM_015339	NM_174858	NM_201629	NM_144695	NM_023930	NM_001009881	NM_023923	NM_018439
NM_006449	NM_001009814	NM_004543	NM_153042	NM_133494	NM_002040	NM_032499	NM_014454	NM_002334
NM_178232	NM_172212	NM_002508	NM_003583	NM_014035	NM_015044	NM_030967	NM_018193	NM_000609
NM_001010891	NM_018050	NM_194313	NM_080645	NM_183075	NM_006892	NM_022168	NM_022838	NM_018200
NM_033425	NM_001005747	NM_006718	NM_006815	NM_014666	NM_003687	NM_024505	NM_015161	NM_198968
NM_014721	NM_006457	NM_004630	NM_006748	NM_005934	NM_002508	NM_001775	NM_033644	NM_199074
NM_014023	NM_198120	NM_014693	NM_144695	NM_007362	NM_173552	NM_016817	NM_006821	NM_018323
NM_001017962	NM_007051	NM_003860	NM_153607	NM_003185	NM_020706	NM_014951	NM_022899	NM_018263
NM_024613	NM_177947	NM_004657	NM_006036	NM_152437	NM_000276	NM_194449	NM_197941	NM_014674
NM_138270	NM_015176	NM_014606	NM_014697	NM_002467	NM_172373	NM_014791	NM_005746	NM_005782
NM_015383	NM_003583	NM_012167	NM_015999	NM_138782	NM_014711	NM_002078	NM_012257	NM_012319
NM_005338	NM_020194	NM_147150	NM_001982	NM_018027	NM_003270	NM_078487	NM_015481	NM_194431
NM_182697	NM_005782	NM_019050	NM_005445	NM_024917	NM_013402	NM_015092	NM_012286	NM_005542
NM_181725	NM_030796	NM_080723	NM_181442	NM_194292	NM_005444	NM_015170	NM_022902	NM_004516
NM_018138	NM_003114	NM_080628	NM_001001686	NM_001008393	NM_013995	NM_000582	NM_000950	NM_013995
NM_006421	NM_012238	NM_015261	NM_016651	NM_002102	NM_000158	NM_006379	NM_152405	NM_012286
NM_033133	NM_021928	NM_002543	NM_153025	NM_198276	NM_000108	NM_001013406	NM_003583	NM_003342
NM_080660	NM_006147	NM_006994	NM_016262	NM_001001686	NM_001001670	NM_181803	NM_001334	NM_013362
NM_138287	NM_006995	NM_005532	NM_020149	NM_020825	NM_152705	NM_000231	NM_001356	NM_003309
NM_0181170	NM_001247	NM_018696	NM_017813	NM_018257	NM_021975	NM_003633	NM_014795	NM_002945
NM_152829	NM_014011	NM_006379	NM_173547	NM_015285	NM_001431	NM_005933	NM_006873	NM_004075
NM_014606	NM_003034	NM_000220	NM_001001483	NM_178517	NM_002874	NM_181740	NM_021229	NM_017994
NM_175918	NM_015186	NM_024091	NM_002827	NM_002600	NM_004643	NM_007125	NM_001762	NM_003506
NM_199176	NM_183075	NM_172037	NM_024929	NM_014606	NM_000230	NM_024754	NM_004822	NM_014747
NM_001009814	NM_139283	NM_207323	NM_173602	NM_003342	NM_004974	NM_144967	NM_012238	NM_001002841
NM_007347	NM_175569	NM_130385	NM_015336	NM_017801	NM_007361	NM_080660	NM_207012	NM_018847
NM_014774	NM_145284	NM_002514	NM_032813	NM_007005	NM_172212	NM_207465	NM_002906	NM_005137
NM_133263	NM_177433	NM_198321	NM_177423	NM_000610	NM_032287	NM_013961	NM_001980	NM_032391
NM_022445	NM_000493	NM_018983	NM_018095	NM_006415	NM_007192	NM_031218	NM_017813	NM_015110
NM_138571	NM_213598	NM_005639	NM_058195	NM_015172	NM_005780	NM_000381	NM_017943	NM_017664
NM_007034	NM_177441	NM_014272	NM_004423	NM_018170	NM_031246	NM_001008396	NM_020892	NM_018182
NM_015203	NM_002543	NM_015210	NM_007362	NM_014815	NM_004432	NM_001001396	NM_198699	NM_018303
NM_080645	NM_018182	NM_198699	NM_153377	NM_032740	NM_016230	NM_016441	NM_005491	NM_005044
NM_170773	NM_006635	NM_015361	NM_001452	NM_022838	NM_152608	NM_012242	NM_020921	NM_130446
NM_015285	NM_022131	NM_004274	NM_005733	NM_005652	NM_004521	NM_021804	NM_020194	NM_181869
NM_001031700	NM_022483	NM_022783	NM_004169	NM_139321	NM_015099	NM_001013005	NM_021629	NM_006038
NM_001980	NM_001334	NM_173359	NM_032869	NM_024725	NM_030777	NM_032844	NM_015172	NM_020348
NM_000459	NM_001008711	NM_002875	NM_133646	NM_032783	NM_138782	NM_004713	NM_145802	NM_033083
NM_016831	NM_002044	NM_006682	NM_006206	NM_014822	NM_198401	NM_001259	NM_006646	NM_001724
NM_152511	NM_022778	NM_145119	NM_018933	NM_153240	NM_004893	NM_024563	NM_004423	NM_207012
NM_145034	NM_000530	NM_001003676	NM_005124	NM_016169	NM_006091	NM_019032	NM_153706	NM_198066
NM_052913	NM_022116	NM_201648	NM_001707	NM_205768	NM_012479	NM_018076	NM_007051	NM_020777
NM_015522	NM_016230	NM_002725	NM_005078	NM_033358	NM_020375	NM_014616	NM_001015509	NM_014810
NM_006055	NM_019593	NM_144995	NM_016626	NM_145034	NM_017943	NM_018062	NM_014223	NM_012291
NM_194301	NM_018846	NM_006569	NM_006821	NM_023039	NM_001198	NM_175636	NM_006738	NM_004995
NM_016575	NM_018953	NM_002897	NM_014577	NM_006379	NM_005458	NM_006751	NM_021818	NM_018103
NM_006823	NM_003113	NM_006074	NM_176824	NM_006036	NM_198830	NM_020792	NM_005032	NM_014795
NM_004447	NM_033426	NM_018279	NM_018907	NM_194439	NM_004302	NM_002849	NM_013240	NM_020792
NM_003588	NM_020738	NM_144985	NM_018846	NM_033644	NM_020162	NM_002227	NM_000610	NM_016316
NM_032832	NM_006387	NM_032958	NM_003918	NM_016604	NM_002859	NM_013451	NM_203453	NM_003831
NM_014149	NM_018638	NM_007072	NM_005458	NM_152727	NM_020120	NM_015020	NM_005509	NM_152678
NM_000908	NM_006938	NM_003748	NM_001005269	NM_000891	NM_201264	NM_003774	NM_022130	NM_031372
NM_001025356	NM_001003794	NM_024590	NM_152437	NM_018050	NM_001365	NM_020748	NM_004249	NM_138300
NM_213604	NM_002578	NM_006366	NM_007246	NM_018569	NM_001992	NM_001013714	NM_201997	NM_032832
NM_001030050	NM_024636	NM_152829	NM_032264	NM_000110	NM_019843	NM_002271	NM_181656	NM_001761
NM_005724	NM_020947	NM_207462	NM_001794	NM_002752	NM_213655	NM_016334	NM_001938	NM_014838
NM_153373	NM_181840	NM_005491	NM_004627	NM_006209	NM_001001933	NM_001753	NM_021820	NM_005188
NM_018991	NM_001001483	NM_006867	NM_024692	NM_005907	NM_000877	NM_052813	NM_145794	NM_006252
NM_013374	NM_004458	NM_022138	NM_024875	NM_003101	NM_005513	NM_020890	NM_001008910	NM_003713
NM_138429	NM_005899	NM_001031679	NM_033034	NM_000220	NM_003022	NM_020914	NM_000153	NM_032961
NM_133446	NM_178313	NM_175887	NM_144997	NM_003844	NM_006038	NM_004336	NM_006994	NM_014153
NM_025154	NM_001033047	NM_020379	NM_003617	NM_001461	NM_170773	NM_000599	NM_145716	NM_000945
NM_025069	NM_018999	NM_031283	NM_003528	NM_152409	NM_020738	NM_194325	NM_022482	NM_152221
NM_033331	NM_005407	NM_005444	NM_004268	NM_004225	NM_002827	NM_144975	NM_004973	NM_015361
NM_058169	NM_139321	NM_001962	NM_001397	NM_006718	NM_001001701	NM_006444	NM_001439	NM_017534
NM_001018089	NM_173637	NM_177553	NM_145716	NM_145802	NM_002518	NM_015892	NM_001020825	NM_005520
NM_199126	NM_015044	NM_015107	NM_003738	NM_0181170	NM_170750	NM_152913	NM_001005354	NM_173473
NM_001085	NM_025154	NM_003931	NM_005137	NM_004650	NM_133265	NM_015642	NM_032907	NM_006761
NM_014962	NM_019035	NM_182626	NM_005973	NM_001017962	NM_002577	NM_020228	NM_032146	NM_020379
NM_033285	NM_002971	NM_002010	NM_016169	NM_033143	NM_139321	NM_006718	NM_145034	NM_012247
NM_003257	NM_002114	NM_025202	NM_020859	NM_012238	NM_001009993	NM_031458	NM_019040	NM_003075
NM_199123	NM_172037	NM_152523	NM_014574	NM_001945	NM_021080	NM_018979	NM_014815	NM_020311
NM_005374	NM_006198	NM_002649	NM_182765	NM_145863	NM_018975	NM_014905	NM_172373	NM_004531
NM_005896	NM_014849	NM_001008404	NM_001005855	NM_004736	NM_052966	NM_004654	NM_177559	NM_133503
NM_015278	NM_015144	NM_171982	NM_001007228	NM_012176	NM_145110	NM_181042	NM_014943	NM_007368
NM_017693	NM_080685	NM_015884	NM_006653	NM_177453	NM_031157	NM_145053	NM_022353	NM_005733
NM_022753	NM_012081	NM_206967	NM_177559	NM_017943	NM_004035	NM_000088	NM_016287	NM_024843
NM_014660	NM_015251	NM_006751	NM_000848	NM_003453	NM_003012	NM_001684	NM_015368	NM_001008844
NM_033001	NM_145808	NM_014988	NM_002590	NM_006821	NM_153208	NM_001999	NM_005715	NM_014706
NM_001017421	NM_023923	NM_014035	NM_145869	NM_006746	NM_018068	NM_016023	NM_003342	NM_198830
NM_032290	NM_145341	NM_199176	NM_003748	NM_004075	NM_004264	NM_014689	NM_022755	NM_175872
NM_001284	NM_012286	NM_031246	NM_182697	NM_020921	NM_182757	NM_005100	NM_000158	NM_173217
NM_003291	NM_000841	NM_000297	NM_130434	NM_012167	NM_005345	NM_144617	NM_014035	NM_018638
NM_030751	NM_153261	NM_020525	NM_015340	NM_004423	NM_025208	NM_152409	NM_017787	NM_001356
NM_153826	NM_004370	NM_000692	NM_173515	NM_014829	NM_017637	NM_014872	NM_021230	NM_152523
NM_024843	NM_178517	NM_014096	NM_001001556	NM_017619	NM_001009555	NM_001233	NM_006751	NM_003184
NM_002467	NM_001017424	NM_032773	NM_080656	NM_022130	NM_005903	NM_025031	NM_000168	NM_021931
NM_018691	NM_001331	NM_004938	NM_015044	NM_139283	NM_001421	NM_018334	NM_032325	NM_006039
NM_004620	NM_201629	NM_033286	NM_020853	NM_015478	NM_003784	NM_005458	NM_014577	NM_153613
NM_003463	NM_014795	NM_181803	NM_002040	NM_003725	NM_206857	NM_033510	NM_173505	NM_002734
NM_138821	NM_015018	NM_024625	NM_024877	NM_152556	NM_019594	NM_003410	NM_003185	NM_000801
NM_004227	NM_005520	NM_005410	NM_005228	NM_020120	NM_022783	NM_005633	NM_001010856	NM_145110
NM_173362	NM_014774	NM_006449	NM_006153	NM_018137	NM_015079	NM_198489	NM_007190	NM_006805
NM_005780	NM_006867	NM_015429	NM_006485	NM_022133	NM_001005487	NM_002514	NM_025069	NM_003406
NM_015056	NM_017813	NM_031919	NM_004458	NM_032817	NM_032283	NM_018999	NM_001008844	NM_006892
NM_001001974	NM_005513	NM_002786	NM_139283	NM_004780	NM_018957	NM_000425	NM_024613	NM_181784
NM_013386	NM_153742	NM_006329	NM_021943	NM_016308	NM_001006603	NM_001001556	NM_177452	NM_001010856
NM_174858	NM_016626	NM_207577	NM_139207	NM_030979	NM_015955	NM_152515	NM_002719	NM_023037
NM_175061	NM_032832	NM_004249	NM_017454	NM_014563	NM_139122	NM_018566	NM_004329	NM_001017421
NM_000788	NM_001014451	NM_173174	NM_032595	NM_032364	NM_005311	NM_007114	NM_145341	NM_000660
NM_207012	NM_016018	NM_000900	NM_018682	NM_022373	NM_203304	NM_002161	NM_152999	NM_019096
NM_005841	NM_182687	NM_145016	NM_001001701	NM_001024455	NM_079834	NM_030594	NM_152445	NM_001357
NM_000274	NM_003071	NM_005375	NM_002940	NM_182682	NM_020353	NM_012291	NM_002623	NM_198552
NM_000051	NM_015124	NM_173544	NM_025208	NM_005153	NM_005346	NM_139201	NM_018087	NM_152306
NM_022082	NM_024430	NM_173362	NM_014994	NM_177989	NM_012266	NM_022753	NM_016048	NM_032264
NM_032107	NM_017640	NM_017413	NM_173510	NM_015251	NM_014915	NM_138794	NM_001003680	NM_000693
NM_183040	NM_020353	NM_001993	NM_144728	NM_000950	NM_000153	NM_020651	NM_006823	NM_020839
NM_020135	NM_201997	NM_000448	NM_213662	NM_015176	NM_198227	NM_013240	NM_001031725	NM_002311
NM_006329	NM_006153	NM_207318	NM_001380	NM_003764	NM_016932	NM_172208	NM_152408	NM_017905
NM_001003699	NM_004289	NM_178836	NM_138609	NM_020909	NM_153267	NM_014411	NM_198088	NM_005927
NM_001880	NM_014880	NM_001007553	NM_001010883	NM_015365	NM_030968	NM_025057	NM_182487	NM_173547
NM_001033523	NM_007362	NM_018249	NM_014676	NM_001029882	NM_152391	NM_002781	NM_006359	NM_005529
NM_207318	NM_153331	NM_005909	NM_021638	NM_001247	NM_004237	NM_033274	NM_005124	NM_014933
NM_020673	NM_172210	NM_153370	NM_005099	NM_005374	NM_006329	NM_003860	NM_000189	NM_007073
NM_020235	NM_013262	NM_004932	NM_138821	NM_182961	NM_153357	NM_001017962	NM_014646	NM_014023
NM_005342	NM_147686	NM_201636	NM_001448	NM_020727	NM_024602	NM_033255	NM_001730	NM_012428
NM_003406	NM_015361	NM_013240	NM_017619	NM_019593	NM_001932	NM_014149	NM_012482	NM_031263
NM_018279	NM_002938	NM_013355	NM_004869	NM_001980	NM_024015	NM_173576	NM_002599	NM_020323
NM_015476	NM_001009566	NM_007034	NM_003633	NM_032385	NM_181803	NM_014897	NM_019885	NM_022658
NM_016357	NM_031297	NM_005973	NM_001010892	NM_006016	NM_021643	NM_004521	NM_018137	NM_020918
NM_000671	NM_000544	NM_003711	NM_015272	NM_018638	NM_006067	NM_018981	NM_014399	NM_003971
NM_002719	NM_001010856	NM_018890	NM_153256	NM_032088	NM_018199	NM_017751	NM_152278	NM_030949
NM_021216	NM_000158	NM_032217	NM_016334	NM_014633	NM_203351	NM_022840	NM_003071	NM_001011516
NM_022484	NM_032773	NM_007223	NM_001031685	NM_017787	NM_201997	NM_020760	NM_016004	NM_006464
NM_001068	NM_003918	NM_004235	NM_032357	NM_206909	NM_015892	NM_004342	NM_000947	NM_018947
NM_173607	NM_024810	NM_001005521	NM_019600	NM_014711	NM_000337	NM_016575	NM_138958	NM_003246
NM_205836	NM_016048	NM_004664	NM_013282	NM_004906	NM_178518	NM_005401	NM_005444	NM_032364
NM_005638	NM_004733	NM_005983	NM_004973	NM_018193	NM_001017421	NM_000297	NM_198467	NM_003956
NM_015382	NM_001005409	NM_152998	NM_152282	NM_033426	NM_006242	NM_004225	NM_003873	NM_018043
NM_024633	NM_000561	NM_198892	NM_003071	NM_007081	NM_004098	NM_015308	NM_213589	NM_003330
NM_153353	NM_001431	NM_020746	NM_015071	NM_002786	NM_032569	NM_001001668	NM_153261	NM_207309
NM_005238	NM_015476	NM_001001688	NM_001980	NM_014903	NM_018149	NM_002072	NM_022366	NM_032800
NM_145012	NM_197941	NM_002430	NM_006737	NM_138287	NM_005638	NM_001009182	NM_144584	NM_138619
NM_017751	NM_004938	NM_018244	NM_198066	NM_024692	NM_006108	NM_080927	NM_001031685	NM_001030050
NM_018263	NM_001951	NM_002784	NM_153341	NM_181869	NM_000801	NM_002892	NM_025208	NM_005228
NM_015252	NM_033512	NM_058216	NM_001004297	NM_025211	NM_012219	NM_001004332	NM_080645	NM_014734
NM_005067	NM_194314	NM_001032288	NM_003082	NM_017705	NM_144726	NM_004105	NM_018130	NM_015117
NM_016395	NM_152238	NM_007054	NM_001034061	NM_145716	NM_005530	NM_033331	NM_021252	NM_133477
NM_001017368	NM_015404	NM_212551	NM_183376	NM_017693	NM_005627	NM_002164	NM_001067	NM_017747
NM_199053	NM_001892	NM_017669	NM_203406	NM_032264	NM_004040	NM_000825	NM_002588	NM_020210
NM_001257	NM_018087	NM_020809	NM_001938	NM_018651	NM_012081	NM_152730	NM_033128	NM_020353
NM_015832	NM_006916	NM_002785	NM_030939	NM_001452	NM_015689	NM_031292	NM_004650	NM_012219
NM_173562	NM_005841	NM_025239	NM_170665	NM_178154	NM_006055	NM_005231	NM_173797	NM_030939
NM_005843	NM_207577	NM_018207	NM_003309	NM_019843	NM_080645	NM_020762	NM_024077	NM_014901
NM_014616	NM_181442	NM_004573	NM_002938	NM_182476	NM_153341	NM_004385	NM_007353	NM_015261
NM_018847	NM_170773	NM_012310	NM_018257	NM_015476	NM_018948	NM_000366	NM_003304	NM_020738
NM_017680	NM_030940	NM_019024	NM_004339	NM_018316	NM_001357	NM_138333	NM_022752	NM_015963
NM_004521	NM_017964	NM_033133	NM_020182	NM_024754	NM_020806	NM_001002909	NM_014936	NM_177989
NM_022658	NM_015011	NM_025074	NM_032770	NM_001178	NM_013390	NM_001312	NM_001023571	NM_030800
NM_020149	NM_213589	NM_014900	NM_001002811	NM_172373	NM_001033028	NM_005843	NM_024430	NM_001429
NM_012424	NM_198567	NM_000387	NM_177947	NM_020135	NM_020311	NM_012288	NM_003012	NM_020244
NM_182977	NM_003749	NM_001017962	NM_000158	NM_031246	NM_001018115	NM_020443	NM_015329	NM_001101
NM_006165	NM_004035	NM_002072	NM_017693	NM_198467	NM_005826	NM_017440	NM_001001787	NM_198716
NM_018328	NM_000702	NM_053001	NM_005230	NM_016586	NM_019613	NM_002583	NM_002892	NM_024814
NM_006465	NM_006760	NM_032578	NM_033389	NM_024625	NM_182972	NM_001001872	NM_006732	NM_020801
NM_001017999	NM_014837	NM_173179	NM_002569	NM_139135	NM_053024	NM_145260	NM_022086	NM_012288
NM_017732	NM_006415	NM_014483	NM_030918	NM_138704	NM_033056	NM_006746	NM_145753	NM_030639
NM_018050	NM_002048	NM_000718	NM_014666	NM_213589	NM_024590	NM_080663	NM_003265	NM_014764
NM_173690	NM_000693	NM_207408	NM_080822	NM_014923	NM_005088	NM_030817	NM_198321	NM_012434
NM_016308	NM_004125	NM_052854	NM_014774	NM_014268	NM_032875	NM_022783	NM_174930	NM_173562
NM_001017424	NM_014503	NM_018676	NM_004728	NM_018999	NM_015711	NM_018140	NM_016138	NM_002449
NM_004595	NM_001566	NM_000901	NM_080797	NM_032532	NM_006165	NM_005711	NM_006526	NM_001769
NM_014494	NM_152431	NM_033642	NM_003394	NM_012247	NM_004901	NM_007235	NM_014574	NM_018486
NM_032154	NM_017801	NM_003983	NM_002709	NM_152511	NM_004780	NM_153214	NM_014898	NM_005342
NM_022733	NM_017454	NM_005374	NM_030979	NM_012081	NM_007260	NM_002658	NM_004035	NM_005670
NM_016277	NM_015264	NM_002613	NM_025138	NM_006815	NM_001358	NM_017774	NM_148172	NM_006371
NM_032861	NM_145753	NM_015691	NM_022130	NM_152902	NM_004441	NM_021135	NM_001031712	NM_004736
NM_182943	NM_021943	NM_020135	NM_152267	NM_001951	NM_002210	NM_007347	NM_004578	NM_138395
NM_022763	NM_153375	NM_017771	NM_173690	NM_017896	NM_138928	NM_001146	NM_004627	NM_003505
NM_001011538	NM_017741	NM_004433	NM_025069	NM_003860	NM_152834	NM_145753	NM_032342	NM_014447
NM_014055	NM_152282	NM_133459	NM_016617	NM_145297	NM_018367	NM_032018	NM_178826	NM_032907
NM_153260	NM_014719	NM_016441	NM_001024630	NM_001001715	NM_016486	NM_182692	NM_002875	NM_021629
NM_001024847	NM_016216	NM_153208	NM_016604	NM_017640	NM_015203	NM_058169	NM_020807	NM_022748
NM_053024	NM_014272	NM_015832	NM_000234	NM_005638	NM_182977	NM_153240	NM_152236	NM_018108
NM_017635	NM_000692	NM_032844	NM_003758	NM_005444	NM_003626	NM_005188	NM_001013649	NM_148919
NM_198080	NM_006821	NM_005197	NM_032900	NM_017515	NM_004324	NM_001013670	NM_006252	NM_005100
NM_024631	NM_003791	NM_020120	NM_004620	NM_032578	NM_017413	NM_033389	NM_001010883	NM_014556
NM_207113	NM_052858	NM_018289	NM_198830	NM_014992	NM_002335	NM_080645	NM_005819	NM_001949
NM_018299	NM_152523	NM_004226	NM_022106	NM_025158	NM_015995	NM_006547	NM_005859	NM_014671
NM_006994	NM_033300	NM_014572	NM_002467	NM_181785	NM_014487	NM_018138	NM_014153	NM_001964
NM_198459	NM_003023	NM_000088	NM_015949	NM_152278	NM_183075	NM_176800	NM_015278	NM_194293
NM_006969	NM_004655	NM_153321	NM_145110	NM_198402	NM_001025080	NM_001786	NM_001033059	NM_025164
NM_005999	NM_024709	NM_003956	NM_002072	NM_014795	NM_022817	NM_017853	NM_004779	NM_199334
NM_001008938	NM_004285	NM_024430	NM_004177	NM_016287	NM_002734	NM_001010856	NM_138821	NM_152793
NM_138316	NM_001001701	NM_001004343	NM_005067	NM_033425	NM_015023	NM_145233	NM_030919	NM_001030012
NM_020951	NM_002254	NM_032342	NM_001004125	NM_014660	NM_152345	NM_000885	NM_019600	NM_007223
NM_138395	NM_032270	NM_001617	NM_023076	NM_002006	NM_002714	NM_001549	NM_033319	NM_002160
NM_007342	NM_001003693	NM_080645	NM_153221	NM_024920	NM_014287	NM_001017421	NM_001007228	NM_001002860
NM_005493	NM_001007535	NM_172210	NM_022899	NM_014034	NM_001822	NM_007043	NM_001008393	NM_020422
NM_005529	NM_019885	NM_005398	NM_175767	NM_005461	NM_015005	NM_001024688	NM_004730	NM_001008529
NM_006259	NM_015020	NM_020853	NM_017745	NM_001004422	NM_004339	NM_153186	NM_152221	NM_001008225
NM_004290	NM_004368	NM_182922	NM_139201	NM_001275	NM_005828	NM_017926	NM_016316	NM_138386
NM_001001668	NM_181876	NM_006721	NM_138782	NM_032810	NM_152829	NM_001993	NM_020066	NM_005627
NM_001025595	NM_012124	NM_014391	NM_181701	NM_014837	NM_032382	NM_006165	NM_012479	NM_005839
NM_001224	NM_006994	NM_018841	NM_014153	NM_032373	NM_006750	NM_017640	NM_017411	NM_001257
NM_019613	NM_144728	NM_015641	NM_014898	NM_145012	NM_014633	NM_007349	NM_020854	NM_003247
NM_032012	NM_153240	NM_003390	NM_014936	NM_213604	NM_003406	NM_012250	NM_017664	NM_012393
NM_002061	NM_172373	NM_015375	NM_020195	NM_001033521	NM_003200	NM_001032731	NM_032088	NM_018476
NM_003022	NM_018099	NM_015065	NM_203382	NM_198097	NM_006307	NM_002275	NM_018847	NM_003819
NM_014550	NM_002508	NM_015079	NM_018309	NM_004824	NM_145012	NM_004787	NM_020948	NM_017910
NM_005109	NM_006653	NM_001010875	NM_001789	NM_001023571	NM_032342	NM_152581	NM_080685	NM_030629
NM_001723	NM_016486	NM_021102	NM_014862	NM_003971	NM_003344	NM_004423	NM_152305	NM_012197
NM_020791	NM_002053	NM_019846	NM_001003794	NM_001005409	NM_014483	NM_012388	NM_004815	NM_001365
NM_001769	NM_012167	NM_018076	NM_015056	NM_080681	NM_012288	NM_024048	NM_021931	NM_006405
NM_014056	NM_006815	NM_006821	NM_080685	NM_181706	NM_182943	NM_018343	NM_203464	NM_004040
NM_014899	NM_022733	NM_199511	NM_024604	NM_012279	NM_032433	NM_000093	NM_020149	NM_003496
NM_004339	NM_032317	NM_152621	NM_015144	NM_173510	NM_001659	NM_001875	NM_030939	NM_015541
NM_015094	NM_014957	NM_018027	NM_152608	NM_006820	NM_003246	NM_006472	NM_016617	NM_003194
NM_001166	NM_012176	NM_003370	NM_003571	NM_018439	NM_007220	NM_183245	NM_007006	NM_019010
NM_005443	NM_022783	NM_018443	NM_032103	NM_005491	NM_024295	NM_005902	NM_004780	NM_005780
NM_014243	NM_002786	NM_002467	NM_018108	NM_198887	NM_023110	NM_153000	NM_033115	NM_144594
NM_133377	NM_177453	NM_080629	NM_001032409	NM_014011	NM_033493	NM_207376	NM_004075	NM_014758
NM_020792	NM_152265	NM_005681	NM_024945	NM_018846	NM_018103	NM_001001715	NM_021627	NM_001008938
NM_000393	NM_018275	NM_001017421	NM_194331	NM_012403	NM_006209	NM_004237	NM_003983	NM_005345
NM_002048	NM_021820	NM_021111	NM_022373	NM_177559	NM_006133	NM_030806	NM_024095	NM_001017424
NM_006182	NM_173830	NM_000602	NM_001031693	NM_005346	NM_000917	NM_139135	NM_153256	NM_005863
NM_014556	NM_004423	NM_001030050	NM_012382	NM_001356	NM_031215	NM_005602	NM_005932	NM_022131
NM_001006610	NM_001268	NM_032049	NM_020244	NM_020803	NM_007187	NM_033394	NM_014633	NM_020917
NM_001005526	NM_003060	NM_014599	NM_007366	NM_014381	NM_024569	NM_004459	NM_018108	NM_004417
NM_012434	NM_017619	NM_130855	NM_001759	NM_015151	NM_015558	NM_014810	NM_032832	NM_032846
NM_006820	NM_001033521	NM_014992	NM_183006	NM_000692	NM_004417	NM_173646	NM_030796	NM_006791
NM_021991	NM_018200	NM_024322	NM_139317	NM_170665	NM_020444	NM_198080	NM_022913	NM_183382
NM_005401	NM_018352	NM_020792	NM_002078	NM_003877	NM_024779	NM_173636	NM_015130	NM_006389
NM_018200	NM_153018	NM_000561	NM_139321	NM_145114	NM_022748	NM_152270	NM_014056	NM_013451
NM_014043	NM_017693	NM_054034	NM_012479	NM_005772	NM_014423	NM_018991	NM_021979	NM_001765
NM_015450	NM_005044	NM_005100	NM_001031725	NM_014849	NM_003075	NM_003981	NM_014914	NM_014292
NM_006624	NM_024048	NM_022466	NM_001029859	NM_003873	NM_005109	NM_006329	NM_014711	NM_005333
NM_015384	NM_017719	NM_005782	NM_016121	NM_031157	NM_013262	NM_031407	NM_145863	NM_005328
NM_001101	NM_153223	NM_018004	NM_003791	NM_006511	NM_003655	NM_001017368	NM_007235	NM_000599
NM_003887	NM_016115	NM_004287	NM_014317	NM_002264	NM_175895	NM_014241	NM_001029859	NM_015056
NM_001017998	NM_032842	NM_015378	NM_014223	NM_002940	NM_006196	NM_194301	NM_015257	NM_006007
NM_001012418	NM_000230	NM_007202	NM_007109	NM_152787	NM_001995	NM_014766	NM_016134	NM_002928
NM_173576	NM_182697	NM_000898	NM_003873	NM_198700	NM_014447	NM_017693	NM_013263	NM_003060
NM_004206	NM_006055	NM_000046	NM_198182	NM_021783	NM_147133	NM_152511	NM_003400	NM_001020820
NM_015199	NM_198892	NM_018317	NM_002835	NM_007187	NM_000235	NM_024037	NM_015957	NM_002045
NM_032116	NM_001006636	NM_033066	NM_031263	NM_005499	NM_000291	NM_019043	NM_206854	NM_003453
NM_030881	NM_170744	NM_014779	NM_025246	NM_002590	NM_006806	NM_182507	NM_133459	NM_006196
NM_000983	NM_014898	NM_194317	NM_014459	NM_002915	NM_005398	NM_053279	NM_003262	NM_019045
NM_020926	NM_138782	NM_032195	NM_002764	NM_001014451	NM_012157	NM_001032288	NM_152437	NM_001614
NM_000917	NM_014674	NM_001030012	NM_001008896	NM_018159	NM_130395	NM_001822	NM_152289	NM_024911
NM_005482	NM_031263	NM_016724	NM_014810	NM_004433	NM_145911	NM_032086	NM_018686	NM_000551
NM_007114	NM_006364	NM_015507	NM_001007069	NM_032361	NM_001101	NM_033020	NM_002752	NM_003165
NM_001025580	NM_032088	NM_000090	NM_032844	NM_002223	NM_021814	NM_181869	NM_017454	NM_002444
NM_023037	NM_020195	NM_001006608	NM_024091	NM_005513	NM_012106	NM_001025580	NM_005006	NM_033285
NM_013372	NM_001004286	NM_015476	NM_001010853	NM_001001483	NM_021168	NM_002345	NM_021105	NM_004914
NM_001008239	NM_001240	NM_000848	NM_033089	NM_014028	NM_030636	NM_032116	NM_199053	NM_178502
NM_001005386	NM_152758	NM_015716	NM_181656	NM_005776	NM_024652	NM_052966	NM_175061	NM_001408
NM_024529	NM_080867	NM_005153	NM_015928	NM_003202	NM_003477	NM_001951	NM_005393	NM_014947
NM_024884	NM_152437	NM_153186	NM_015161	NM_022817	NM_153358	NM_001620	NM_005681	NM_004772
NM_138926	NM_014815	NM_024612	NM_018686	NM_001992	NM_020452	NM_005732	NM_014903	NM_004348
NM_014791	NM_031216	NM_153226	NM_001004286	NM_018290	NM_033407	NM_014138	NM_015602	NM_032199
NM_003664	NM_001284	NM_022824	NM_016620	NM_030918	NM_012091	NM_006282	NM_014764	NM_021217
NM_014444	NM_170665	NM_001033886	NM_021803	NM_006994	NM_005524	NM_021643	NM_022776	NM_015143
NM_144728	NM_003873	NM_022068	NM_013390	NM_014914	NM_002430	NM_003763	NM_018256	NM_001681
NM_057749	NM_001798	NM_002813	NM_018957	NM_002945	NM_001964	NM_018704	NM_001011553	NM_001733
NM_014764	NM_004901	NM_004863	NM_018037	NM_001001664	NM_003330	NM_020754	NM_031283	NM_004431
NM_001033028	NM_052887	NM_001114	NM_033300	NM_080651	NM_138428	NM_020699	NM_015393	NM_145273
NM_033407	NM_004973	NM_006403	NM_080836	NM_003745	NM_016441	NM_020690	NM_018190	NM_145298
NM_018275	NM_020149	NM_153018	NM_018200	NM_012207	NM_015213	NM_002613	NM_002056	NM_020967
NM_002396	NM_015381	NM_001001557	NM_005410	NM_020443	NM_014409	NM_207012	NM_020706	NM_012325
NM_001009555	NM_004019	NM_017424	NM_014563	NM_015061	NM_004749	NM_144664	NM_032506	NM_198141
NM_031442	NM_153341	NM_001031706	NM_014154	NM_024810	NM_001024733	NM_004447	NM_005602	NM_001684
NM_002345	NM_014904	NM_206854	NM_030789	NM_032217	NM_002868	NM_006901	NM_004736	NM_006106
NM_001304	NM_022896	NM_201442	NM_032410	NM_001007069	NM_183359	NM_014774	NM_003309	NM_014268
NM_003870	NM_014914	NM_015469	NM_018666	NM_016396	NM_031989	NM_032264	NM_006299	NM_199181
NM_002868	NM_032433	NM_018979	NM_019885	NM_001009566	NM_000600	NM_022074	NM_007259	NM_004419
NM_033406	NM_022566	NM_152399	NM_018130	NM_015329	NM_032800	NM_022836	NM_017640	NM_002868
NM_020338	NM_018686	NM_033331	NM_144779	NM_172346	NM_024843	NM_003060	NM_022778	NM_005012
NM_003298	NM_006359	NM_012403	NM_005513	NM_003633	NM_016472	NM_006721	NM_003202	NM_032886
NM_006464	NM_016623	NM_003391	NM_182626	NM_001009993	NM_014784	NM_015001	NM_152279	NM_006621
NM_144643	NM_004109	NM_014709	NM_152595	NM_001138	NM_033198	NM_003885	NM_018841	NM_016651
NM_020453	NM_138958	NM_020353	NM_016608	NM_005493	NM_005724	NM_018682	NM_033512	NM_015340
NM_018704	NM_001030007	NM_025213	NM_013995	NM_145257	NM_001008938	NM_004585	NM_207036	NM_014689
NM_004342	NM_006036	NM_015892	NM_000947	NM_015154	NM_005730	NM_016516	NM_018290	NM_024649
NM_015878	NM_032264	NM_001008712	NM_032918	NM_002875	NM_006624	NM_002276	NM_198402	NM_003250
NM_002161	NM_181869	NM_001067	NM_178154	NM_181656	NM_017747	NM_002764	NM_003831	NM_020375
NM_052966	NM_212551	NM_005338	NM_024574	NM_003304	NM_001013676	NM_152716	NM_144728	NM_001855
NM_021227	NM_170664	NM_016575	NM_032810	NM_018287	NM_001848	NM_020353	NM_145284	NM_005871
NM_003713	NM_007235	NM_153240	NM_207036	NM_024638	NM_001105	NM_000466	NM_000056	NM_018426
NM_022748	NM_015465	NM_016334	NM_006299	NM_144995	NM_032284	NM_025097	NM_007362	NM_032582
NM_171846	NM_021979	NM_020127	NM_004331	NM_170744	NM_002823	NM_021035	NM_138300	NM_001798
NM_007207	NM_017860	NM_001237	NM_002161	NM_015009	NM_006167	NM_152388	NM_001031693	NM_033551
NM_000235	NM_015161	NM_003588	NM_152787	NM_001642	NM_001008225	NM_022802	NM_007347	NM_018706
NM_003246	NM_014149	NM_015315	NM_032773	NM_031283	NM_002444	NM_002936	NM_030648	NM_006835
NM_006717	NM_032558	NM_005499	NM_002945	NM_016048	NM_005038	NM_005780	NM_005542	NM_016277
NM_002501	NM_001033886	NM_005899	NM_006646	NM_016617	NM_002845	NM_021737	NM_031157	NM_005646
NM_001714	NM_014098	NM_057159	NM_002359	NM_002048	NM_018571	NM_023034	NM_031372	NM_015213
NM_001681	NM_173654	NM_014174	NM_017784	NM_013262	NM_012102	NM_014600	NM_054012	NM_002061
NM_003250	NM_030919	NM_001753	NM_015864	NM_012408	NM_006763	NM_015865	NM_012255	NM_022062
NM_001655	NM_018128	NM_020748	NM_012204	NM_020066	NM_001417	NM_012124	NM_016604	NM_004598
NM_198567	NM_004736	NM_005231	NM_015176	NM_207323	NM_002161	NM_001008938	NM_174908	NM_032040
NM_004598	NM_152834	NM_145341	NM_000051	NM_182487	NM_002160	NM_005328	NM_001278	NM_007039
NM_015065	NM_001012987	NM_007316	NM_012279	NM_138821	NM_004064	NM_024642	NM_006828	NM_052854
NM_018718	NM_006379	NM_052884	NM_152756	NM_012319	NM_018256	NM_014884	NM_004290	NM_001848
NM_183006	NM_032043	NM_014633	NM_001017406	NM_020353	NM_172346	NM_004234	NM_015044	NM_021098
NM_032320	NM_181717	NM_001616	NM_052966	NM_003309	NM_198467	NM_001655	NM_001014451	NM_014904
NM_133376	NM_006883	NM_014921	NM_002714	NM_030939	NM_170686	NM_005128	NM_0164891	NM_002648
NM_001008408	NM_014943	NM_004334	NM_017515	NM_014871	NM_003407	NM_001031699	NM_152282	NM_024295
NM_019892	NM_015430	NM_003713	NM_024642	NM_014331	NM_007111	NM_001005354	NM_213604	NM_001791
NM_014411	NM_003309	NM_020814	NM_007198	NM_007265	NM_001731	NM_018042	NM_007198	NM_004647
NM_003763	NM_005999	NM_002959	NM_014098	NM_017741	NM_024649	NM_152603	NM_001033886	NM_182682
NM_012333	NM_012296	NM_000679	NM_024920	NM_014991	NM_025263	NM_001018040	NM_006595	NM_004926
NM_007106	NM_002752	NM_000522	NM_080745	NM_017637	NM_023931	NM_001013739	NM_020141	NM_170750
NM_003816	NM_015009	NM_133265	NM_003270	NM_145014	NM_003846	NM_003118	NM_014901	NM_006472
NM_181558	NM_018991	NM_004772	NM_182682	NM_018108	NM_020127	NM_014333	NM_203403	NM_018407
NM_001029839	NM_001224	NM_005602	NM_019843	NM_032199	NM_178502	NM_004772	NM_052913	NM_000332
NM_015143	NM_016072	NM_000459	NM_019897	NM_001031693	NM_002254	NM_005872	NM_018682	NM_018979
NM_016548	NM_033020	NM_014872	NM_144675	NM_080927	NM_004494	NM_003127	NM_001284	NM_053024
NM_005730	NM_012247	NM_014890	NM_018356	NM_018130	NM_006936	NM_002661	NM_025158	NM_005398
NM_006405	NM_001007069	NM_018842	NM_006603	NM_002359	NM_005902	NM_033034	NM_001017406	NM_019042
NM_024334	NM_006756	NM_001274	NM_001023587	NM_213598	NM_021988	NM_014904	NM_138609	NM_183414
NM_015409	NM_007110	NM_001010983	NM_207323	NM_020960	NM_012413	NM_003784	NM_024007	NM_003257
NM_176816	NM_014901	NM_004577	NM_015308	NM_003918	NM_017730	NM_020918	NM_030952	NM_006624
NM_173638	NM_001034061	NM_014925	NM_012081	NM_006646	NM_017586	NM_139266	NM_001023587	NM_014325
NM_014751	NM_017994	NM_019900	NM_003276	NM_001204	NM_001871	NM_032639	NM_001004286	NM_015331
NM_022757	NM_033143	NM_001032360	NM_020738	NM_004630	NM_002982	NM_001343	NM_015154	NM_006377
NM_014949	NM_020853	NM_001004286	NM_172373	NM_019032	NM_014758	NM_006403	NM_020826	NM_007080
NM_003075	NM_017664	NM_007270	NM_016072	NM_153018	NM_004897	NM_000773	NM_198431	NM_004879
NM_012325	NM_022373	NM_018149	NM_005010	NM_015130	NM_173562	NM_022118	NM_003107	NM_015865
NM_207323	NM_015345	NM_016613	NM_177452	NM_013339	NM_014699	NM_053024	NM_018128	NM_014483
NM_007222	NM_003831	NM_005724	NM_133494	NM_152267	NM_005168	NM_018841	NM_013390	NM_198907
NM_025222	NM_001013649	NM_002161	NM_133473	NM_181725	NM_032102	NM_176870	NM_018999	NM_015065
NM_020762	NM_031957	NM_000671	NM_014943	NM_005542	NM_139035	NM_020448	NM_025138	NM_031476
NM_170605	NM_031246	NM_001999	NM_002403	NM_001031685	NM_001814	NM_005342	NM_032813	NM_012106
NM_017934	NM_020803	NM_001233	NM_021705	NM_201636	NM_000850	NM_003567	NM_138967	NM_003409
NM_007099	NM_012279	NM_005264	NM_017958	NM_006805	NM_005098	NM_002501	NM_003060	NM_130395
NM_001110	NM_007347	NM_001505	NM_017943	NM_000153	NM_198252	NM_014174	NM_152882	NM_199168
NM_000426	NM_001017371	NM_005700	NM_017860	NM_001025080	NM_006621	NM_005859	NM_018294	NM_000198
NM_016297	NM_144726	NM_014791	NM_006256	NM_001010867	NM_015135	NM_002264	NM_012161	NM_004796
NM_006773	NM_017922	NM_004385	NM_016230	NM_005903	NM_002705	NM_003330	NM_001033561	NM_024569
NM_012137	NM_004779	NM_006020	NM_006165	NM_012236	NM_033632	NM_000235	NM_153186	NM_015094
NM_002890	NM_145254	NM_001153	NM_153033	NM_023923	NM_032846	NM_006985	NM_000108	NM_144617
NM_005388	NM_002906	NM_031299	NM_144646	NM_002709	NM_006212	NM_003478	NM_032489	NM_000527
NM_153705	NM_002438	NM_005328	NM_001812	NM_004286	NM_058216	NM_001257	NM_016623	NM_003618
NM_003131	NM_001024649	NM_005933	NM_194278	NM_004869	NM_005370	NM_003956	NM_003222	NM_057164
NM_021999	NM_182682	NM_006502	NM_213598	NM_022896	NM_007355	NM_001431	NM_001015053	NM_000983
NM_002936	NM_198097	NM_012279	NM_001033523	NM_007034	NM_014849	NM_014965	NM_000104	NM_004454
NM_006283	NM_004627	NM_183376	NM_004643	NM_207036	NM_001003396	NM_015476	NM_000850	NM_002501
NM_001008490	NM_138395	NM_018691	NM_022902	NM_018847	NM_001423	NM_002874	NM_015151	NM_016151
NM_001417	NM_004433	NM_019032	NM_002214	NM_173670	NM_032357	NM_002354	NM_182691	NM_017549
NM_016004	NM_016263	NM_017514	NM_053276	NM_015042	NM_019600	NM_001025356	NM_153826	NM_003835
NM_005517	NM_018004	NM_005373	NM_024698	NM_003392	NM_012210	NM_017658	NM_030918	NM_004371
NM_006807	NM_032813	NM_007207	NM_003983	NM_004643	NM_000612	NM_005603	NM_033286	NM_005678
NM_014325	NM_004098	NM_153263	NM_003367	NM_030796	NM_019102	NM_002293	NM_003344	NM_015169
NM_002948	NM_005137	NM_152583	NM_018137	NM_203453	NM_0247442	NM_007111	NM_003798	NM_017745
NM_015213	NM_015832	NM_012288	NM_003478	NM_145254	NM_000527	NM_002114	NM_006055	NM_002658
NM_003358	NM_181349	NM_001431	NM_001875	NM_002033	NM_152690	NM_012271	NM_014674	NM_017990
NM_019030	NM_181656	NM_015009	NM_001284	NM_017719	NM_003374	NM_006421	NM_014837	NM_199053
NM_002546	NM_002518	NM_020122	NM_015642	NM_199436	NM_005475	NM_001010924	NM_015713	NM_004663
NM_001033568	NM_020872	NM_024007	NM_003688	NM_004226	NM_198480	NM_001452	NM_194278	NM_005339
NM_014547	NM_004987	NM_014478	NM_006828	NM_018182	NM_025222	NM_002319	NM_024574	NM_004339
NM_016195	NM_005715	NM_000231	NM_002267	NM_203403	NM_031429	NM_194278	NM_004804	NM_001105
NM_003966	NM_017614	NM_005927	NM_002264	NM_014415	NM_021224	NM_012287	NM_007192	NM_178230
NM_001418	NM_001010853	NM_002783	NM_020947	NM_019900	NM_006079	NM_015585	NM_014333	NM_001796
NM_012197	NM_001642	NM_001018102	NM_000321	NM_004946	NM_002501	NM_181504	NM_002767	NM_014517
NM_198129	NM_015689	NM_024633	NM_006434	NM_033034	NM_001681	NM_005652	NM_182697	NM_006745
NM_198881	NM_007366	NM_032361	NM_015206	NM_004516	NM_018128	NM_001024847	NM_004368	NM_004814
NM_198197	NM_017958	NM_177433	NM_005338	NM_001024646	NM_012325	NM_001005386	NM_020452	NM_002755
NM_002293	NM_020437	NM_014309	NM_006359	NM_001047	NM_201268	NM_005513	NM_017958	NM_006366
NM_006936	NM_003453	NM_001144	NM_133265	NM_004241	NM_152713	NM_005955	NM_001240	NM_000602
NM_017902	NM_014563	NM_002781	NM_006029	NM_001724	NM_004879	NM_001101	NM_014458	NM_017772
NM_005611	NM_015042	NM_023039	NM_016619	NM_015423	NM_004598	NM_018121	NM_001010875	NM_004206
NM_013277	NM_130434	NM_153044	NM_002350	NM_017994	NM_006464	NM_058183	NM_005772	NM_001620
NM_183414	NM_144997	NM_138285	NM_181349	NM_006421	NM_000599	NM_153742	NM_033089	NM_015084
NM_000232	NM_014458	NM_020195	NM_005932	NM_007235	NM_001618	NM_178548	NM_014487	NM_000917
NM_145247	NM_198066	NM_001980	NM_002581	NM_004187	NM_014325	NM_006701	NM_006791	NM_001300
NM_001300	NM_014923	NM_001101	NM_015246	NM_006359	NM_032737	NM_213589	NM_012403	NM_001003396
NM_153682	NM_001031693	NM_004423	NM_005700	NM_017905	NM_198474	NM_033114	NM_198066	NM_012470
NM_021627	NM_006185	NM_001380	NM_022817	NM_021140	NM_015527	NM_001032999	NM_015938	NM_001386
NM_001177	NM_012236	NM_018685	NM_198080	NM_014223	NM_006472	NM_197958	NM_015231	NM_005207
NM_015317	NM_183376	NM_001357	NM_001013649	NM_014676	NM_017724	NM_173652	NM_005627	NM_001017392
NM_183359	NM_014034	NM_001516	NM_014689	NM_198080	NM_001008844	NM_012286	NM_007114	NM_004395
NM_006885	NM_030952	NM_001614	NM_006738	NM_012257	NM_001010990	NM_014344	NM_001068	NM_005683
NM_194071	NM_014423	NM_030583	NM_003831	NM_152882	NM_016128	NM_152265	NM_006805	NM_002546
NM_006621	NM_001018040	NM_013451	NM_052863	NM_000801	NM_022473	NM_014153	NM_019022	NM_007361
NM_152270	NM_003304	NM_033274	NM_015251	NM_017664	NM_013451	NM_003291	NM_020342	NM_016441
NM_012102	NM_153826	NM_004731	NM_006805	NM_020141	NM_000561	NM_020149	NM_002613	NM_198252
NM_015331	NM_002267	NM_153377	NM_016522	NM_014447	NM_015246	NM_024704	NM_181785	NM_003909
NM_006195	NM_025138	NM_004157	NM_005646	NM_030802	NM_003130	NM_001023571	NM_024621	NM_145014
NM_014345	NM_194278	NM_016548	NM_015208	NM_173797	NM_005823	NM_001031712	NM_016447	NM_002948
NM_006307	NM_020854	NM_018991	NM_012428	NM_004595	NM_001010862	NM_153261	NM_020412	NM_004034
NM_003016	NM_015397	NM_001822	NM_133459	NM_003507	NM_020422	NM_014563	NM_031284	NM_014413
NM_006939	NM_006206	NM_017444	NM_005168	NM_013399	NM_001154	NM_015535	NM_152306	NM_024567
NM_003472	NM_173607	NM_003583	NM_007269	NM_001005269	NM_014056	NM_024604	NM_153358	NM_006282
NM_016289	NM_004780	NM_018190	NM_138341	NM_020870	NM_001023587	NM_175085	NM_000276	NM_030881
NM_003622	NM_002815	NM_007265	NM_001032730	NM_007371	NM_031431	NM_002759	NM_001452	NM_025202
NM_033551	NM_206909	NM_020375	NM_002725	NM_005955	NM_005596	NM_003035	NM_138704	NM_003929
NM_002902	NM_145014	NM_152909	NM_021242	NM_006206	NM_003769	NM_006002	NM_020870	NM_002874
NM_020337	NM_032206	NM_021235	NM_181785	NM_020149	NM_014071	NM_182835	NM_004830	NM_022074
NM_003846	NM_018170	NM_003480	NM_001724	NM_003060	NM_013444	NM_032737	NM_018975	NM_018948
NM_014294	NM_152522	NM_002271	NM_203304	NM_018318	NM_001017974	NM_000891	NM_148957	NM_005742
NM_001822	NM_000110	NM_0181170	NM_182487	NM_022755	NM_139168	NM_002959	NM_014877	NM_003487
NM_001543	NM_032364	NM_003921	NM_005782	NM_015124	NM_001013840	NM_002317	NM_013943	NM_018941
NM_012234	NM_015329	NM_001677	NM_031284	NM_194331	NM_015939	NM_058216	NM_005973	NM_015493
NM_004705	NM_152278	NM_031263	NM_005540	NM_002938	NM_005471	NM_015419	NM_016169	NM_016081
NM_139279	NM_006449	NM_001017368	NM_006386	NM_003071	NM_006662	NM_003714	NM_017804	NM_006307
NM_004096	NM_001017421	NM_031157	NM_012257	NM_138300	NM_002658	NM_130386	NM_001204	NM_004450
NM_022735	NM_002581	NM_021135	NM_145034	NM_177452	NM_003998	NM_001018000	NM_005493	NM_002575
NM_018715	NM_006595	NM_144975	NM_001730	NM_001431	NM_021646	NM_018421	NM_199123	NM_000201
NM_001889	NM_177989	NM_174930	NM_001033028	NM_033331	NM_080491	NM_018103	NM_138473	NM_002293
NM_015622	NM_014242	NM_006364	NM_001033059	NM_012304	NM_004422	NM_000274	NM_005346	NM_006936
NM_057164	NM_001008394	NM_198080	NM_175061	NM_199053	NM_001620	NM_002467	NM_145653	NM_001690
NM_005614	NM_018290	NM_177423	NM_001408	NM_182922	NM_001068	NM_005567	NM_001397	NM_006999
NM_020234	NM_022133	NM_007111	NM_002892	NM_022902	NM_006990	NM_016613	NM_002945	NM_002537
NM_021183	NM_007190	NM_003506	NM_032317	NM_000356	NM_013403	NM_032358	NM_020244	NM_152270
NM_030954	NM_017905	NM_022787	NM_153263	NM_021145	NM_199205	NM_001020820	NM_024295	NM_000961
NM_006079	NM_014223	NM_005896	NM_001515	NM_014793	NM_004341	NM_006646	NM_145686	NM_015288
NM_001031699	NM_001033028	NM_032780	NM_014242	NM_019042	NM_002542	NM_000276	NM_019895	NM_181838
NM_000291	NM_003344	NM_149379	NM_033001	NM_152238	NM_203379	NM_018170	NM_015443	NM_005471
NM_001873	NM_003748	NM_014646	NM_148919	NM_145284	NM_000449	NM_178191	NM_001008696	NM_003998
NM_000430	NM_002709	NM_004776	NM_173473	NM_005006	NM_004772	NM_005738	NM_017745	NM_004156
NM_020152	NM_015231	NM_020808	NM_032361	NM_024604	NM_015963	NM_012167	NM_017905	NM_006029
NM_001839	NM_004795	NM_001034	NM_033362	NM_033089	NM_001004754	NM_004446	NM_178588	NM_005231
NM_001560	NM_002835	NM_000366	NM_152511	NM_025217	NM_153186	NM_006195	NM_006542	NM_000876
NM_014292	NM_032569	NM_020854	NM_020162	NM_020342	NM_018412	NM_138720	NM_000716	NM_152528
NM_014847	NM_018059	NM_004237	NM_016048	NM_001017406	NM_144609	NM_002356	NM_020872	NM_001024847
NM_020164	NM_173354	NM_021154	NM_001010879	NM_018004	NM_003651	NM_199037	NM_153267	NM_001850
NM_002568	NM_005780	NM_001010982	NM_002971	NM_181787	NM_014847	NM_015529	NM_006405	NM_003589
NM_019080	NM_177535	NM_152344	NM_203453	NM_016620	NM_001694	NM_004914	NM_022118	NM_001660
NM_006164	NM_006329	NM_016004	NM_018238	NM_018149	NM_178450	NM_018194	NM_138782	NM_005902
NM_004450	NM_001429	NM_012250	NM_016239	NM_001010879	NM_183422	NM_022473	NM_002948	NM_014876
NM_021137	NM_003039	NM_005333	NM_198402	NM_145753	NM_006009	NM_177947	NM_006815	NM_016258
NM_014686	NM_133264	NM_181785	NM_007157	NM_014888	NM_022658	NM_198830	NM_024843	NM_000435
NM_152356	NM_001204	NM_024628	NM_002786	NM_153706	NM_032442	NM_133376	NM_018042	NM_173514
NM_012233	NM_002725	NM_012219	NM_016548	NM_006595	NM_174902	NM_032727	NM_033222	NM_018027
NM_007288	NM_001024668	NM_015101	NM_006346	NM_032021	NM_001065	NM_031479	NM_000801	NM_020310
NM_001450	NM_194449	NM_001762	NM_015254	NM_004893	NM_002800	NM_016400	NM_198830	NM_173810
NM_003142	NM_018130	NM_031905	NM_002056	NM_002056	NM_015331	NM_003406	NM_032578	NM_021228
NM_001008491	NM_020379	NM_001032280	NM_002392	NM_017877	NM_002654	NM_001981	NM_005826	NM_005724
NM_014742	NM_020162	NM_198431	NM_015260	NM_018490	NM_001658	NM_002742	NM_004330	NM_032875
NM_016080	NM_213662	NM_032861	NM_203403	NM_018352	NM_178862	NM_152330	NM_006806	NM_017758
NM_006353	NM_152306	NM_024793	NM_033223	NM_004206	NM_021645	NM_007283	NM_006106	NM_175085
NM_006660	NM_013339	NM_014268	NM_001024668	NM_005410	NM_033551	NM_004598	NM_003194	NM_178231
NM_030790	NM_005652	NM_031216	NM_004058	NM_175061	NM_021574	NM_025217	NM_173501	NM_005686
NM_014647	NM_172364	NM_182691	NM_002874	NM_014098	NM_004674	NM_025154	NM_014970	NM_006565
NM_004862	NM_031492	NM_016206	NM_030648	NM_006091	NM_152740	NM_003257	NM_014793	NM_021035
NM_014974	NM_014892	NM_003184	NM_018128	NM_138958	NM_001020820	NM_002687	NM_033425	NM_007034
NM_014631	NM_194331	NM_000093	NM_153215	NM_080822	NM_001010866	NM_005737	NM_007079	NM_003758
NM_005207	NM_014838	NM_152522	NM_001761	NM_031957	NM_024789	NM_005153	NM_020375	NM_020899
NM_005156	NM_024625	NM_170606	NM_014877	NM_003589	NM_001159	NM_001013398	NM_003670	NM_005238
NM_001015053	NM_198830	NM_152553	NM_007371	NM_206854	NM_031476	NM_003870	NM_005903	NM_001693
NM_014957	NM_001875	NM_014458	NM_014454	NM_173473	NM_033375	NM_003142	NM_001233	NM_017929
NM_015002	NM_003392	NM_006133	NM_177966	NM_033389	NM_021135	NM_012137	NM_172212	NM_181471
NM_017953	NM_022899	NM_175883	NM_182642	NM_001762	NM_173810	NM_198480	NM_005517	NM_003651
NM_033396	NM_001017406	NM_000961	NM_153374	NM_001015509	NM_017758	NM_000251	NM_015955	NM_018085
NM_003199	NM_005638	NM_145305	NM_002845	NM_152829	NM_003139	NM_000168	NM_144997	NM_024334
NM_001032287	NM_001356	NM_000110	NM_005841	NM_001257	NM_002781	NM_206930	NM_003784	NM_201268
NM_015701	NM_018841	NM_001025077	NM_012408	NM_006987	NM_005354	NM_014864	NM_001007260	NM_001007098
NM_001453	NM_152909	NM_173670	NM_015541	NM_001284	NM_007219	NM_000089	NM_022836	NM_001992
NM_015026	NM_002467	NM_152240	NM_170695	NM_001144	NM_021991	NM_012081	NM_033396	NM_007076
NM_001219	NM_025069	NM_133503	NM_018991	NM_018095	NM_057164	NM_004109	NM_012151	NM_079837
NM_032906	NM_014599	NM_025217	NM_004206	NM_015161	NM_003168	NM_002522	NM_002612	NM_020338
NM_017669	NM_001626	NM_021783	NM_001334	NM_203304	NM_006835	NM_000946	NM_015622	NM_024595
NM_004985	NM_033191	NM_002356	NM_152702	NM_014957	NM_001386	NM_019030	NM_003453	NM_007355
NM_003136	NM_018847	NM_002177	NM_004290	NM_032317	NM_015252	NM_178230	NM_025154	NM_018223
NM_001386	NM_015254	NM_003831	NM_016834	NM_022733	NM_004371	NM_198566	NM_001001701	NM_000291
NM_006052	NM_033133	NM_032709	NM_000153	NM_021090	NM_153719	NM_198097	NM_005443	NM_198080
NM_139177	NM_002813	NM_015011	NM_205843	NM_024102	NM_005605	NM_002873	NM_032352	NM_003638
NM_001032999	NM_199123	NM_001017430	NM_022836	NM_013249	NM_002345	NM_031442	NM_030793	NM_005880
NM_133374	NM_020925	NM_005166	NM_152684	NM_175768	NM_019009	NM_020159	NM_005461	NM_004308
NM_004180	NM_001993	NM_145686	NM_017801	NM_015432	NM_199354	NM_177422	NM_172193	NM_001004019
NM_020899	NM_015257	NM_000599	NM_152425	NM_014674	NM_018368	NM_001017998	NM_002813	NM_022818
NM_014071	NM_004249	NM_017741	NM_003589	NM_003594	NM_013283	NM_018004	NM_015009	NM_001655
NM_001693	NM_024517	NM_000824	NM_152305	NM_019006	NM_014876	NM_020245	NM_001635	NM_021999
NM_005749	NM_014633	NM_025154	NM_001010982	NM_021147	NM_001693	NM_033551	NM_032364	NM_031904
NM_001949	NM_183414	NM_020754	NM_004893	NM_003980	NM_004275	NM_004595	NM_016115	NM_012405
NM_001020820	NM_004226	NM_012317	NM_201997	NM_003528	NM_020323	NM_003628	NM_183009	NM_005613
NM_014846	NM_005279	NM_153613	NM_024095	NM_007223	NM_001008712	NM_018693	NM_198097	NM_032985
NM_001018059	NM_014903	NM_002764	NM_006718	NM_014872	NM_004705	NM_020992	NM_006653	NM_002514
NM_030791	NM_013240	NM_005124	NM_006801	NM_005780	NM_021999	NM_144566	NM_207318	NM_018992
NM_004787	NM_006165	NM_016830	NM_005907	NM_012428	NM_024785	NM_006936	NM_015094	NM_015002
NM_201268	NM_138821	NM_001005911	NM_003262	NM_005632	NM_001008736	NM_001049	NM_183075	NM_004650
NM_022087	NM_005772	NM_003559	NM_020962	NM_201997	NM_006711	NM_001369	NM_002714	NM_000090
NM_017758	NM_001017962	NM_001116	NM_001003941	NM_016441	NM_006825	NM_001807	NM_152699	NM_138347
NM_198990	NM_152882	NM_001684	NM_001356	NM_001009182	NM_018992	NM_013995	NM_000561	NM_152713
NM_004879	NM_005542	NM_006415	NM_020959	NM_032049	NM_001921	NM_178588	NM_004331	NM_033339
NM_030629	NM_014711	NM_145794	NM_198552	NM_020792	NM_178014	NM_014758	NM_152522	NM_015713
NM_015577	NM_012257	NM_030806	NM_175569	NM_004458	NM_002857	NM_018171	NM_006745	NM_006763
NM_020744	NM_139135	NM_001789	NM_031950	NM_020807	NM_023018	NM_012197	NM_000891	NM_017842
NM_145053	NM_004893	NM_005780	NM_018193	NM_007157	NM_017491	NM_015634	NM_014904	NM_000937
NM_003348	NM_020342	NM_004035	NM_001005911	NM_032287	NM_003016	NM_152550	NM_017910	NM_001154
NM_033549	NM_006209	NM_004946	NM_014706	NM_015203	NM_001001974	NM_022658	NM_018124	NM_002556
NM_024086	NM_145212	NM_004906	NM_015477	NM_020853	NM_006570	NM_005552	NM_006296	NM_015289
NM_018477	NM_003758	NM_016586	NM_019006	NM_177966	NM_030629	NM_001017999	NM_005841	NM_014647
NM_001025202	NM_015541	NM_014556	NM_181869	NM_014943	NM_006070	NM_006009	NM_023039	NM_178818
NM_003374	NM_006750	NM_018486	NM_014252	NM_004285	NM_014977	NM_012062	NM_000600	NM_005842
NM_004336	NM_145297	NM_175886	NM_022083	NM_021942	NM_006312	NM_012414	NM_015485	NM_001797
NM_016098	NM_002945	NM_173638	NM_173654	NM_021235	NM_178230	NM_002737	NM_000235	NM_015282
NM_032857	NM_006502	NM_021942	NM_023039	NM_198567	NM_020899	NM_018257	NM_005279	NM_152308
NM_006925	NM_173473	NM_032532	NM_003344	NM_022101	NM_000681	NM_007106	NM_022344	NM_003469
NM_018011	NM_133503	NM_144617	NM_012238	NM_130395	NM_006145	NM_198402	NM_006385	NM_006028
NM_001154	NM_002210	NM_018304	NM_015691	NM_005443	NM_001012511	NM_013390	NM_005339	NM_006079
NM_152330	NM_198321	NM_024563	NM_025217	NM_001005404	NM_001664	NM_152282	NM_170750	NM_001664
NM_015529	NM_019024	NM_015430	NM_014599	NM_019022	NM_153269	NM_007081	NM_021975	NM_003127
NM_017526	NM_005171	NM_014423	NM_004285	NM_032258	NM_201384	NM_018164	NM_203304	NM_001731
NM_145331	NM_052932	NM_058182	NM_006746	NM_020194	NM_016057	NM_024814	NM_032558	NM_021908
NM_014275	NM_016248	NM_003291	NM_001999	NM_052913	NM_016081	NM_030759	NM_002582	NM_001658
NM_032772	NM_021217	NM_001001872	NM_144973	NM_020854	NM_004156	NM_022495	NM_015928	NM_003922
NM_020199	NM_014287	NM_153373	NM_000610	NM_001031812	NM_005207	NM_005514	NM_080841	NM_002609
NM_004371	NM_006526	NM_152388	NM_177453	NM_001017368	NM_033501	NM_003846	NM_004237	NM_021137
NM_001002296	NM_015130	NM_005646	NM_018263	NM_078476	NM_030674	NM_012233	NM_004869	NM_014476
NM_004396	NM_152511	NM_018257	NM_003507	NM_018238	NM_004472	NM_018182	NM_018200	NM_015063
NM_020773	NM_139201	NM_138794	NM_002654	NM_006038	NM_020992	NM_031216	NM_080836	NM_020444
NM_004162	NM_020443	NM_006009	NM_002114	NM_006299	NM_017443	NM_006296	NM_017426	NM_017614
NM_007008	NM_000046	NM_001001290	NM_020706	NM_033512	NM_001029891	NM_171982	NM_024814	NM_003846
NM_002478	NM_005868	NM_144497	NM_031912	NM_152259	NM_004862	NM_001613	NM_004643	NM_006070
NM_152316	NM_002613	NM_020149	NM_032532	NM_002524	NM_015444	NM_005429	NM_003528	NM_014840
NM_025137	NM_020120	NM_021633	NM_007320	NM_006542	NM_207343	NM_003850	NM_016357	NM_031989
NM_205855	NM_019006	NM_178230	NM_152221	NM_007190	NM_003107	NM_133468	NM_002033	NM_014575
NM_198252	NM_014051	NM_001224	NM_025074	NM_001008239	NM_006148	NM_003819	NM_020162	NM_015359
NM_152772	NM_018983	NM_014962	NM_005903	NM_015225	NM_016625	NM_016076	NM_001116	NM_003769
NM_152740	NM_017896	NM_152238	NM_014892	NM_001012987	NM_003564	NM_024334	NM_018602	NM_005476
NM_023015	NM_138300	NM_033121	NM_017741	NM_005733	NM_018660	NM_052817	NM_005137	NM_006618
NM_016061	NM_182922	NM_032927	NM_003194	NM_054035	NM_006643	NM_014691	NM_020379	NM_000362
NM_006178	NM_014721	NM_014877	NM_153044	NM_005231	NM_004425	NM_022763	NM_153331	NM_018054
NM_001031623	NM_005536	NM_006298	NM_016340	NM_153331	NM_006855	NM_001901	NM_001017962	NM_014766
NM_025164	NM_003507	NM_033480	NM_001488	NM_032569	NM_007359	NM_001300	NM_002467	NM_080491
NM_016333	NM_147150	NM_152369	NM_021975	NM_182909	NM_003223	NM_030918	NM_002161	NM_018100
NM_018453	NM_014447	NM_053067	NM_173344	NM_001031712	NM_019895	NM_003559	NM_018238	NM_001839
NM_018222	NM_003688	NM_030759	NM_152375	NM_001769	NM_002070	NM_002568	NM_017747	NM_016128
NM_002156	NM_001029882	NM_001034061	NM_001033659	NM_014423	NM_022138	NM_148923	NM_020990	NM_017740
NM_001664	NM_203453	NM_012425	NM_021947	NM_015308	NM_002631	NM_000801	NM_018095	NM_030961
NM_003769	NM_001762	NM_015264	NM_198532	NM_006185	NM_152716	NM_005019	NM_001033028	NM_004998
NM_005657	NM_019102	NM_024654	NM_002048	NM_025202	NM_020362	NM_014783	NM_003330	NM_016134
NM_004703	NM_000051	NM_030674	NM_015257	NM_018686	NM_004445	NM_018079	NM_001018040	NM_001018040
NM_024116	NM_017745	NM_004285	NM_213604	NM_004733	NM_002087	NM_005504	NM_004379	NM_019895
NM_001921	NM_016522	NM_000393	NM_001224	NM_015058	NM_001003810	NM_003292	NM_032287	NM_003374
NM_007085	NM_015432	NM_000291	NM_004730	NM_002254	NM_006052	NM_001005333	NM_183382	NM_007111
NM_005778	NM_006714	NM_177441	NM_018348	NM_017811	NM_001008218	NM_002290	NM_025238	NM_002823
NM_004774	NM_152999	NM_018323	NM_152528	NM_001033028	NM_002881	NM_199072	NM_013339	NM_173480
NM_015702	NM_002874	NM_005401	NM_007187	NM_002518	NM_005439	NM_203463	NM_172209	NM_004840
NM_007027	NM_170695	NM_006310	NM_022913	NM_025154	NM_005707	NM_006148	NM_022106	NM_006675
NM_022730	NM_004093	NM_173540	NM_000276	NM_015323	NM_133178	NM_006322	NM_001017421	NM_001008743
NM_138565	NM_152678	NM_013412	NM_004975	NM_014764	NM_003217	NM_014676	NM_175636	NM_177444
NM_016038	NM_080645	NM_138333	NM_015995	NM_002061	NM_021035	NM_052947	NM_033114	NM_005875
NM_001743	NM_181785	NM_002629	NM_130835	NM_139278	NM_004286	NM_207036	NM_002577	NM_006009
NM_024574	NM_023039	NM_152511	NM_174930	NM_005841	NM_001521	NM_173490	NM_020755	NM_018184
NM_003981	NM_017747	NM_001009182	NM_152406	NM_133264	NM_001235	NM_138565	NM_198401	NM_152653
NM_014765	NM_032740	NM_033255	NM_014575	NM_001010856	NM_030881	NM_006283	NM_152388	NM_005354
NM_020830	NM_005667	NM_014154	NM_003022	NM_007361	NM_004955	NM_006070	NM_144726	NM_020888
NM_003605	NM_003713	NM_025209	NM_152320	NM_001009555	NM_012317	NM_017660	NM_014871	NM_017660
NM_144600	NM_182487	NM_152366	NM_003594	NM_001397	NM_030809	NM_022130	NM_018983	NM_000391
NM_134264	NM_174911	NM_001001701	NM_022133	NM_024015	NM_001614	NM_032800	NM_003074	NM_030809
NM_001159	NM_001677	NM_001920	NM_007006	NM_018983	NM_032047	NM_020808	NM_153373	NM_012210
NM_016255	NM_001008696	NM_014051	NM_001752	NM_014574	NM_005614	NM_032846	NM_213662	NM_004472
NM_004943	NM_007202	NM_001012414	NM_003107	NM_020651	NM_207306	NM_014735	NM_153645	NM_001423
NM_025141	NM_033396	NM_001017370	NM_201520	NM_152271	NM_152653	NM_002473	NM_001904	NM_000943
NM_018386	NM_018124	NM_002048	NM_000693	NM_015264	NM_033446	NM_025137	NM_015642	NM_003655
NM_003919	NM_014735	NM_013343	NM_183382	NM_080645	NM_025164	NM_032102	NM_013402	NM_002473
NM_018206	NM_005826	NM_080660	NM_016263	NM_015278	NM_015493	NM_005605	NM_014166	NM_001031706
NM_012180	NM_018486	NM_033115	NM_004736	NM_024574	NM_002629	NM_002047	NM_006029	NM_014287
NM_017694	NM_004995	NM_001001548	NM_021818	NM_020918	NM_016147	NM_018178	NM_016076	NM_006855
NM_018223	NM_020244	NM_003632	NM_004946	NM_005715	NM_001005333	NM_171846	NM_145804	NM_013444
NM_018442	NM_005933	NM_014331	NM_025057	NM_181349	NM_015409	NM_012199	NM_015265	NM_001455
NM_024071	NM_017771	NM_014735	NM_030777	NM_002859	NM_005417	NM_014458	NM_000190	NM_018689
NM_144629	NM_177974	NM_173825	NM_199283	NM_032325	NM_018835	NM_000436	NM_003758	NM_022662
NM_002137	NM_017943	NM_005450	NM_145017	NM_001017421	NM_002880	NM_003664	NM_012428	NM_004774
NM_002290	NM_033055	NM_032221	NM_003713	NM_018128	NM_004295	NM_173793	NM_005228	NM_002982
NM_016644	NM_018137	NM_020443	NM_005638	NM_016613	NM_004168	NM_052965	NM_021235	NM_001554
NM_005202	NM_005443	NM_004339	NM_014035	NM_001515	NM_004926	NM_014575	NM_001779	NM_032727
NM_138437	NM_182757	NM_014296	NM_020135	NM_019613	NM_003567	NM_001235	NM_012408	NM_001846
NM_144578	NM_152862	NM_003118	NM_020872	NM_173362	NM_001014842	NM_005057	NM_004776	NM_022109
NM_003715	NM_033425	NM_024759	NM_006218	NM_005904	NM_020216	NM_030961	NM_015026	NM_005560
NM_000937	NM_016604	NM_004098	NM_006951	NM_004779	NM_016525	NM_021652	NM_003819	NM_130435
NM_016451	NM_001707	NM_030940	NM_005443	NM_020244	NM_001009551	NM_006084	NM_005776	NM_004892
NM_014913	NM_144981	NM_017637	NM_016142	NM_014267	NM_016545	NM_001012456	NM_003406	NM_003174
NM_014106	NM_182648	NM_016486	NM_004187	NM_001004125	NM_006054	NM_182703	NM_000983	NM_001304
NM_021626	NM_015079	NM_194325	NM_006595	NM_003784	NM_014647	NM_002539	NM_018164	NM_152531
NM_015578	NM_015023	NM_023923	NM_015231	NM_005252	NM_006618	NM_006885	NM_003469	NM_004862
NM_015599	NM_032342	NM_019885	NM_005339	NM_016001	NM_052897	NM_001415	NM_004577	NM_004730
NM_004619	NM_016169	NM_015176	NM_012175	NM_002734	NM_004718	NM_002474	NM_001030007	NM_024306
NM_004652	NM_012304	NM_198097	NM_016308	NM_024007	NM_001008910	NM_003711	NM_018004	NM_002356
NM_013293	NM_020141	NM_022445	NM_015957	NM_019035	NM_144617	NM_018254	NM_006329	NM_002936
NM_004674	NM_006805	NM_020228	NM_017626	NM_000158	NM_080652	NM_024569	NM_022783	NM_014669
NM_003487	NM_004311	NM_203430	NM_031299	NM_000930	NM_018064	NM_172346	NM_016098	NM_030665
NM_015055	NM_012428	NM_022658	NM_021145	NM_213662	NM_016022	NM_031299	NM_020239	NM_021814
NM_002067	NM_001030050	NM_002938	NM_182961	NM_014689	NM_198902	NM_006773	NM_033389	NM_003626
NM_003799	NM_006403	NM_003749	NM_001530	NM_032145	NM_139177	NM_025238	NM_015213	NM_016142
NM_012212	NM_002734	NM_014550	NM_003330	NM_015368	NM_022737	NM_007372	NM_032145	NM_005334
NM_014876	NM_152267	NM_007157	NM_016357	NM_006714	NM_002067	NM_007342	NM_003275	NM_006813
NM_018261	NM_181725	NM_001450	NM_013943	NM_005724	NM_031203	NM_004290	NM_032856	NM_001418
NM_194359	NM_001006603	NM_153682	NM_015130	NM_033222	NM_023080	NM_014970	NM_032800	NM_007047
NM_003130	NM_001031812	NM_001018000	NM_130771	NM_018975	NM_003391	NM_018199	NM_007220	NM_021737
NM_003045	NM_007270	NM_015383	NM_030751	NM_032852	NM_006516	NM_003966	NM_014735	NM_006452
NM_000362	NM_002056	NM_001452	NM_004814	NM_004290	NM_001025356	NM_001284	NM_178862	NM_001430
NM_152828	NM_080836	NM_033034	NM_002582	NM_018279	NM_176812	NM_003487	NM_012395	NM_001666
NM_170679	NM_007034	NM_018335	NM_015169	NM_018061	NM_005022	NM_000983	NM_152511	NM_007350
NM_006835	NM_004379	NM_000788	NM_017934	NM_002271	NM_007353	NM_013373	NM_181803	NM_152354
NM_006585	NM_002271	NM_002874	NM_019613	NM_002086	NM_032020	NM_015144	NM_018139	NM_001025100
NM_020940	NM_014779	NM_004311	NM_182691	NM_005782	NM_005842	NM_002370	NM_014992	NM_022553
NM_002999	NM_152699	NM_018062	NM_003819	NM_005527	NM_003858	NM_000660	NM_005642	NM_003565
NM_002076	NM_001005404	NM_144728	NM_182909	NM_004109	NM_004892	NM_005207	NM_001029851	NM_018026
NM_005102	NM_020375	NM_174911	NM_006806	NM_000108	NM_003250	NM_017549	NM_015210	NM_007313
NM_173834	NM_001003396	NM_014178	NM_173653	NM_138437	NM_003155	NM_017998	NM_152267	NM_003128
NM_005506	NM_000108	NM_016134	NM_130395	NM_002161	NM_025026	NM_006815	NM_014447	NM_004661
NM_002806	NM_001291	NM_032385	NM_194449	NM_015999	NM_025230	NM_002372	NM_013374	NM_020152
NM_014177	NM_019613	NM_194278	NM_001981	NM_002906	NM_005875	NM_021915	NM_182977	NM_004738
NM_014999	NM_004630	NM_033394	NM_080927	NM_001023587	NM_001073	NM_030939	NM_003246	NM_003118
NM_024315	NM_173515	NM_003594	NM_006727	NM_005999	NM_001975	NM_206909	NM_006366	NM_007236
NM_001752	NM_004329	NM_007039	NM_001011553	NM_018356	NM_018054	NM_005560	NM_002845	NM_020127
NM_004052	NM_016206	NM_178229	NM_012176	NM_145686	NM_017660	NM_001002257	NM_003688	NM_017851
NM_175854	NM_080651	NM_001029882	NM_001006637	NM_006029	NM_007313	NM_199512	NM_145049	NM_001283
NM_199246	NM_012219	NM_001235	NM_014903	NM_032195	NM_015411	NM_003713	NM_005839	NM_001017974
NM_153367	NM_014153	NM_012176	NM_033554	NM_004330	NM_001797	NM_017548	NM_002874	NM_014272
NM_006888	NM_004331	NM_000264	NM_007029	NM_019885	NM_006035	NM_145863	NM_004285	NM_018206
NM_005224	NM_020135	NM_021931	NM_133451	NM_153826	NM_016270	NM_020738	NM_004098	NM_012155
NM_183079	NM_020452	NM_018682	NM_199123	NM_000719	NM_003144	NM_182595	NM_015534	NM_000393
NM_015435	NM_031284	NM_001025100	NM_018975	NM_007270	NM_005789	NM_080687	NM_014758	NM_002454
NM_002294	NM_014676	NM_000381	NM_016090	NM_080836	NM_007085	NM_018101	NM_002748	NM_080841
NM_017660	NM_001659	NM_012304	NM_004226	NM_004995	NM_139034	NM_002267	NM_006773	NM_183422
NM_003168	NM_207036	NM_183075	NM_152678	NM_005204	NM_005606	NM_003136	NM_021156	NM_014874
NM_013436	NM_013960	NM_182757	NM_025154	NM_005057	NM_002727	NM_020839	NM_003507	NM_001008490
NM_015155	NM_130385	NM_014847	NM_020731	NM_001334	NM_016546	NM_033224	NM_005780	NM_001001556
NM_018115	NM_016355	NM_030821	NM_014795	NM_201994	NM_004342	NM_005576	NM_005204	NM_001734
NM_020765	NM_005231	NM_001449	NM_007220	NM_006653	NM_014556	NM_002982	NM_018183	NM_015080
NM_001065	NM_014454	NM_001543	NM_006329	NM_198830	NM_203305	NM_004582	NM_020662	NM_002067
NM_018307	NM_203414	NM_016216	NM_004237	NM_203371	NM_002103	NM_003071	NM_033055	NM_014870
NM_001003810	NM_001769	NM_001299	NM_001008844	NM_005700	NM_020226	NM_012425	NM_024698	NM_032737
NM_006822	NM_001452	NM_199295	NM_004098	NM_001226	NM_025193	NM_018129	NM_024312	NM_006048
NM_139126	NM_015308	NM_001892	NM_032842	NM_014721	NM_014225	NM_007222	NM_001007553	NM_001449
NM_005707	NM_004206	NM_000943	NM_012089	NM_031216	NM_001029	NM_005171	NM_001005404	NM_004718
NM_152609	NM_199324	NM_004580	NM_031157	NM_004098	NM_033161	NM_012264	NM_194449	NM_004756
NM_013232	NM_001023571	NM_198088	NM_145284	NM_031372	NM_002633	NM_015018	NM_024649	NM_015634
NM_003217	NM_006532	NM_152699	NM_019009	NM_033020	NM_001908	NM_007069	NM_004901	NM_001010990
NM_032574	NM_006020	NM_005738	NM_020375	NM_000168	NM_032041	NM_003034	NM_052932	NM_005063
NM_017443	NM_014929	NM_025136	NM_032352	NM_001001701	NM_014933	NM_005578	NM_019032	NM_177559
NM_058172	NM_024007	NM_002658	NM_012395	NM_152528	NM_015352	NM_005156	NM_006241	NM_006601
NM_012316	NM_014764	NM_003099	NM_006379	NM_002835	NM_016823	NM_139321	NM_175876	NM_139322
NM_003011	NM_153613	NM_005529	NM_054012	NM_018319	NM_020946	NM_198576	NM_004420	NM_000318
NM_017891	NM_007265	NM_080797	NM_001023571	NM_003012	NM_002473	NM_130830	NM_001357	NM_005717
NM_024100	NM_006016	NM_024649	NM_002878	NM_000381	NM_004390	NM_153260	NM_003022	NM_002752
NM_004551	NM_001009993	NM_004472	NM_020870	NM_022344	NM_001283	NM_001029859	NM_022067	NM_172169
NM_031452	NM_001001290	NM_004227	NM_004329	NM_032581	NM_145648	NM_203296	NM_181701	NM_006931
NM_015636	NM_133372	NM_058195	NM_212551	NM_001034061	NM_006640	NM_001012511	NM_006371	NM_013283
NM_005773	NM_020807	NM_001848	NM_016623	NM_004329	NM_001987	NM_032182	NM_014267	NM_000930
NM_201222	NM_018108	NM_005902	NM_024295	NM_004627	NM_152616	NM_015042	NM_031246	NM_014786
NM_198044	NM_032154	NM_014333	NM_005128	NM_144693	NM_000088	NM_005116	NM_003010	NM_005177
NM_030580	NM_152705	NM_194449	NM_014914	NM_005826	NM_003945	NM_000070	NM_201442	NM_004050
NM_022779	NM_001101	NM_198066	NM_018407	NM_020375	NM_002010	NM_004526	NM_015995	NM_005184
NM_024109	NM_001010982	NM_020992	NM_001008239	NM_024306	NM_080725	NM_001004304	NM_181784	NM_018482
NM_022149	NM_001980	NM_133446	NM_152705	NM_173638	NM_001290	NM_020951	NM_181869	NM_016333
NM_006410	NM_005627	NM_016263	NM_022831	NM_000276	NM_003001	NM_001006610	NM_005828	NM_001649
NM_013319	NM_005955	NM_152406	NM_014051	NM_032558	NM_005194	NM_020319	NM_002703	NM_025140
NM_199244	NM_032195	NM_004538	NM_015329	NM_130835	NM_014713	NM_006904	NM_016248	NM_001031695
NM_133436	NM_002430	NM_006342	NM_001993	NM_024517	NM_018390	NM_033501	NM_017810	NM_024501
NM_004127	NM_198700	NM_003127	NM_002744	NM_152522	NM_021174	NM_145686	NM_031492	NM_001006610
NM_022765	NM_018095	NM_003250	NM_014804	NM_001030012	NM_006409	NM_004698	NM_021826	NM_002737
NM_014237	NM_021627	NM_015020	NM_145863	NM_177441	NM_001450	NM_032436	NM_012329	NM_015602
NM_013245	NM_024095	NM_177947	NM_022733	NM_014929	NM_030579	NM_024728	NM_004520	NM_016019
NM_005886	NM_005346	NM_000850	NM_014755	NM_020865	NM_020414	NM_194359	NM_002734	NM_003737
NM_001001438	NM_005338	NM_001010856	NM_005800	NM_032352	NM_030981	NM_015608	NM_001418	NM_006825
NM_018127	NM_001233	NM_005776	NM_001008529	NM_024095	NM_014786	NM_002222	NM_003909	NM_002076
NM_138412	NM_033339	NM_002859	NM_173797	NM_014487	NM_002609	NM_003369	NM_001006603	NM_001921
NM_024332	NM_001981	NM_015056	NM_017905	NM_004339	NM_175709	NM_080745	NM_145014	NM_004494
NM_000455	NM_005776	NM_133493	NM_001030007	NM_012243	NM_003169	NM_015261	NM_015275	NM_001005333
NM_003635	NM_020210	NM_152902	NM_004595	NM_006020	NM_022740	NM_058195	NM_006391	NM_001343
NM_005967	NM_007047	NM_005443	NM_021643	NM_014838	NM_001456	NM_018222	NM_001707	NM_014686
NM_016009	NM_016395	NM_139135	NM_138639	NM_015642	NM_000876	NM_003316	NM_032532	NM_139323
NM_144976	NM_032325	NM_004901	NM_032424	NM_052887	NM_133635	NM_003062	NM_152344	NM_012098
NM_194280	NM_080797	NM_003036	NM_172212	NM_133493	NM_023015	NM_014226	NM_004836	NM_207332
NM_006114	NM_001365	NM_058183	NM_018199	NM_022067	NM_031904	NM_018715	NM_001017424	NM_004281
NM_003321	NM_004330	NM_133376	NM_003784	NM_025238	NM_004450	NM_014396	NM_003297	NM_003403
NM_030783	NM_014317	NM_000681	NM_002577	NM_006491	NM_000404	NM_005730	NM_002539	NM_182557
NM_001517	NM_030918	NM_032623	NM_007347	NM_013343	NM_000320	NM_019852	NM_012288	NM_003001
NM_139178	NM_172193	NM_012247	NM_012403	NM_005932	NM_007285	NM_017953	NM_052965	NM_005022
NM_018215	NM_015278	NM_000168	NM_021809	NM_018259	NM_003596	NM_004431	NM_032361	NM_003898
NM_022485	NM_001753	NM_007281	NM_003453	NM_020412	NM_013399	NM_173797	NM_005724	NM_005606
NM_012320	NM_001031725	NM_018128	NM_000908	NM_001017371	NM_005184	NM_014889	NM_006963	NM_002893
NM_000375	NM_006791	NM_016270	NM_022838	NM_015265	NM_004661	NM_153018	NM_006135	NM_001618
NM_015242	NM_005067	NM_025158	NM_001018102	NM_032154	NM_000391	NM_017747	NM_001417	NM_013384
NM_001004126	NM_017730	NM_014287	NM_138437	NM_182757	NM_017955	NM_007198	NM_004866	NM_001031707
NM_001024	NM_001616	NM_001017922	NM_152542	NM_020872	NM_017617	NM_020338	NM_012475	NM_003567
NM_016491	NM_013263	NM_014822	NM_005715	NM_144981	NM_001920	NM_014865	NM_001358	NM_000385
NM_003776	NM_023076	NM_207376	NM_178230	NM_001030007	NM_006182	NM_207118	NM_001642	NM_003358
NM_015679	NM_145263	NM_015328	NM_018182	NM_014382	NM_058246	NM_170750	NM_182682	NM_013433
NM_032350	NM_003784	NM_013269	NM_022066	NM_006055	NM_001743	NM_001006622	NM_015382	NM_152493
NM_031488	NM_001030012	NM_000089	NM_005904	NM_016447	NM_016333	NM_020452	NM_006016	NM_024541
NM_015600	NM_001116	NM_015252	NM_001007535	NM_018103	NM_022087	NM_018370	NM_012434	NM_018475
NM_001262	NM_006527	NM_014242	NM_004779	NM_004730	NM_000089	NM_015251	NM_001415	NM_020992
NM_020441	NM_001011553	NM_152282	NM_005333	NM_033394	NM_023019	NM_014325	NM_005067	NM_005597
NM_025124	NM_015938	NM_001025595	NM_006421	NM_003151	NM_007326	NM_005839	NM_002015	NM_021135
NM_013247	NM_152391	NM_001004127	NM_013240	NM_003931	NM_001024959	NM_183247	NM_212551	NM_002145
NM_015609	NM_015999	NM_021643	NM_032283	NM_006750	NM_017654	NM_001530	NM_183422	NM_006818
NM_015853	NM_053001	NM_018159	NM_031492	NM_031935	NM_006317	NM_003861	NM_005109	NM_054034
NM_130459	NM_012288	NM_014322	NM_005461	NM_001677	NM_032960	NM_018847	NM_014570	NM_016620
NM_016030	NM_032287	NM_004302	NM_138704	NM_014892	NM_006292	NM_022757	NM_004979	NM_004559
NM_022102	NM_005398	NM_001011516	NM_001153	NM_153377	NM_003928	NM_001008491	NM_014721	NM_004275
NM_006337	NM_003725	NM_021943	NM_013371	NM_003930	NM_002539	NM_003250	NM_020353	NM_006312
NM_007121	NM_007223	NM_005020	NM_006067	NM_030809	NM_000937	NM_003480	NM_014599	NM_014056
NM_006458	NM_019096	NM_207012	NM_021252	NM_199324	NM_080629	NM_017542	NM_006565	NM_005614
NM_194460	NM_002021	NM_012106	NM_018294	NM_015261	NM_054014	NM_014974	NM_145243	NM_017443
NM_003866	NM_030627	NM_001880	NM_198097	NM_003713	NM_003029	NM_012212	NM_001889	NM_015840
NM_201286	NM_007080	NM_003473	NM_024814	NM_020801	NM_001402	NM_144628	NM_016258	NM_005637
NM_007171	NM_022817	NM_016277	NM_002061	NM_006387	NM_080792	NM_006888	NM_006475	NM_030810
NM_000259	NM_001257	NM_021705	NM_003670	NM_007049	NM_001654	NM_004156	NM_016355	NM_015939
NM_002824	NM_016507	NM_020663	NM_017719	NM_080687	NM_153214	NM_004371	NM_000671	NM_016270
NM_004373	NM_000801	NM_024334	NM_012482	NM_002827	NM_002593	NM_002546	NM_001013840	NM_003945
NM_000984	NM_207318	NM_014153	NM_033493	NM_004368	NM_004281	NM_032242	NM_014810	NM_007085
NM_030815	NM_024843	NM_014575	NM_025250	NM_001005911	NM_172169	NM_002061	NM_145212	NM_014760
NM_001061	NM_030967	NM_001017974	NM_005270	NM_001033059	NM_003348	NM_000430	NM_004297	NM_012233
NM_174855	NM_016134	NM_025057	NM_173810	NM_015892	NM_018386	NM_019080	NM_017614	NM_004924
NM_022895	NM_004339	NM_007007	NM_033286	NM_002577	NM_014902	NM_138959	NM_015465	NM_003168
NM_022126	NM_153365	NM_052913	NM_005346	NM_020452	NM_153271	NM_152369	NM_005868	NM_001008491
NM_031485	NM_003194	NM_144573	NM_021931	NM_152705	NM_003243	NM_001664	NM_031263	NM_003016
NM_006279	NM_003819	NM_016320	NM_004218	NM_005067	NM_006675	NM_005177	NM_005345	NM_015234
NM_006468	NM_003670	NM_005128	NM_153706	NM_138335	NM_005762	NM_002714	NM_017998	NM_007021
NM_004085	NM_033407	NM_006153	NM_001007553	NM_032900	NM_000100	NM_017832	NM_004595	NM_006369
NM_013234	NM_015080	NM_018490	NM_004330	NM_015713	NM_133376	NM_000351	NM_001224	NM_012317
NM_004594	NM_145016	NM_020186	NM_016355	NM_003819	NM_005984	NM_002868	NM_022817	NM_002764
NM_174905	NM_016617	NM_031458	NM_004938	NM_005627	NM_016433	NM_001006933	NM_018984	NM_018660
NM_016066	NM_015382	NM_181869	NM_014921	NM_033274	NM_005850	NM_002973	NM_003130	NM_002881
NM_001023560	NM_022366	NM_001008393	NM_020437	NM_144607	NM_002451	NM_078483	NM_016395	NM_001032296
NM_014053	NM_198402	NM_021227	NM_145012	NM_020437	NM_031266	NM_013231	NM_001010990	NM_022730
NM_145754	NM_002740	NM_014023	NM_030940	NM_173468	NM_004567	NM_007371	NM_144693	NM_015878
NM_001009991	NM_001031706	NM_001003683	NM_013339	NM_144728	NM_001102	NM_007192	NM_014949	NM_001694
NM_017570	NM_000291	NM_020898	NM_033407	NM_001659	NM_015075	NM_016004	NM_019109	NM_017617
NM_032140	NM_014921	NM_016121	NM_001009566	NM_012482	NM_138793	NM_005828	NM_000877	NM_018416
NM_002465	NM_002940	NM_001814	NM_173359	NM_020751	NM_000120	NM_020751	NM_002350	NM_006035
NM_153211	NM_018475	NM_024652	NM_018170	NM_005520	NM_173490	NM_012432	NM_014691	NM_001895
NM_000316	NM_032357	NM_017549	NM_014011	NM_198401	NM_025126	NM_013386	NM_004893	NM_015001
NM_138476	NM_152644	NM_024698	NM_005724	NM_002581	NM_031314	NM_007085	NM_020744	NM_178014
NM_024769	NM_018238	NM_006827	NM_018688	NM_016355	NM_020338	NM_019843	NM_022770	NM_006283
NM_016494	NM_012106	NM_005957	NM_001009993	NM_006526	NM_004043	NM_014949	NM_022818	NM_153322
NM_005239	NM_001008529	NM_006815	NM_183359	NM_002714	NM_016133	NM_024657	NM_000416	NM_014851
NM_153824	NM_003478	NM_020924	NM_001017421	NM_004655	NM_018715	NM_007259	NM_001101	NM_007008
NM_181877	NM_022748	NM_001439	NM_0181170	NM_018509	NM_002896	NM_003114	NM_012317	NM_014641
NM_001014839	NM_018685	NM_017626	NM_018352	NM_152495	NM_004943	NM_003190	NM_001025080	NM_030981
NM_153813	NM_153267	NM_001006636	NM_014056	NM_033396	NM_199203	NM_032558	NM_018062	NM_006749
NM_004565	NM_058216	NM_000719	NM_006020	NM_007198	NM_014760	NM_014521	NM_152310	NM_000366
NM_001350	NM_005724	NM_152271	NM_001439	NM_018348	NM_004811	NM_138571	NM_006387	NM_006178
NM_016582	NM_018085	NM_001009555	NM_005544	NM_006329	NM_005567	NM_006312	NM_198567	NM_006943
NM_020847	NM_006985	NM_145263	NM_153018	NM_015231	NM_033550	NM_018025	NM_003496	NM_017491
NM_031915	NM_018316	NM_002583	NM_014458	NM_017771	NM_001150	NM_022450	NM_001731	NM_006054
NM_020153	NM_181787	NM_005576	NM_020673	NM_014570	NM_015367	NM_001845	NM_139281	NM_000271
NM_005701	NM_006554	NM_012286	NM_012475	NM_001013676	NM_014272	NM_021626	NM_002210	NM_005271
NM_024319	NM_005819	NM_002304	NM_138395	NM_005228	NM_014851	NM_006554	NM_003425	NM_023080
NM_020371	NM_001068	NM_001924	NM_020921	NM_006449	NM_013249	NM_030881	NM_004892	NM_031203
NM_019023	NM_020746	NM_002456	NM_182648	NM_024649	NM_002537	NM_018367	NM_001515	NM_014713
NM_001916	NM_0164891	NM_175085	NM_005542	NM_152999	NM_003062	NM_001024646	NM_002048	NM_003928
NM_022908	NM_005188	NM_002852	NM_012219	NM_005171	NM_020531	NM_133377	NM_018433	NM_020351
NM_080820	NM_020412	NM_005006	NM_002661	NM_024295	NM_018045	NM_007099	NM_001290	NM_004613
NM_145030	NM_007073	NM_199168	NM_020909	NM_006212	NM_003045	NM_003486	NM_014892	NM_006602
NM_174891	NM_024312	NM_003068	NM_001253	NM_004302	NM_001010924	NM_015622	NM_016097	NM_145693
NM_000998	NM_003406	NM_003257	NM_018079	NM_021943	NM_001002296	NM_014988	NM_133503	NM_002070
NM_021143	NM_005530	NM_004336	NM_153260	NM_004249	NM_020151	NM_170601	NM_003791	NM_003047
NM_004183	NM_152289	NM_018137	NM_001233	NM_005328	NM_024832	NM_004075	NM_177974	NM_001410
NM_018393	NM_001031685	NM_018042	NM_001798	NM_031284	NM_032017	NM_016277	NM_032256	NM_003744
NM_147148	NM_000399	NM_014815	NM_014764	NM_004311	NM_020765	NM_020382	NM_001008239	NM_002193
NM_030877	NM_019843	NM_138473	NM_001018040	NM_019011	NM_017727	NM_144578	NM_032284	NM_006445
NM_012437	NM_032800	NM_001024847	NM_016315	NM_003022	NM_005110	NM_001798	NM_015245	NM_003887
NM_130471	NM_053024	NM_005032	NM_005006	NM_002719	NM_001996	NM_015577	NM_003664	NM_006099
NM_003942	NM_152271	NM_018182	NM_006415	NM_015254	NM_024331	NM_144728	NM_018407	NM_201554
NM_006066	NM_033389	NM_001024674	NM_182757	NM_005151	NM_012478	NM_017582	NM_002061	NM_153831
NM_033271	NM_002016	NM_004655	NM_005407	NM_018139	NM_006765	NM_033392	NM_014947	NM_022170
NM_005804	NM_182972	NM_177972	NM_021105	NM_032424	NM_018222	NM_032870	NM_005316	NM_201274
NM_139030	NM_018139	NM_175061	NM_033274	NM_198321	NM_014039	NM_001660	NM_017637	NM_033121
NM_032786	NM_014178	NM_022817	NM_014028	NM_022753	NM_000365	NM_003100	NM_001001715	NM_015155
NM_145288	NM_207012	NM_145297	NM_020141	NM_052932	NM_005514	NM_003074	NM_019594	NM_078481
NM_003323	NM_003589	NM_001871	NM_032838	NM_033260	NM_006367	NM_207380	NM_152523	NM_005194
NM_030981	NM_000945	NM_152308	NM_007235	NM_022763	NM_014437	NM_006391	NM_033339	NM_004739
NM_173815	NM_175895	NM_004578	NM_033542	NM_003477	NM_021188	NM_018686	NM_078473	NM_001098
NM_003755	NM_014445	NM_003791	NM_022154	NM_012151	NM_024092	NM_020152	NM_004705	NM_014761
NM_001001827	NM_177972	NM_003406	NM_005642	NM_003074	NM_001343	NM_016072	NM_005667	NM_025125
NM_021934	NM_002783	NM_022123	NM_001240	NM_207577	NM_016032	NM_000100	NM_020673	NM_014380
NM_000177	NM_145110	NM_005458	NM_014447	NM_182972	NM_001300	NM_016608	NM_152758	NM_005370
NM_002856	NM_014483	NM_003981	NM_006055	NM_014287	NM_003380	NM_004674	NM_019035	NM_005897
NM_175614	NM_012207	NM_182682	NM_005493	NM_022899	NM_148919	NM_003473	NM_000318	NM_030579
NM_019103	NM_015213	NM_001008529	NM_001257	NM_014800	NM_019043	NM_014887	NM_000194	NM_021962
NM_001010878	NM_001008239	NM_004379	NM_022067	NM_003010	NM_152828	NM_015904	NM_000917	NM_018699
NM_022750	NM_001024732	NM_001343	NM_006371	NM_024563	NM_145263	NM_001068	NM_015608	NM_007191
NM_016429	NM_015864	NM_000337	NM_020379	NM_006791	NM_015908	NM_032320	NM_018710	NM_000113
NM_024093	NM_005345	NM_025208	NM_003425	NM_005345	NM_001554	NM_001001998	NM_144973	NM_020814
NM_145059	NM_004804	NM_021975	NM_000891	NM_016097	NM_003766	NM_001924	NM_021930	NM_001033053
NM_020703	NM_000917	NM_022753	NM_181706	NM_016486	NM_080649	NM_001418	NM_014065	NM_014183
NM_020385	NM_032900	NM_175882	NM_012151	NM_000051	NM_002317	NM_000945	NM_017994	NM_006640
NM_018262	NM_002193	NM_033396	NM_021137	NM_016952	NM_177422	NM_014615	NM_012325	NM_013373
NM_017856	NM_033394	NM_178154	NM_080651	NM_015957	NM_153273	NM_020830	NM_014637	NM_004342
NM_001014764	NM_145863	NM_014011	NM_170750	NM_014671	NM_024339	NM_022832	NM_020120	NM_006643
NM_153354	NM_006196	NM_024642	NM_020066	NM_018433	NM_007350	NM_015041	NM_032433	NM_181804
NM_198527	NM_012388	NM_014795	NM_006389	NM_000274	NM_020663	NM_021033	NM_017877	NM_021227
NM_001703	NM_021643	NM_001620	NM_004526	NM_152308	NM_144697	NM_004454	NM_007080	NM_016376
NM_033008	NM_004869	NM_005520	NM_020412	NM_033083	NM_003624	NM_013398	NM_052903	NM_000093
NM_006484	NM_025158	NM_025135	NM_032907	NM_030911	NM_014583	NM_018444	NM_002881	NM_004168
NM_004563	NM_000599	NM_015203	NM_006904	NM_016357	NM_022450	NM_014913	NM_016078	NM_152740
NM_001467	NM_198080	NM_001415	NM_004906	NM_018263	NM_153322	NM_006640	NM_002524	NM_021154
NM_000024	NM_001010983	NM_003819	NM_014487	NM_024721	NM_005334	NM_016203	NM_152581	NM_006148
NM_016034	NM_025217	NM_013961	NM_020348	NM_173485	NM_001613	NM_020200	NM_020443	NM_139279
NM_003943	NM_000274	NM_006457	NM_014654	NM_145715	NM_016404	NM_004643	NM_015477	NM_001010915
NM_014623	NM_153186	NM_001002257	NM_199003	NM_012271	NM_006769	NM_005766	NM_017774	NM_001743
NM_016456	NM_001731	NM_001024668	NM_003877	NM_019102	NM_004429	NM_014802	NM_017771	NM_006810
NM_052935	NM_153682	NM_014905	NM_031283	NM_003840	NM_014516	NM_024867	NM_139201	NM_001873
NM_006044	NM_004620	NM_017415	NM_015265	NM_015094	NM_005229	NM_173570	NM_025239	NM_003373
NM_017984	NM_003407	NM_006750	NM_003222	NM_032832	NM_002720	NM_001417	NM_017450	NM_023015
NM_138781	NM_006371	NM_032637	NM_005680	NM_004776	NM_152557	NM_001450	NM_053024	NM_015892
NM_182640	NM_015275	NM_017774	NM_152902	NM_004237	NM_014874	NM_024843	NM_024063	NM_019040
NM_007112	NM_002006	NM_138571	NM_018085	NM_177974	NM_017798	NM_000189	NM_030949	NM_003663
NM_006844	NM_021946	NM_022347	NM_053042	NM_144584	NM_181555	NM_032637	NM_007361	NM_015411
NM_199139	NM_002061	NM_006055	NM_005678	NM_019892	NM_022833	NM_022913	NM_002546	NM_201384
NM_080413	NM_000276	NM_004206	NM_001505	NM_052966	NM_138565	NM_015477	NM_021947	NM_001002914
NM_014652	NM_014640	NM_021979	NM_005450	NM_005338	NM_030782	NM_001032296	NM_002658	NM_153273
NM_002830	NM_006029	NM_001284	NM_001005340	NM_017910	NM_032725	NM_005789	NM_015308	NM_005964
NM_153047	NM_012151	NM_017724	NM_032199	NM_006306	NM_170746	NM_007315	NM_003921	NM_001012479
NM_001930	NM_133265	NM_144584	NM_013262	NM_018407	NM_007174	NM_006209	NM_173473	NM_002396
NM_016369	NM_022066	NM_021058	NM_000983	NM_022366	NM_181804	NM_006851	NM_001822	NM_001065
NM_202468	NM_032681	NM_019558	NM_198321	NM_138352	NM_201274	NM_003217	NM_005038	NM_000100
NM_052995	NM_024698	NM_032320	NM_020754	NM_001224	NM_000543	NM_000138	NM_003884	NM_178523
NM_002792	NM_015622	NM_053024	NM_018444	NM_018984	NM_145658	NM_003373	NM_001881	NM_002576
NM_152777	NM_000877	NM_014689	NM_001204	NM_003496	NM_152931	NM_025125	NM_005270	NM_005567
NM_006370	NM_022658	NM_017998	NM_002430	NM_000693	NM_001469	NM_007174	NM_006714	NM_001456
NM_001002762	NM_013374	NM_032433	NM_021629	NM_004520	NM_198334	NM_004798	NM_152238	NM_000428
NM_014417	NM_020211	NM_018085	NM_000337	NM_181501	NM_002266	NM_006334	NM_032354	NM_007048
NM_152353	NM_003257	NM_170750	NM_004780	NM_022465	NM_003102	NM_020905	NM_013451	NM_006202
NM_152600	NM_181803	NM_025160	NM_000950	NM_003017	NM_005657	NM_001001974	NM_003584	NM_000474
NM_012138	NM_170750	NM_000236	NM_145254	NM_005828	NM_007026	NM_005348	NM_014165	NM_015378
NM_198149	NM_004417	NM_004595	NM_002160	NM_006527	NM_017740	NM_181701	NM_003407	NM_021975
NM_022365	NM_003425	NM_153261	NM_019040	NM_004177	NM_006373	NM_000022	NM_016238	NM_153348
NM_017999	NM_006067	NM_033425	NM_024563	NM_183382	NM_012392	NM_002087	NM_005644	NM_020898
NM_003492	NM_181308	NM_032800	NM_178820	NM_016395	NM_181738	NM_021137	NM_003017	NM_001010927
NM_001050	NM_003155	NM_033407	NM_001101	NM_000600	NM_020200	NM_003859	NM_000291	NM_020151
NM_012139	NM_006530	NM_020452	NM_001762	NM_183414	NM_000122	NM_017813	NM_024809	NM_016605
NM_012203	NM_020311	NM_025138	NM_052913	NM_001010891	NM_002116	NM_001614	NM_194281	NM_001233
NM_172089	NM_004772	NM_147161	NM_006791	NM_006452	NM_032704	NM_019014	NM_025246	NM_006510
NM_002246	NM_145176	NM_003633	NM_018433	NM_033407	NM_015449	NM_002077	NM_002086	NM_020755
NM_175066	NM_199168	NM_006805	NM_015602	NM_005373	NM_016605	NM_014290	NM_001031848	NM_001003810
NM_005275	NM_000961	NM_022373	NM_020806	NM_014517	NM_005920	NM_015367	NM_014929	NM_002306
NM_017881	NM_031372	NM_013310	NM_003687	NM_032436	NM_201277	NM_005095	NM_004034	NM_016205
NM_001008657	NM_002160	NM_000108	NM_015094	NM_004370	NM_152563	NM_016451	NM_001031706	NM_003144
NM_198943	NM_021242	NM_002345	NM_000189	NM_018475	NM_001005861	NM_017670	NM_018182	NM_175852
NM_017421	NM_024633	NM_014736	NM_138444	NM_152270	NM_015627	NM_017811	NM_021643	NM_006454
NM_024014	NM_024779	NM_001724	NM_001431	NM_018426	NM_003899	NM_001949	NM_007047	NM_020199
NM_030962	NM_006646	NM_001981	NM_153361	NM_004064	NM_006590	NM_145752	NM_006323	NM_001119
NM_005234	NM_014487	NM_147194	NM_144693	NM_015509	NM_004403	NM_001848	NM_001791	NM_032320
NM_006331	NM_173824	NM_005230	NM_012207	NM_015601	NM_001012614	NM_004096	NM_002859	NM_002778
NM_001388	NM_019061	NM_000021	NM_006750	NM_016263	NM_020190	NM_001743	NM_032927	NM_007144
NM_022142	NM_015005	NM_005022	NM_030759	NM_006738	NM_003345	NM_004780	NM_182972	NM_152393
NM_002154	NM_002345	NM_152517	NM_144607	NM_001233	NM_024820	NM_005917	NM_001006636	NM_014655
NM_000076	NM_024165	NM_145266	NM_005819	NM_015361	NM_152417	NM_003684	NM_002444	NM_018368
NM_020650	NM_006405	NM_153331	NM_024843	NM_001010982	NM_002863	NM_003928	NM_139313	NM_201277
NM_001032372	NM_005100	NM_018087	NM_006405	NM_170750	NM_030806	NM_014294	NM_018184	NM_012250
NM_006586	NM_003400	NM_003309	NM_018426	NM_003664	NM_052940	NM_018386	NM_013283	NM_006868
NM_001025204	NM_015485	NM_003846	NM_003155	NM_002869	NM_014604	NM_007026	NM_016620	NM_002833
NM_021951	NM_175061	NM_016339	NM_014267	NM_001358	NM_015125	NM_006807	NM_021212	NM_002137
NM_016458	NM_023931	NM_003816	NM_015153	NM_001707	NM_004691	NM_017934	NM_015143	NM_021238
NM_033212	NM_004776	NM_015622	NM_003304	NM_001880	NM_014798	NM_005334	NM_005333	NM_015527
NM_014172	NM_007363	NM_012479	NM_175636	NM_003687	NM_012110	NM_015942	NM_012424	NM_002211
NM_001005374	NM_139035	NM_018183	NM_199436	NM_182977	NM_003145	NM_018109	NM_004946	NM_033405
NM_017459	NM_003246	NM_012319	NM_004093	NM_001730	NM_002414	NM_003971	NM_032436	NM_138447
NM_001005465	NM_002755	NM_013374	NM_002767	NM_003406	NM_020185	NM_006409	NM_014287	NM_018064
NM_004092	NM_033089	NM_183001	NM_000346	NM_003909	NM_001527	NM_012093	NM_021204	NM_015033
NM_014346	NM_016277	NM_015345	NM_001012288	NM_015938	NM_054013	NM_152608	NM_203305	NM_012137
NM_024570	NM_003101	NM_004420	NM_017723	NM_173514	NM_021202	NM_006621	NM_001008938	NM_003290
NM_031466	NM_198252	NM_017445	NM_006307	NM_005667	NM_054034	NM_001009993	NM_006209	NM_018386
NM_207351	NM_003236	NM_001029859	NM_014901	NM_017413	NM_012212	NM_001017980	NM_175085	NM_003255
NM_032034	NM_004836	NM_207645	NM_005536	NM_004331	NM_014248	NM_031905	NM_020803	NM_031453
NM_001010851	NM_002577	NM_001429	NM_181787	NM_025074	NM_014059	NM_014292	NM_024334	NM_177401
NM_032179	NM_032139	NM_148923	NM_014287	NM_012288	NM_001711	NM_015391	NM_004311	NM_014225
NM_015160	NM_015265	NM_002501	NM_004830	NM_024843	NM_013373	NM_006079	NM_001798	NM_007285
NM_012143	NM_053067	NM_020197	NM_153826	NM_005279	NM_031286	NM_000917	NM_016622	NM_001280
NM_001001502	NM_000602	NM_022130	NM_024881	NM_002725	NM_006931	NM_025239	NM_018079	NM_032493
NM_207459	NM_007353	NM_016081	NM_005401	NM_015622	NM_005803	NM_018307	NM_018979	NM_007326
NM_024684	NM_004578	NM_024955	NM_014940	NM_012106	NM_002373	NM_138357	NM_003404	NM_012329
NM_015459	NM_022164	NM_030777	NM_017994	NM_013374	NM_030954	NM_033426	NM_001154	NM_198889
NM_024321	NM_007371	NM_006985	NM_152434	NM_206907	NM_001004726	NM_015885	NM_014575	NM_004105
NM_182627	NM_000719	NM_002945	NM_153000	NM_015275	NM_153649	NM_024652	NM_152380	NM_022121
NM_007346	NM_002264	NM_198700	NM_153186	NM_005032	NM_032300	NM_003651	NM_001001974	NM_031314
NM_006466	NM_032199	NM_003474	NM_153261	NM_006371	NM_000991	NM_006052	NM_014847	NM_001005861
NM_017622	NM_016546	NM_003618	NM_001635	NM_006106	NM_021219	NM_001033505	NM_020300	NM_015466
NM_006666	NM_006389	NM_004447	NM_207332	NM_002764	NM_025196	NM_016353	NM_002430	NM_022833
NM_198867	NM_003131	NM_197957	NM_001146	NM_021643	NM_003174	NM_021100	NM_018368	NM_001218
NM_004913	NM_002456	NM_005308	NM_002086	NM_014949	NM_004687	NM_144563	NM_020463	NM_015447
NM_014140	NM_016316	NM_019843	NM_006016	NM_207012	NM_003768	NM_020850	NM_003247	NM_007279
NM_199122	NM_004896	NM_007319	NM_005032	NM_001029859	NM_004716	NM_138792	NM_018206	NM_006698
NM_002014	NM_182977	NM_018198	NM_003745	NM_014758	NM_013232	NM_017724	NM_032900	NM_032562
NM_016011	NM_133493	NM_005513	NM_006526	NM_030927	NM_000516	NM_018184	NM_012106	NM_032623
NM_001005417	NM_006106	NM_003133	NM_005398	NM_080867	NM_206926	NM_005151	NM_007355	NM_002526
NM_173685	NM_014793	NM_152380	NM_018103	NM_016651	NM_001826	NM_021979	NM_006007	NM_173079
NM_016199	NM_130395	NM_015278	NM_058216	NM_014166	NM_004344	NM_006389	NM_004380	NM_005801
NM_002513	NM_000983	NM_001071	NM_017851	NM_014810	NM_015379	NM_002340	NM_005786	NM_001387
NM_000637	NM_021947	NM_020194	NM_012106	NM_0164891	NM_004964	NM_177989	NM_006242	NM_080792
NM_013260	NM_020932	NM_014275	NM_001935	NM_015541	NM_004308	NM_016128	NM_001814	NM_003858
NM_001988	NM_015340	NM_001005526	NM_004520	NM_015534	NM_022151	NM_020162	NM_001024649	NM_001450
NM_145080	NM_001025356	NM_023034	NM_012288	NM_033381	NM_005630	NM_021145	NM_000332	NM_001018108
NM_020062	NM_199511	NM_001901	NM_152238	NM_021238	NM_015840	NM_015397	NM_004096	NM_016598
NM_024722	NM_005637	NM_017751	NM_015143	NM_021809	NM_005851	NM_205855	NM_006936	NM_170692
NM_018161	NM_005116	NM_016085	NM_006037	NM_017998	NM_014380	NM_003744	NM_032861	NM_031444
NM_203413	NM_000262	NM_006079	NM_000850	NM_001011553	NM_006077	NM_032857	NM_025132	NM_006367
NM_022758	NM_001723	NM_152265	NM_005853	NM_000190	NM_001379	NM_020300	NM_006196	NM_032525
NM_016046	NM_014962	NM_001013644	NM_004733	NM_080841	NM_037370	NM_021159	NM_015878	NM_005219
NM_002626	NM_003330	NM_007362	NM_020751	NM_004804	NM_001269	NM_147156	NM_018328	NM_152931
NM_138797	NM_012089	NM_203418	NM_021826	NM_152363	NM_015289	NM_198197	NM_012193	NM_201414
NM_003365	NM_018407	NM_032811	NM_000474	NM_198088	NM_139062	NM_017905	NM_002823	NM_182507
NM_003656	NM_145794	NM_203351	NM_006091	NM_016076	NM_172020	NM_152380	NM_183359	NM_003347
NM_004204	NM_001033556	NM_054012	NM_001283	NM_002748	NM_000366	NM_004460	NM_004897	NM_022735
NM_183231	NM_022101	NM_003664	NM_000235	NM_001012752	NM_006663	NM_001006636	NM_001105	NM_003400
NM_014261	NM_002376	NM_001661	NM_014671	NM_002874	NM_207645	NM_015957	NM_018178	NM_002880
NM_007189	NM_001417	NM_003928	NM_004075	NM_018164	NM_019848	NM_032285	NM_014396	NM_001379
NM_024632	NM_003844	NM_019613	NM_006185	NM_006391	NM_014183	NM_144498	NM_016001	NM_020150
NM_001012981	NM_033083	NM_020914	NM_004516	NM_032342	NM_018090	NM_002070	NM_004494	NM_031266
NM_023935	NM_002569	NM_003286	NM_031372	NM_000602	NM_182470	NM_000449	NM_032985	NM_025126
NM_020170	NM_206839	NM_002317	NM_020452	NM_003330	NM_004181	NM_006988	NM_002882	NM_006224
NM_033294	NM_003632	NM_006807	NM_012304	NM_001007075	NM_173854	NM_003496	NM_005896	NM_005647
NM_024083	NM_014275	NM_006828	NM_002688	NM_006067	NM_153705	NM_001002799	NM_014445	NM_016433
NM_014017	NM_031431	NM_031407	NM_001024847	NM_021105	NM_181724	NM_004947	NM_002857	NM_203417
NM_001001975	NM_003594	NM_003131	NM_152310	NM_001008938	NM_000175	NM_018649	NM_014048	NM_006888
NM_152735	NM_006801	NM_015044	NM_015955	NM_012089	NM_019080	NM_153703	NM_138571	NM_006570
NM_018358	NM_021975	NM_014241	NM_002726	NM_005342	NM_003373	NM_015602	NM_019892	NM_003045
NM_015922	NM_021255	NM_003870	NM_144584	NM_015382	NM_001514	NM_002880	NM_005401	NM_015035
NM_201650	NM_012080	NM_007235	NM_001018115	NM_002133	NM_014286	NM_016002	NM_001031707	NM_080604
NM_016059	NM_001001974	NM_031492	NM_032342	NM_001010888	NM_024792	NM_014765	NM_152574	NM_005911
NM_005337	NM_005128	NM_002061	NM_000376	NM_006389	NM_022495	NM_002890	NM_022748	NM_001102
NM_007357	NM_000153	NM_003659	NM_022366	NM_015143	NM_007279	NM_013263	NM_005875	NM_004376
NM_004119	NM_012475	NM_012151	NM_004241	NM_002967	NM_005759	NM_021218	NM_020801	NM_015508
NM_178145	NM_145119	NM_007259	NM_014758	NM_053024	NM_018683	NM_004958	NM_004234	NM_004674
NM_003793	NM_020751	NM_198830	NM_007259	NM_003407	NM_016645	NM_207332	NM_144629	NM_004409
NM_016256	NM_182642	NM_001904	NM_006714	NM_001753	NM_014038	NM_002948	NM_014023	NM_173475
NM_024658	NM_016848	NM_021217	NM_170768	NM_020755	NM_003565	NM_014244	NM_016272	NM_012433
NM_004941	NM_145716	NM_206963	NM_024072	NM_016073	NM_013306	NM_021645	NM_018948	NM_198531
NM_024041	NM_006296	NM_002524	NM_153707	NM_022776	NM_005348	NM_201281	NM_002781	NM_003348
NM_033386	NM_152335	NM_004791	NM_003462	NM_003400	NM_004219	NM_001823	NM_024625	NM_032637
NM_021944	NM_004595	NM_001020820	NM_003505	NM_006464	NM_013446	NM_007008	NM_005904	NM_022737
NM_174889	NM_002826	NM_017593	NM_153689	NM_007200	NM_006854	NM_004892	NM_004772	NM_015194
NM_024308	NM_005730	NM_015285	NM_006039	NM_019895	NM_004905	NM_018078	NM_032320	NM_006358
NM_018310	NM_000235	NM_145716	NM_016586	NM_133503	NM_003190	NM_015260	NM_004718	NM_016404
NM_005987	NM_002868	NM_014608	NM_016447	NM_152344	NM_014740	NM_007062	NM_004663	NM_005229
NM_207316	NM_020948	NM_002518	NM_198567	NM_015430	NM_001630	NM_001521	NM_007111	NM_031954
NM_015506	NM_005957	NM_004342	NM_003184	NM_152758	NM_000895	NM_002038	NM_012433	NM_013446
NM_138418	NM_030961	NM_177538	NM_000291	NM_001024847	NM_033296	NM_004766	NM_005730	NM_018045
NM_003006	NM_033285	NM_032810	NM_032040	NM_018375	NM_006369	NM_005120	NM_021999	NM_003029
NM_004070	NM_004992	NM_014943	NM_178588	NM_015995	NM_015511	NM_006359	NM_145244	NM_003598
NM_015380	NM_002359	NM_015535	NM_005707	NM_001003794	NM_003966	NM_013286	NM_005188	NM_001360
NM_031432	NM_002648	NM_021991	NM_005475	NM_005458	NM_005997	NM_004339	NM_014602	NM_001013840
NM_015905	NM_139122	NM_001659	NM_015534	NM_005339	NM_014041	NM_001920	NM_031458	NM_000405
NM_003434	NM_001020820	NM_012193	NM_004380	NM_170695	NM_003449	NM_004791	NM_015079	NM_005384
NM_022163	NM_004040	NM_001031699	NM_001009555	NM_004705	NM_006099	NM_020189	NM_016340	NM_203344
NM_016542	NM_030629	NM_025125	NM_145014	NM_022740	NM_138578	NM_006206	NM_024165	NM_022157
NM_003953	NM_001400	NM_001011713	NM_004655	NM_003257	NM_000701	NM_031490	NM_016025	NM_153693
NM_145267	NM_017898	NM_001290	NM_004287	NM_017774	NM_015343	NM_006054	NM_005168	NM_001009551
NM_002694	NM_012325	NM_170746	NM_001013637	NM_007220	NM_198589	NM_005896	NM_033001	NM_001802
NM_032518	NM_022495	NM_000801	NM_002629	NM_080797	NM_001923	NM_018448	NM_033191	NM_004787
NM_015698	NM_005839	NM_032832	NM_005627	NM_006999	NM_032344	NM_003174	NM_058182	NM_006826
NM_017871	NM_030927	NM_016622	NM_006565	NM_003504	NM_003770	NM_001219	NM_016952	NM_012249
NM_016594	NM_006452	NM_014774	NM_170773	NM_001889	NM_002802	NM_000318	NM_001003790	NM_004905
NM_052875	NM_013451	NM_002506	NM_020935	NM_018178	NM_178225	NM_003444	NM_006464	NM_001402
NM_024040	NM_030939	NM_145212	NM_013263	NM_004093	NM_001014979	NM_133451	NM_054026	NM_004238
NM_014285	NM_003022	NM_000917	NM_001520	NM_015465	NM_016326	NM_025179	NM_198252	NM_005279
NM_002611	NM_015957	NM_001007156	NM_145263	NM_033285	NM_013366	NM_002527	NM_005614	NM_004459
NM_021734	NM_001924	NM_138609	NM_015554	NM_003686	NM_020679	NM_013250	NM_032102	NM_003136
NM_017688	NM_002161	NM_002077	NM_032663	NM_006366	NM_006085	NM_005759	NM_207332	NM_003685
NM_182491	NM_018103	NM_017437	NM_002033	NM_017745	NM_153690	NM_003029	NM_006307	NM_133635
NM_004656	NM_001159	NM_003915	NM_144726	NM_032357	NM_152323	NM_002373	NM_020152	NM_000051
NM_003789	NM_080687	NM_024331	NM_021149	NM_005401	NM_000747	NM_016376	NM_001009566	NM_012179
NM_006833	NM_007349	NM_018178	NM_004804	NM_024698	NM_003959	NM_017454	NM_018085	NM_020428
NM_017803	NM_173362	NM_003687	NM_003496	NM_018691	NM_000247	NM_004453	NM_022101	NM_005765
NM_020365	NM_020673	NM_032591	NM_016258	NM_018309	NM_031968	NM_003769	NM_003596	NM_025214
NM_001024211	NM_020440	NM_015213	NM_020839	NM_003194	NM_181719	NM_005088	NM_033331	NM_054026
NM_198283	NM_020444	NM_022136	NM_015285	NM_001013649	NM_002759	NM_001618	NM_003131	NM_006861
NM_001827	NM_014758	NM_013354	NM_033198	NM_002582	NM_014017	NM_014570	NM_003971	NM_015529
NM_002419	NM_001017974	NM_144697	NM_001005339	NM_032800	NM_175066	NM_003329	NM_018477	NM_006292
NM_000182	NM_144703	NM_152306	NM_001004422	NM_001003396	NM_017970	NM_005102	NM_002982	NM_002197
NM_001001655	NM_018890	NM_033055	NM_020854	NM_005902	NM_000375	NM_014764	NM_015084	NM_018139
NM_001009937	NM_006307	NM_006738	NM_003720	NM_018079	NM_001316	NM_080841	NM_005880	NM_139045
NM_006659	NM_015995	NM_016355	NM_018164	NM_005868	NM_005031	NM_031203	NM_012333	NM_004486
NM_021004	NM_015642	NM_012242	NM_006938	NM_020162	NM_017807	NM_019007	NM_014689	NM_006854
NM_032487	NM_006391	NM_018222	NM_015282	NM_001357	NM_002925	NM_015955	NM_021238	NM_000319
NM_032816	NM_152998	NM_198567	NM_015601	NM_198566	NM_033557	NM_014044	NM_004417	NM_181738
NM_019056	NM_000824	NM_000100	NM_199053	NM_001018040	NM_007069	NM_015907	NM_003505	NM_015171
NM_024120	NM_015143	NM_019007	NM_018847	NM_022658	NM_033630	NM_024881	NM_006621	NM_003595
NM_007204	NM_015955	NM_002633	NM_032287	NM_005786	NM_173663	NM_013372	NM_032154	NM_022064
NM_031280	NM_002086	NM_052958	NM_173670	NM_032012	NM_174925	NM_001376	NM_006070	NM_012413
NM_006567	NM_005504	NM_178450	NM_020918	NM_001018102	NM_199173	NM_006452	NM_018100	NM_032547
NM_015909	NM_001964	NM_014487	NM_016445	NM_170773	NM_006221	NM_004705	NM_023034	NM_003671
NM_012103	NM_003270	NM_152420	NM_030809	NM_014445	NM_152287	NM_177436	NM_170695	NM_004394
NM_033112	NM_007361	NM_018444	NM_080867	NM_138395	NM_030582	NM_133259	NM_006009	NM_004705
NM_014186	NM_006007	NM_004643	NM_005667	NM_007044	NM_000204	NM_015999	NM_001360	NM_024103
NM_001722	NM_144584	NM_138818	NM_016097	NM_014275	NM_173852	NM_014874	NM_032293	NM_003818
NM_031301	NM_175085	NM_016079	NM_006624	NM_005270	NM_007244	NM_001018108	NM_152791	NM_199246
NM_020963	NM_031407	NM_017905	NM_003074	NM_006405	NM_032799	NM_003085	NM_014325	NM_005494
NM_003116	NM_004290	NM_017919	NM_175886	NM_001031706	NM_001032292	NM_004161	NM_145110	NM_015651
NM_024645	NM_016357	NM_012082	NM_004096	NM_001017424	NM_003627	NM_000551	NM_018199	NM_003039
NM_004045	NM_001681	NM_001010990	NM_003200	NM_018991	NM_018946	NM_014106	NM_023079	NM_003768
NM_203298	NM_019895	NM_182977	NM_012255	NM_001681	NM_006851	NM_007208	NM_145056	NM_030752
NM_000402	NM_021204	NM_022154	NM_012083	NM_181784	NM_006473	NM_031904	NM_022059	NM_024519
NM_002634	NM_004380	NM_016604	NM_022658	NM_014345	NM_003905	NM_002265	NM_016080	NM_001527
NM_016390	NM_030665	NM_015711	NM_003603	NM_012433	NM_016492	NM_003088	NM_003144	NM_003981
NM_021602	NM_058243	NM_012137	NM_001017371	NM_003246	NM_181466	NM_003557	NM_030967	NM_004735
NM_022115	NM_001439	NM_006291	NM_018566	NM_002454	NM_032901	NM_002076	NM_000602	NM_015415
NM_001005567	NM_003075	NM_000368	NM_023079	NM_001520	NM_001013622	NM_015523	NM_014890	NM_024083
NM_013370	NM_005902	NM_013992	NM_004690	NM_018124	NM_001919	NM_017966	NM_002345	NM_152898
NM_019013	NM_015058	NM_006916	NM_003613	NM_006135	NM_199326	NM_033546	NM_004914	NM_001459
NM_052844	NM_017593	NM_002705	NM_002454	NM_133372	NM_017917	NM_014730	NM_030767	NM_001013836
NM_006233	NM_172177	NM_024881	NM_002210	NM_003588	NM_014245	NM_005271	NM_001206	NM_001610
NM_001242	NM_012434	NM_173490	NM_004653	NM_006671	NM_018086	NM_016390	NM_003139	NM_016649
NM_006638	NM_004302	NM_014344	NM_172215	NM_002430	NM_014763	NM_016309	NM_004275	NM_006012
NM_019114	NM_018178	NM_206909	NM_015509	NM_152391	NM_198445	NM_199245	NM_153226	NM_015932
NM_177939	NM_017456	NM_018704	NM_016395	NM_033191	NM_024681	NM_001033080	NM_012180	NM_018834
NM_206910	NM_153274	NM_003505	NM_020967	NM_152665	NM_145111	NM_015456	NM_017811	NM_005946
NM_203288	NM_199053	NM_015533	NM_024907	NM_001101	NM_173640	NM_003730	NM_014846	NM_175568
NM_032592	NM_181784	NM_198086	NM_003870	NM_005480	NM_031424	NM_004593	NM_019613	NM_174855
NM_018994	NM_032436	NM_144988	NM_006212	NM_024814	NM_003517	NM_022842	NM_007319	NM_178225
NM_006779	NM_005107	NM_203414	NM_018571	NM_014921	NM_004460	NM_000163	NM_018040	NM_152516
NM_004053	NM_002714	NM_016608	NM_003246	NM_001031725	NM_003721	NM_001033026	NM_001421	NM_005273
NM_024928	NM_016410	NM_006209	NM_138409	NM_002210	NM_181336	NM_001013699	NM_198129	NM_006349
NM_006221	NM_016339	NM_152705	NM_004417	NM_016475	NM_004381	NM_207291	NM_002669	NM_001031731
NM_020815	NM_006079	NM_018328	NM_000368	NM_024569	NM_002829	NM_021199	NM_014483	NM_005005
NM_153603	NM_016348	NM_019109	NM_002748	NM_014962	NM_181291	NM_006672	NM_000165	NM_001031692
NM_006395	NM_001848	NM_033512	NM_014606	NM_022083	NM_174880	NM_000712	NM_021218	NM_001002027
NM_015926	NM_002780	NM_130439	NM_017724	NM_005871	NM_032916	NM_024341	NM_005596	NM_004688
NM_007254	NM_138437	NM_006405	NM_031246	NM_153186	NM_198055	NM_022107	NM_003626	NM_005701
NM_152398	NM_015602	NM_006701	NM_016952	NM_006532	NM_014366	NM_001909	NM_181427	NM_000178
NM_001031665	NM_018979	NM_014563	NM_002967	NM_003262	NM_005688	NM_015645	NM_001002257	NM_006044
NM_006427	NM_015084	NM_018238	NM_014339	NM_018144	NM_001013663	NM_006978	NM_017658	NM_005804
NM_018008	NM_024654	NM_130830	NM_153331	NM_012199	NM_001014990	NM_005572	NM_024089	NM_018946
NM_018019	NM_001421	NM_207371	NM_015278	NM_000599	NM_003329	NM_057161	NM_005871	NM_006047
NM_144716	NM_080819	NM_044472	NM_015005	NM_153613	NM_001897	NM_031946	NM_001753	NM_024815
NM_017830	NM_021646	NM_003185	NM_019895	NM_006828	NM_001018837	NM_022893	NM_016486	NM_033246
NM_181466	NM_153321	NM_173510	NM_198686	NM_004836	NM_144998	NM_032854	NM_015575	NM_015705
NM_004564	NM_013412	NM_007283	NM_152713	NM_013451	NM_001008703	NM_001005209	NM_001659	NM_000316
NM_138499	NM_021135	NM_005585	NM_020888	NM_174908	NM_005837	NM_018473	NM_001007075	NM_012243
NM_002668	NM_018040	NM_004290	NM_007049	NM_001400	NM_017843	NM_032360	NM_003168	NM_031432
NM_022460	NM_016078	NM_015257	NM_005826	NM_016316	NM_001632	NM_133433	NM_016081	NM_199122
NM_032222	NM_004730	NM_004380	NM_015368	NM_015213	NM_014316	NM_021649	NM_001006610	NM_017838
NM_015969	NM_006763	NM_025152	NM_016076	NM_145212	NM_000700	NM_002704	NM_030666	NM_019110
NM_005227	NM_020127	NM_000189	NM_020444	NM_021204	NM_001001874	NM_006694	NM_001681	NM_199184
NM_001012717	NM_014056	NM_018847	NM_004902	NM_005398	NM_018971	NM_004567	NM_002396	NM_003770
NM_182533	NM_203430	NM_014324	NM_021627	NM_006196	NM_032350	NM_001625	NM_004342	NM_004041
NM_001031731	NM_020960	NM_003404	NM_152380	NM_000877	NM_181464	NM_194324	NM_006472	NM_007244
NM_031937	NM_002501	NM_014758	NM_004549	NM_005613	NM_001250	NM_001013615	NM_015261	NM_024514
NM_153028	NM_001520	NM_152702	NM_033115	NM_003597	NM_016243	NM_006042	NM_003059	NM_198446
NM_001607	NM_197962	NM_004598	NM_017998	NM_005128	NM_016466	NM_004207	NM_003075	NM_020241
NM_025149	NM_001423	NM_030915	NM_004420	NM_004040	NM_002804	NM_001002017	NM_012197	NM_032318
NM_152318	NM_016138	NM_002285	NM_014570	NM_005819	NM_152274	NM_018455	NM_006601	NM_032345
NM_031206	NM_006291	NM_006465	NM_018004	NM_002141	NM_003866	NM_003866	NM_030636	NM_173459
NM_016210	NM_207306	NM_002742	NM_080687	NM_175918	NM_018113	NM_021164	NM_032569	NM_031307
NM_001013626	NM_006547	NM_006391	NM_133264	NM_004814	NM_024033	NM_018269	NM_001423	NM_144778
NM_004510	NM_001873	NM_152748	NM_001001661	NM_002845	NM_013300	NM_152439	NM_003945	NM_016199
NM_021107	NM_033115	NM_005652	NM_016410	NM_005839	NM_017897	NM_001018104	NM_001839	NM_183233
NM_001003725	NM_001006610	NM_002527	NM_013346	NM_183359	NM_001008215	NM_000998	NM_020200	NM_032804
NM_000229	NM_021737	NM_205836	NM_006527	NM_021627	NM_007225	NM_006736	NM_014742	NM_032111
NM_016208	NM_001415	NM_004992	NM_003141	NM_002868	NM_024839	NM_017837	NM_170773	NM_030978
NM_031472	NM_177559	NM_138821	NM_000600	NM_024312	NM_003090	NM_004045	NM_138437	NM_018973
NM_198538	NM_017481	NM_152716	NM_182972	NM_007048	NM_032140	NM_006341	NM_152271	NM_032901
NM_001009932	NM_153361	NM_021137	NM_005374	NM_004620	NM_198289	NM_001013694	NM_001002814	NM_013237
NM_005793	NM_033493	NM_003569	NM_001904	NM_001024649	NM_006261	NM_153813	NM_006353	NM_001024594
NM_033118	NM_025250	NM_206930	NM_173468	NM_018948	NM_213566	NM_005881	NM_145715	NM_138769
NM_024417	NM_001032730	NM_004219	NM_015026	NM_153365	NM_178483	NM_018956	NM_152665	NM_016226
NM_001001939	NM_000459	NM_024569	NM_018139	NM_001278	NM_033504	NM_016034	NM_033394	NM_013370
NM_012337	NM_005742	NM_006855	NM_152665	NM_003896	NM_004204	NM_004176	NM_014913	NM_014233
NM_024033	NM_001010990	NM_014574	NM_006106	NM_004454	NM_032804	NM_024701	NM_015409	NM_207485
NM_001018837	NM_001498	NM_006472	NM_198252	NM_032196	NM_024591	NM_012256	NM_005171	NM_001009938
NM_138805	NM_025113	NM_006185	NM_022748	NM_001024668	NM_001024629	NM_180981	NM_004040	NM_018134
NM_015448	NM_003247	NM_001008938	NM_173501	NM_021645	NM_031459	NM_206902	NM_018412	NM_031301
NM_022128	NM_001765	NM_016644	NM_014711	NM_001240	NM_004548	NM_015913	NM_016101	NM_152456
NM_014931	NM_014570	NM_005627	NM_004776	NM_001013845	NM_203434	NM_001031719	NM_014423	NM_176096
NM_004192	NM_178230	NM_018171	NM_004168	NM_014056	NM_153213	NM_021806	NM_022733	NM_002804
NM_016068	NM_005328	NM_032139	NM_017456	NM_006938	NM_152482	NM_182569	NM_003374	NM_006233
NM_171997	NM_018079	NM_144726	NM_016652	NM_021020	NM_002949	NM_001667	NM_006750	NM_023935
NM_152341	NM_014747	NM_004571	NM_006291	NM_015477	NM_003859	NM_000191	NM_002868	NM_007240
NM_005600	NM_020755	NM_003745	NM_018178	NM_005475	NM_001610	NM_030913	NM_152371	NM_022464
NM_198287	NM_021227	NM_007349	NM_018190	NM_000551	NM_012168	NM_024954	NM_004674	NM_024093
NM_032477	NM_005339	NM_178040	NM_007260	NM_001025356	NM_020677	NM_198334	NM_178014	NM_015684
NM_182690	NM_015147	NM_006045	NM_001008696	NM_005742	NM_032477	NM_015242	NM_016404	NM_001017530
NM_014266	NM_005842	NM_000544	NM_006969	NM_002755	NM_007240	NM_004047	NM_021925	NM_178526
NM_006712	NM_004050	NM_005057	NM_015245	NM_152380	NM_003691	NM_003805	NM_015361	NM_020175
NM_012101	NM_005905	NM_199203	NM_006009	NM_001415	NM_033224	NM_024332	NM_005637	NM_017827
NM_201400	NM_003374	NM_015335	NM_182977	NM_025147	NM_013274	NM_018417	NM_130468	NM_000747
NM_024097	NM_018975	NM_152737	NM_001806	NM_014734	NM_021729	NM_138699	NM_003651	NM_024033
NM_213720	NM_015477	NM_022549	NM_032800	NM_006007	NM_014047	NM_014320	NM_001935	NM_024718
NM_020753	NM_138704	NM_003567	NM_003725	NM_000104	NM_001024211	NM_006486	NM_001025616	NM_001006937
NM_002455	NM_033501	NM_194270	NM_000602	NM_152305	NM_181314	NM_024579	NM_000274	NM_002799
NM_199444	NM_016258	NM_006636	NM_022101	NM_001017392	NM_012460	NM_001364	NM_003068	NM_130781
NM_153497	NM_006212	NM_017811	NM_024652	NM_005517	NM_032305	NM_002799	NM_001009551	NM_007211
NM_199344	NM_004899	NM_139321	NM_002826	NM_015260	NM_015971	NM_001985	NM_001848	NM_145172
NM_031468	NM_080491	NM_005819	NM_139122	NM_199169	NM_024653	NM_013234	NM_021822	NM_199298
NM_032850	NM_173638	NM_032525	NM_153613	NM_014043	NM_032865	NM_173689	NM_004219	NM_198058
NM_003377	NM_000190	NM_173562	NM_030767	NM_015409	NM_017914	NM_001033082	NM_014380	NM_012473
NM_145201	NM_006806	NM_004344	NM_025222	NM_058243	NM_016485	NM_021974	NM_145254	NM_003416
NM_000555	NM_003769	NM_017926	NM_006366	NM_001105	NM_015933	NM_172016	NM_006292	NM_006584
NM_015386	NM_080911	NM_021149	NM_006355	NM_030759	NM_020143	NM_017944	NM_015331	NM_006829
NM_003691	NM_030793	NM_001029891	NM_014674	NM_030967	NM_025075	NM_001002247	NM_014515	NM_198536
NM_138392	NM_020066	NM_006653	NM_031213	NM_004992	NM_005919	NM_018337	NM_207293	NM_018665
NM_015324	NM_014325	NM_000274	NM_015225	NM_033339	NM_1532538	NM_199282	NM_002356	NM_001005417
NM_001002844	NM_000104	NM_014764	NM_152308	NM_032985	NM_004215	NM_007100	NM_024779	NM_024585
NM_152602	NM_016651	NM_000983	NM_001017962	NM_207332	NM_181519	NM_018723	NM_001964	NM_001013663
NM_001014979	NM_001154	NM_017454	NM_002518	NM_080911	NM_177925	NM_015872	NM_002661	NM_033082
NM_016492	NM_012271	NM_152267	NM_014023	NM_001752	NM_001202	NM_002830	NM_007285	NM_021158
NM_182905	NM_001357	NM_152391	NM_004995	NM_015955	NM_001013680	NM_022149	NM_016613	NM_015899
NM_006293	NM_005612	NM_001660	NM_005828	NM_001417	NM_016114	NM_004172	NM_001002296	NM_022488
NM_199184	NM_003829	NM_014450	NM_003075	NM_006296	NM_005556	NM_033397	NM_198189	NM_001571
NM_030811	NM_004814	NM_016287	NM_005899	NM_024779	NM_207340	NM_080430	NM_032051	NM_052873
NM_007243	NM_001620	NM_022748	NM_018948	NM_014051	NM_016066	NM_199165	NM_032195	NM_003778
NM_152486	NM_000600	NM_020240	NM_004992	NM_006241	NM_014008	NM_022821	NM_001024668	NM_004030
NM_182970	NM_194071	NM_001010919	NM_001924	NM_024881	NM_016039	NM_006044	NM_003769	NM_024591
NM_022078	NM_001920	NM_176806	NM_006209	NM_006806	NM_020824	NM_000101	NM_152270	NM_001017927
NM_032732	NM_001008712	NM_005067	NM_015409	NM_033055	NM_145748	NM_005324	NM_004064	NM_001983
NM_017843	NM_030881	NM_005392	NM_000262	NM_015864	NM_033028	NM_020411	NM_001620	NM_144631
NM_004322	NM_007220	NM_033493	NM_020353	NM_002145	NM_006349	NM_001012984	NM_006717	NM_001001795
NM_018224	NM_015493	NM_013346	NM_001417	NM_014784	NM_033363	NM_002557	NM_005471	NM_033557
NM_174925	NM_012413	NM_014056	NM_018319	NM_152490	NM_003907	NM_207351	NM_001007102	NM_000137
NM_018946	NM_007198	NM_012199	NM_002734	NM_002403	NM_006885	NM_001015884	NM_006636	NM_015296
NM_006505	NM_018368	NM_004893	NM_032436	NM_032320	NM_032318	NM_145059	NM_031989	NM_001175
NM_022821	NM_001358	NM_017787	NM_207012	NM_174930	NM_016129	NM_032795	NM_002518	NM_007344
NM_017827	NM_206963	NM_000669	NM_006038	NM_022748	NM_005319	NM_015545	NM_002755	NM_016020
NM_207115	NM_144693	NM_133264	NM_016134	NM_014550	NM_032683	NM_000972	NM_148923	NM_017841
NM_000101	NM_006936	NM_052903	NM_001017974	NM_003165	NM_015679	NM_004656	NM_001031684	NM_174887
NM_207422	NM_005493	NM_015172	NM_015102	NM_001822	NM_014424	NM_007126	NM_178438	NM_138783
NM_018053	NM_033551	NM_004225	NM_007080	NM_012325	NM_002493	NM_012413	NM_016128	NM_139016
NM_031968	NM_032510	NM_002858	NM_014970	NM_007259	NM_006287	NM_178159	NM_015345	NM_001436
NM_145806	NM_021235	NM_015084	NM_001402	NM_014409	NM_025267	NM_016199	NM_000945	NM_032970
NM_004395	NM_152713	NM_012212	NM_024649	NM_181803	NM_016199	NM_018262	NM_006348	NM_024014
NM_007233	NM_001614	NM_000351	NM_176870	NM_012434	NM_144679	NM_018379	NM_018317	NM_003730
NM_001919	NM_021137	NM_144650	NM_018890	NM_003425	NM_022044	NM_016591	NM_024569	NM_004146
NM_152339	NM_016004	NM_138452	NM_130783	NM_145119	NM_022163	NM_198283	NM_003620	NM_018337
NM_014472	NM_006472	NM_001178	NM_024007	NM_015084	NM_053005	NM_001032374	NM_005077	NM_181597
NM_006739	NM_015243	NM_006312	NM_033238	NM_007192	NM_016467	NM_012265	NM_022495	NM_005693
NM_173618	NM_031989	NM_052965	NM_006167	NM_003075	NM_020233	NM_014435	NM_004691	NM_016497
NM_016020	NM_152305	NM_001033028	NM_144628	NM_014454	NM_006896	NM_080476	NM_013346	NM_005533
NM_018337	NM_021633	NM_019091	NM_022783	NM_003688	NM_022768	NM_019085	NM_004344	NM_018161
NM_173512	NM_020792	NM_016297	NM_004324	NM_003632	NM_032302	NM_004181	NM_003155	NM_017722
NM_007155	NM_004096	NM_000570	NM_004836	NM_003846	NM_080417	NM_001012665	NM_014962	NM_003905
NM_012112	NM_005614	NM_001854	NM_012267	NM_016078	NM_017607	NM_002419	NM_012210	NM_014462
NM_018438	NM_005686	NM_058243	NM_002444	NM_003450	NM_207346	NM_000204	NM_181308	NM_020411
NM_001236	NM_012250	NM_032895	NM_002398	NM_014305	NM_024922	NM_203298	NM_004598	NM_178314
NM_018320	NM_006621	NM_012102	NM_152391	NM_004096	NM_000713	NM_021018	NM_015569	NM_002960
NM_022648	NM_006990	NM_015684	NM_031957	NM_003884	NM_145720	NM_016063	NM_004661	NM_147160
NM_139075	NM_033274	NM_181725	NM_005345	NM_001007246	NM_032111	NM_022549	NM_003846	NM_018663
NM_198530	NM_005119	NM_001005333	NM_002859	NM_002826	NM_001687	NM_003443	NM_194430	NM_001001975
NM_144765	NM_014949	NM_006646	NM_181784	NM_139201	NM_057174	NM_016732	NM_001690	NM_004375
NM_032627	NM_005786	NM_134470	NM_022473	NM_014339	NM_152743	NM_177405	NM_002145	NM_030929
NM_1532538	NM_003496	NM_002056	NM_001010990	NM_015383	NM_014018	NM_018418	NM_002294	NM_004564
NM_197956	NM_003017	NM_020870	NM_002451	NM_031492	NM_002237	NM_001007593	NM_000126	NM_001031703
NM_003733	NM_002444	NM_152387	NM_183414	NM_004419	NM_181528	NM_014110	NM_015002	NM_021077
NM_004186	NM_002845	NM_004727	NM_021217	NM_032846	NM_024830	NM_018658	NM_014921	NM_005675
NM_001031703	NM_015245	NM_020932	NM_147133	NM_014775	NM_003416	NM_002923	NM_004156	NM_014030
NM_018474	NM_016079	NM_014947	NM_012129	NM_001033523	NM_012334	NM_015185	NM_032016	NM_175040
NM_145258	NM_006464	NM_012081	NM_014838	NM_000235	NM_001032374	NM_006996	NM_002784	NM_000637
NM_017838	NM_012180	NM_012432	NM_017415	NM_003130	NM_017621	NM_003792	NM_021135	NM_021143
NM_198542	NM_005828	NM_020744	NM_022566	NM_033542	NM_007254	NM_130781	NM_199246	NM_001033026
NM_002386	NM_003404	NM_016169	NM_005755	NM_000917	NM_006141	NM_181671	NM_152828	NM_052875
NM_006297	NM_004472	NM_006371	NM_023080	NM_018992	NM_176805	NM_020196	NM_001797	NM_016041
NM_000690	NM_000076	NM_002193	NM_012080	NM_006936	NM_002504	NM_017623	NM_005494	NM_015190
NM_173564	NM_033001	NM_012161	NM_032558	NM_144628	NM_138493	NM_012305	NM_031957	NM_005319
NM_032425	NM_015277	NM_002896	NM_005955	NM_000983	NM_015076	NM_016470	NM_003940	NM_052937
NM_018167	NM_001008938	NM_152913	NM_032196	NM_012080	NM_016069	NM_022485	NM_002785	NM_018310
NM_024507	NM_017926	NM_018199	NM_015305	NM_005311	NM_021734	NM_018378	NM_017443	NM_000455
NM_019116	NM_001418	NM_018267	NM_152522	NM_007319	NM_014301	NM_173511	NM_001826	NM_032478
NM_005919	NM_015094	NM_175918	NM_006717	NM_002203	NM_012140	NM_015380	NM_006311	NM_138802
NM_018971	NM_020898	NM_007029	NM_020528	NM_014901	NM_005290	NM_174855	NM_001008491	NM_130782
NM_001289	NM_198480	NM_145254	NM_018256	NM_001731	NM_007255	NM_001025303	NM_018273	NM_014245
NM_024825	NM_054034	NM_004357	NM_005927	NM_024633	NM_006351	NM_006370	NM_007156	NM_005371
NM_001487	NM_022764	NM_017719	NM_005780	NM_022444	NM_144781	NM_173467	NM_018386	NM_006838
NM_031426	NM_006009	NM_006034	NM_016507	NM_001001661	NM_017615	NM_024671	NM_031314	NM_006886
NM_000309	NM_014647	NM_003589	NM_173179	NM_001024215	NM_017900	NM_173468	NM_001618	NM_024537
NM_031434	NM_033017	NM_024102	NM_014742	NM_152388	NM_001010851	NM_002415	NM_182649	NM_018347
NM_012088	NM_000165	NM_016357	NM_005020	NM_015277	NM_019100	NM_020745	NM_001734	NM_005341
NM_001013635	NM_004768	NM_001257	NM_015411	NM_153374	NM_058183	NM_005185	NM_015493	NM_017908
NM_025150	NM_001921	NM_014098	NM_006196	NM_021975	NM_006301	NM_181715	NM_033551	NM_016099
NM_017721	NM_003130	NM_003374	NM_005839	NM_005937	NM_004045	NM_005452	NM_030881	NM_014867
NM_203456	NM_002948	NM_030796	NM_001030012	NM_013263	NM_147161	NM_014214	NM_001198	NM_032378
NM_080616	NM_181093	NM_001664	NM_004494	NM_025222	NM_021128	NM_033281	NM_134470	NM_203434
NM_017807	NM_004705	NM_004807	NM_000551	NM_004417	NM_024918	NM_145342	NM_001219	NM_173583
NM_004059	NM_017426	NM_183414	NM_003896	NM_015878	NM_016226	NM_174889	NM_152740	NM_144970
NM_013974	NM_007044	NM_006148	NM_053024	NM_018223	NM_024512	NM_004182	NM_014556	NM_001018837
NM_019619	NM_020892	NM_001032363	NM_000347	NM_006355	NM_198542	NM_003249	NM_004218	NM_012162
NM_018093	NM_005540	NM_002264	NM_015079	NM_006307	NM_080677	NM_182492	NM_016462	NM_145183
NM_001073	NM_004749	NM_005730	NM_032998	NM_205843	NM_014303	NM_001024465	NM_018284	NM_033168
NM_004693	NM_001822	NM_006527	NM_014409	NM_022473	NM_004584	NM_000474	NM_001330	NM_032860
NM_173621	NM_001007075	NM_152653	NM_018318	NM_014325	NM_172251	NM_031432	NM_006079	NM_212552
NM_001004310	NM_001025080	NM_020738	NM_021737	NM_018688	NM_005452	NM_032799	NM_014713	NM_001031617
NM_138802	NM_174930	NM_001009551	NM_001964	NM_016507	NM_001001723	NM_000941	NM_199133	NM_024407
NM_173843	NM_152380	NM_004156	NM_014871	NM_139279	NM_198287	NM_172390	NM_032895	NM_001012334
NM_001033046	NM_138609	NM_001033561	NM_153832	NM_002345	NM_199163	NM_006833	NM_003574	NM_016039
NM_017550	NM_001235	NM_032846	NM_005359	NM_019594	NM_004395	NM_212492	NM_005717	NM_014366
NM_013976	NM_002764	NM_025262	NM_018602	NM_020744	NM_022464	NM_173663	NM_020216	NM_080668
NM_152359	NM_006420	NM_003130	NM_012102	NM_005730	NM_031280	NM_194280	NM_003409	NM_032868
NM_006284	NM_024569	NM_138300	NM_024541	NM_207309	NM_001550	NM_000018	NM_015453	NM_152682
NM_181866	NM_016081	NM_016141	NM_004425	NM_005168	NM_001666	NM_025084	NM_004371	NM_016055
NM_052868	NM_005109	NM_130809	NM_003956	NM_002658	NM_203302	NM_207111	NM_015702	NM_020824
NM_007317	NM_023079	NM_016098	NM_021645	NM_005088	NM_003826	NM_005290	NM_003919	NM_012278
NM_032345	NM_001009551	NM_001283	NM_013402	NM_021137	NM_176795	NM_001443	NM_014517	NM_144671
NM_016274	NM_201268	NM_014666	NM_004050	NM_000522	NM_030573	NM_001636	NM_005801	NM_032937
NM_001014763	NM_016545	NM_004653	NM_015622	NM_007073	NM_007211	NM_005234	NM_018064	NM_006072
NM_014249	NM_020300	NM_033285	NM_004454	NM_054034	NM_001009936	NM_012163	NM_030579	NM_005455
NM_016581	NM_024295	NM_006070	NM_015713	NM_016206	NM_134323	NM_006261	NM_002791	NM_016028
NM_024876	NM_018959	NM_020762	NM_004429	NM_020311	NM_006927	NM_139242	NM_007223	NM_032731
NM_017495	NM_003129	NM_003769	NM_001007260	NM_001001974	NM_019101	NM_133367	NM_004396	NM_015965
NM_001002878	NM_032958	NM_032317	NM_177974	NM_020967	NM_016274	NM_016020	NM_006825	NM_004215
NM_207285	NM_014847	NM_030918	NM_002524	NM_002893	NM_002969	NM_032477	NM_000527	NM_006383
NM_020435	NM_006037	NM_001085	NM_013451	NM_152281	NM_002412	NM_053051	NM_002137	NM_015448
NM_014551	NM_017902	NM_004275	NM_005529	NM_014444	NM_000106	NM_003172	NM_014248	NM_152565
NM_014449	NM_018992	NM_007326	NM_181093	NM_033184	NM_004470	NM_004890	NM_020951	NM_016245
NM_174926	NM_003200	NM_006491	NM_080628	NM_006773	NM_003387	NM_001303	NM_005354	NM_025268
NM_015971	NM_016080	NM_001024630	NM_001358	NM_004663	NM_148173	NM_024523	NM_080911	NM_032340
NM_030925	NM_003016	NM_001023566	NM_207403	NM_017810	NM_022455	NM_033411	NM_007021	NM_032344
NM_080744	NM_001011722	NM_022083	NM_001461	NM_023076	NM_000485	NM_017871	NM_014413	NM_018465
NM_001012716	NM_019594	NM_012424	NM_000108	NM_001423	NM_006838	NM_022575	NM_002737	NM_001392
NM_024775	NM_002967	NM_078474	NM_002781	NM_022474	NM_017767	NM_016102	NM_015508	NM_001172
NM_016406	NM_024649	NM_002936	NM_152279	NM_003155	NM_014068	NM_001013690	NM_004454	NM_006567
NM_203434	NM_005937	NM_020300	NM_201442	NM_022459	NM_021940	NM_002455	NM_003118	NM_021971
NM_013349	NM_003597	NM_144607	NM_003406	NM_004379	NM_153477	NM_173542	NM_000100	NM_002553
NM_015545	NM_000551	NM_015225	NM_033055	NM_001010983	NM_181458	NM_003765	NM_025152	NM_005138
NM_032100	NM_000943	NM_172209	NM_022752	NM_003131	NM_016594	NM_030926	NM_001743	NM_003800
NM_004328	NM_005370	NM_145012	NM_030927	NM_005238	NM_032306	NM_003812	NM_005605	NM_014763
NM_003609	NM_004140	NM_001151	NM_001024649	NM_023079	NM_014462	NM_003654	NM_005359	NM_024588
NM_031300	NM_003118	NM_003016	NM_021168	NM_004380	NM_015920	NM_024722	NM_001677	NM_002273
NM_003475	NM_032846	NM_012428	NM_004140	NM_005642	NM_024736	NM_015969	NM_024881	NM_017457
NM_031925	NM_057164	NM_004620	NM_024806	NM_033551	NM_145267	NM_018553	NM_001365	NM_001024211
NM_020458	NM_004342	NM_153703	NM_032569	NM_001418	NM_012313	NM_198058	NM_004862	NM_003172
NM_001983	NM_007192	NM_183359	NM_004577	NM_024334	NM_033082	NM_002208	NM_005531	NM_032847
NM_000107	NM_015331	NM_006791	NM_001365	NM_018706	NM_014867	NM_144636	NM_012137	NM_004669
NM_153702	NM_004862	NM_020925	NM_015135	NM_030793	NM_006903	NM_080677	NM_199462	NM_152832
NM_203370	NM_014575	NM_004804	NM_058243	NM_183422	NM_014675	NM_000971	NM_014860	NM_005773
NM_147173	NM_018660	NM_005311	NM_019594	NM_005359	NM_025219	NM_023009	NM_016061	NM_013330
NM_005001	NM_014970	NM_002293	NM_003884	NM_002444	NM_024710	NM_016186	NM_000681	NM_013434
NM_016535	NM_021999	NM_001330	NM_025230	NM_133376	NM_144489	NM_001032292	NM_000366	NM_024653
NM_030593	NM_004156	NM_138423	NM_003597	NM_001116	NM_002475	NM_001607	NM_033198	NM_004659
NM_144999	NM_000090	NM_006526	NM_001008712	NM_144726	NM_033257	NM_012437	NM_003659	NM_016467
NM_145312	NM_005875	NM_021035	NM_014904	NM_018330	NM_016497	NM_032850	NM_005563	NM_024617
NM_032790	NM_001386	NM_032154	NM_004040	NM_022787	NM_025129	NM_030577	NM_001430	NM_016229
NM_001013836	NM_003165	NM_033644	NM_015533	NM_006621	NM_024531	NM_014279	NM_002896	NM_004045
NM_182614	NM_002823	NM_001002860	NM_015058	NM_152387	NM_152506	NM_033251	NM_004048	NM_138436
NM_032366	NM_018443	NM_015331	NM_000274	NM_015928	NM_025203	NM_003321	NM_005381	NM_031288
NM_017908	NM_153706	NM_032256	NM_032547	NM_003887	NM_017675	NM_012203	NM_002139	NM_002110
NM_001031721	NM_001189	NM_001386	NM_016044	NM_148957	NM_021134	NM_002985	NM_005194	NM_001110
NM_002566	NM_005527	NM_020444	NM_005328	NM_005530	NM_004794	NM_017838	NM_014313	NM_180981
NM_013237	NM_052847	NM_015493	NM_014155	NM_016080	NM_198484	NM_019100	NM_001658	NM_194428
NM_001188	NM_007111	NM_182697	NM_001655	NM_006164	NM_022716	NM_006062	NM_019026	NM_144984
NM_001436	NM_003505	NM_018223	NM_006502	NM_012475	NM_000400	NM_199122	NM_033164	NM_020202
NM_014882	NM_033508	NM_000994	NM_021814	NM_018368	NM_005836	NM_138471	NM_003452	NM_198544
NM_032272	NM_183422	NM_024294	NM_024820	NM_003503	NM_052972	NM_016558	NM_001664	NM_181313
NM_000995	NM_024334	NM_001025356	NM_004274	NM_017450	NM_032682	NM_000313	NM_021737	NM_058192
NM_003078	NM_018199	NM_213589	NM_001025080	NM_014742	NM_031209	NM_145716	NM_006585	NM_000955
NM_033277	NM_182943	NM_032737	NM_016348	NM_005504	NM_024928	NM_001009552	NM_015466	NM_032366
NM_016360	NM_020899	NM_002581	NM_003909	NM_025250	NM_023077	NM_080748	NM_025164	NM_001031738
NM_053004	NM_182557	NM_004450	NM_152544	NM_000368	NM_004720	NM_032319	NM_173354	NM_001031749
NM_022489	NM_080653	NM_006359	NM_021235	NM_001655	NM_014595	NM_016456	NM_022553	NM_001687
NM_175895	NM_024628	NM_014899	NM_001068	NM_139168	NM_015872	NM_014266	NM_001033053	NM_024741
NM_015918	NM_022170	NM_170692	NM_001012511	NM_032547	NM_052867	NM_207346	NM_005984	NM_016011
NM_001005922	NM_001004019	NM_016598	NM_014721	NM_004772	NM_144631	NM_052959	NM_139035	NM_017615
NM_005550	NM_024881	NM_201384	NM_004311	NM_014847	NM_016178	NM_000054	NM_001921	NM_003953
NM_174933	NM_004879	NM_001013676	NM_178014	NM_004050	NM_000288	NM_006860	NM_007085	NM_002490
NM_138783	NM_003168	NM_015443	NM_004463	NM_018184	NM_002235	NM_178831	NM_015634	NM_020378
NM_012191	NM_018100	NM_006348	NM_001005404	NM_001017995	NM_017884	NM_213607	NM_003573	NM_003978
NM_207173	NM_001450	NM_019043	NM_005776	NM_005264	NM_024585	NM_198542	NM_016348	NM_052822
NM_002475	NM_020967	NM_020152	NM_181671	NM_018303	NM_015984	NM_022358	NM_003348	NM_001033002
NM_033057	NM_005642	NM_000449	NM_018124	NM_005614	NM_016245	NM_145695	NM_006724	NM_004773
NM_007211	NM_032102	NM_005841	NM_018979	NM_024165	NM_001023560	NM_207352	NM_006290	NM_016487
NM_178314	NM_017751	NM_012118	NM_012266	NM_012310	NM_004582	NM_001017964	NM_007236	NM_003196
NM_003827	NM_000474	NM_015634	NM_007192	NM_139177	NM_145201	NM_032790	NM_001031699	NM_020424
NM_033452	NM_003846	NM_022730	NM_012247	NM_004342	NM_001002027	NM_020676	NM_001688	NM_012163
NM_024742	NM_014742	NM_152608	NM_014734	NM_024874	NM_173680	NM_004126	NM_017758	NM_172002
NM_006453	NM_207332	NM_005388	NM_006007	NM_005109	NM_012222	NM_183386	NM_006268	NM_030815
NM_002729	NM_015878	NM_000318	NM_003564	NM_133265	NM_004735	NM_022044	NM_006282	NM_006345
NM_153763	NM_014292	NM_199247	NM_024967	NM_013283	NM_024805	NM_001033760	NM_001693	NM_020147
NM_032370	NM_003651	NM_138704	NM_032737	NM_004530	NM_003350	NM_014417	NM_018201	NM_016256
NM_201441	NM_032027	NM_153464	NM_014178	NM_145016	NM_148956	NM_001033002	NM_007008	NM_138797
NM_004493	NM_003250	NM_152871	NM_147188	NM_002948	NM_001745	NM_138499	NM_153719	NM_001012321
NM_181790	NM_004494	NM_006167	NM_201268	NM_030881	NM_152339	NM_001012334	NM_020773	NM_003721
NM_032799	NM_001001561	NM_198402	NM_022465	NM_000671	NM_014362	NM_001251	NM_206892	NM_006680
NM_019100	NM_016441	NM_003873	NM_003407	NM_181427	NM_022742	NM_003196	NM_006904	NM_032109
NM_006351	NM_006825	NM_033406	NM_016472	NM_006022	NM_005675	NM_182498	NM_024092	NM_033646
NM_177405	NM_183001	NM_020066	NM_001659	NM_018685	NM_201398	NM_005034	NM_002070	NM_032213
NM_002689	NM_001024847	NM_005544	NM_015359	NM_007368	NM_001381	NM_181471	NM_004766	NM_174941
NM_181711	NM_001011516	NM_022553	NM_015213	NM_182943	NM_174909	NM_000600	NM_005437	NM_001541
NM_016332	NM_003971	NM_003022	NM_199354	NM_000165	NM_152261	NM_024507	NM_002937	NM_031968
NM_002801	NM_139013	NM_002444	NM_017424	NM_016258	NM_206539	NM_006468	NM_030810	NM_013260
NM_004269	NM_005417	NM_016038	NM_006990	NM_006763	NM_016286	NM_024085	NM_007370	NM_033257
NM_005593	NM_006366	NM_002868	NM_001731	NM_017549	NM_001001410	NM_001018837	NM_014038	NM_024594
NM_022762	NM_199203	NM_003330	NM_015084	NM_005842	NM_006031	NM_022810	NM_031442	NM_024928
NM_004813	NM_012102	NM_004627	NM_003940	NM_014947	NM_138355	NM_144716	NM_017983	NM_024909
NM_006647	NM_001017368	NM_207578	NM_024917	NM_015359	NM_138476	NM_001010980	NM_006649	NM_001014446
NM_198692	NM_213631	NM_018079	NM_003632	NM_001008529	NM_015049	NM_198446	NM_018993	NM_000422
NM_006782	NM_152740	NM_182557	NM_016316	NM_021227	NM_018393	NM_173828	NM_018171	NM_033630
NM_014311	NM_001015053	NM_001008490	NM_201636	NM_022495	NM_198058	NM_006670	NM_005917	NM_005052
NM_152663	NM_033480	NM_006372	NM_001291	NM_030961	NM_203370	NM_138463	NM_003016	NM_032230
NM_001001653	NM_001655	NM_014676	NM_017810	NM_021135	NM_199336	NM_004894	NM_020899	NM_199336
NM_021729	NM_006765	NM_007044	NM_016004	NM_031476	NM_032309	NM_020424	NM_003252	NM_176818
NM_018134	NM_005927	NM_178014	NM_145266	NM_016348	NM_003263	NM_014618	NM_001386	NM_030568
NM_201265	NM_052885	NM_017877	NM_002340	NM_001814	NM_177436	NM_004635	NM_138347	NM_181528
NM_016310	NM_001017922	NM_201268	NM_021058	NM_138402	NM_144736	NM_001003	NM_001920	NM_006860
NM_001447	NM_014947	NM_014412	NM_006052	NM_000234	NM_000139	NM_017721	NM_018955	NM_001545
NM_032819	NM_005373	NM_024843	NM_002869	NM_015481	NM_001008397	NM_080413	NM_006367	NM_007115
NM_000465	NM_001007072	NM_019096	NM_032846	NM_201268	NM_020234	NM_031280	NM_024596	NM_001001653
NM_033557	NM_002781	NM_004674	NM_003131	NM_012250	NM_020158	NM_024718	NM_000895	NM_203416
NM_017874	NM_003584	NM_022131	NM_014382	NM_014755	NM_152407	NM_000576	NM_003174	NM_016492
NM_032319	NM_001005911	NM_007190	NM_024569	NM_001006610	NM_203343	NM_001002844	NM_004832	NM_022914
NM_022165	NM_004034	NM_000276	NM_004472	NM_005450	NM_004328	NM_001033551	NM_000938	NM_000629
NM_021245	NM_012264	NM_015143	NM_003620	NM_016134	NM_144591	NM_004322	NM_003366	NM_004809
NM_001991	NM_005354	NM_001613	NM_007219	NM_003247	NM_005521	NM_006279	NM_020199	NM_003085
NM_000327	NM_001430	NM_019045	NM_001423	NM_198252	NM_014635	NM_213720	NM_001512	NM_004894
NM_033625	NM_004450	NM_014059	NM_007200	NM_178835	NM_033240	NM_019008	NM_002398	NM_173691
NM_000086	NM_183359	NM_014325	NM_000546	NM_020472	NM_006345	NM_020526	NM_002304	NM_032306
NM_145748	NM_017514	NM_000305	NM_001116	NM_032856	NM_201441	NM_007022	NM_003002	NM_017906
NM_000504	NM_018697	NM_019006	NM_019011	NM_148918	NM_018950	NM_000402	NM_018060	NM_172244
NM_213651	NM_000234	NM_205768	NM_001330	NM_001031684	NM_006368	NM_024515	NM_014345	NM_002425
NM_031427	NM_003945	NM_003922	NM_001105	NM_020200	NM_003491	NM_006811	NM_013384	NM_178867
NM_032515	NM_006070	NM_144724	NM_013374	NM_015170	NM_006002	NM_004546	NM_007372	NM_005488
NM_001013621	NM_017758	NM_201274	NM_013399	NM_000262	NM_004292	NM_016494	NM_006519	NM_003096
NM_024579	NM_018948	NM_005109	NM_012317	NM_001013739	NM_001011649	NM_032261	NM_001660	NM_014316
NM_032916	NM_021814	NM_133377	NM_013284	NM_014048	NM_144567	NM_002969	NM_000255	NM_078468
NM_181599	NM_005270	NM_002737	NM_024517	NM_002193	NM_006852	NM_016399	NM_014504	NM_138463
NM_152485	NM_002857	NM_032382	NM_012325	NM_006547	NM_022641	NM_001003714	NM_004147	NM_001029896
NM_012109	NM_052864	NM_080927	NM_017877	NM_003798	NM_032387	NM_024582	NM_004613	NM_178324
NM_199285	NM_007079	NM_004371	NM_001791	NM_001429	NM_020148	NM_016050	NM_001029891	NM_053005
NM_016565	NM_016128	NM_001531	NM_030961	NM_021999	NM_001024938	NM_058187	NM_021159	NM_032319
NM_015654	NM_003922	NM_016952	NM_139279	NM_020772	NM_003923	NM_002856	NM_152653	NM_001014975
NM_017530	NM_004275	NM_203304	NM_080491	NM_012102	NM_153251	NM_004142	NM_003369	NM_016154
NM_058173	NM_004371	NM_001031709	NM_016287	NM_020444	NM_016307	NM_013299	NM_022459	NM_017984
NM_001012980	NM_015509	NM_178542	NM_024779	NM_001013840	NM_005190	NM_152485	NM_003928	NM_017917
NM_031897	NM_004454	NM_018130	NM_152268	NM_015294	NM_005594	NM_000873	NM_014669	NM_006297
NM_173689	NM_002629	NM_170753	NM_025136	NM_152740	NM_016484	NM_207459	NM_001126	NM_032164
NM_007210	NM_014517	NM_005184	NM_004914	NM_015446	NM_000023	NM_005554	NM_004651	NM_024076
NM_019020	NM_001505	NM_017902	NM_002868	NM_003769	NM_016074	NM_017883	NM_032027	NM_001033030
NM_006860	NM_002982	NM_013236	NM_003916	NM_000318	NM_032910	NM_018437	NM_001025356	NM_181513
NM_012079	NM_003110	NM_014864	NM_001694	NM_006182	NM_016426	NM_002626	NM_020414	NM_002977
NM_207368	NM_001029859	NM_005429	NM_005605	NM_006052	NM_005041	NM_003365	NM_006868	NM_032910
NM_199296	NM_015305	NM_080836	NM_006242	NM_000291	NM_201280	NM_000667	NM_018660	NM_032140
NM_207355	NM_005342	NM_003651	NM_003655	NM_207306	NM_023936	NM_003660	NM_020311	NM_152285
NM_032306	NM_003664	NM_152740	NM_007359	NM_178230	NM_014042	NM_153200	NM_080649	NM_181718
NM_007163	NM_013283	NM_003798	NM_000110	NM_016575	NM_022493	NM_003752	NM_000396	NM_002801
NM_024571	NM_002145	NM_003487	NM_002539	NM_003922	NM_174983	NM_022370	NM_006835	NM_000392
NM_022903	NM_006052	NM_017896	NM_001032999	NM_013326	NM_031288	NM_001031665	NM_002970	NM_019100
NM_005005	NM_014556	NM_014892	NM_145715	NM_030758	NM_032124	NM_007011	NM_000599	NM_015120
NM_005452	NM_003655	NM_194331	NM_024726	NM_001924	NM_014285	NM_024097	NM_016454	NM_001239
NM_006555	NM_022756	NM_002086	NM_019109	NM_016090	NM_022110	NM_032484	NM_015535	NM_152499
NM_005273	NM_001002860	NM_024517	NM_032127	NM_032620	NM_024083	NM_001002034	NM_004865	NM_002337
NM_017909	NM_014734	NM_001219	NM_001822	NM_172210	NM_015644	NM_006493	NM_002629	NM_018891
NM_015516	NM_002881	NM_138389	NM_013992	NM_006602	NM_016020	NM_024326	NM_005765	NM_000904
NM_152911	NM_007355	NM_032436	NM_021156	NM_006079	NM_025076	NM_198935	NM_018054	NM_018081
NM_003172	NM_006745	NM_004559	NM_017679	NM_001848	NM_005838	NM_004477	NM_194071	NM_030567
NM_152474	NM_032320	NM_057164	NM_001008736	NM_001009551	NM_005608	NM_000407	NM_001020820	NM_030811
NM_001392	NM_003127	NM_003887	NM_016206	NM_020379	NM_016154	NM_006903	NM_015544	NM_004704
NM_018245	NM_024652	NM_172244	NM_175872	NM_016081	NM_023933	NM_145057	NM_174921	NM_004435
NM_016102	NM_002999	NM_001453	NM_173354	NM_002781	NM_006886	NM_001001555	NM_006054	NM_173546
NM_001013694	NM_002356	NM_001018059	NM_199329	NM_003870	NM_000327	NM_001236	NM_032836	NM_024684
NM_024068	NM_152388	NM_004728	NM_005530	NM_199168	NM_024588	NM_021995	NM_014604	NM_080744
NM_172251	NM_000088	NM_005786	NM_000318	NM_012129	NM_015683	NM_006410	NM_000240	NM_007241
NM_177948	NM_020706	NM_000332	NM_015321	NM_025106	NM_006492	NM_003727	NM_017491	NM_207106
NM_012456	NM_006628	NM_004998	NM_001154	NM_013372	NM_020424	NM_006804	NM_012250	NM_002237
NM_002702	NM_005871	NM_002767	NM_005730	NM_001020820	NM_000124	NM_017585	NM_006667	NM_024650
NM_001005414	NM_001449	NM_139015	NM_001017922	NM_003567	NM_001031827	NM_153246	NM_170679	NM_006024
NM_182679	NM_001029891	NM_025163	NM_024063	NM_006167	NM_031304	NM_032634	NM_001003683	NM_001538
NM_007022	NM_152843	NM_014914	NM_001017995	NM_015331	NM_017566	NM_033212	NM_003605	NM_001033677
NM_025219	NM_004878	NM_145243	NM_015345	NM_014292	NM_004750	NM_017775	NM_001984	NM_173828
NM_020384	NM_022902	NM_194430	NM_015264	NM_013284	NM_153218	NM_173522	NM_138391	NM_006397
NM_015911	NM_031203	NM_032041	NM_004275	NM_002857	NM_002196	NM_207582	NM_002710	NM_017884
NM_018455	NM_001660	NM_004050	NM_018992	NM_004472	NM_022361	NM_012088	NM_005174	NM_005452
NM_153336	NM_004689	NM_012475	NM_145173	NM_017456	NM_018373	NM_174905	NM_001967	NM_019005
NM_032910	NM_002454	NM_017481	NM_014865	NM_005135	NM_153695	NM_153757	NM_006826	NM_144987
NM_173831	NM_006601	NM_022170	NM_003400	NM_030954	NM_138802	NM_015853	NM_016627	NM_080757
NM_018663	NM_017733	NM_001006610	NM_005204	NM_032139	NM_002943	NM_024531	NM_004409	NM_138476
NM_033504	NM_018354	NM_005339	NM_001025234	NM_015252	NM_014346	NM_152832	NM_005842	NM_198275
NM_030662	NM_001402	NM_001031835	NM_031922	NM_005348	NM_145271	NM_201265	NM_006195	NM_025076
NM_006120	NM_145012	NM_032027	NM_018223	NM_007111	NM_003548	NM_001954	NM_006148	NM_024099
NM_002428	NM_001023587	NM_213662	NM_001681	NM_005381	NM_024042	NM_001009932	NM_024700	NM_032850
NM_003021	NM_021222	NM_014515	NM_139035	NM_000945	NM_016246	NM_024741	NM_003217	NM_019116
NM_013379	NM_178542	NM_007026	NM_019013	NM_001995	NM_013321	NM_002127	NM_006373	NM_006505
NM_003973	NM_016272	NM_016395	NM_001642	NM_005400	NM_001008661	NM_002676	NM_004781	NM_012088
NM_019596	NM_001065	NM_020807	NM_001013676	NM_014657	NM_024099	NM_002413	NM_032020	NM_001033562
NM_032378	NM_019011	NM_003017	NM_014951	NM_006070	NM_015932	NM_015259	NM_030674	NM_006351
NM_152264	NM_001032999	NM_182507	NM_053001	NM_025152	NM_002208	NM_052815	NM_001280	NM_024326
NM_153709	NM_015939	NM_152903	NM_005692	NM_198400	NM_016183	NM_174926	NM_014765	NM_031459
NM_024078	NM_015425	NM_005637	NM_021035	NM_017902	NM_002998	NM_015982	NM_007178	NM_015054
NM_003511	NM_152772	NM_139313	NM_016057	NM_014556	NM_213607	NM_020996	NM_148976	NM_024632
NM_021077	NM_000393	NM_014691	NM_005178	NM_014252	NM_002461	NM_138737	NM_005327	NM_007278
NM_033421	NM_018386	NM_199461	NM_005863	NM_001014283	NM_001033024	NM_206837	NM_182916	NM_031464
NM_002181	NM_001658	NM_021947	NM_001020820	NM_002823	NM_144970	NM_006204	NM_004554	NM_182536
NM_002503	NM_199205	NM_003564	NM_014325	NM_032284	NM_144716	NM_176805	NM_025263	NM_014169
NM_030974	NM_022473	NM_144578	NM_012199	NM_018078	NM_004424	NM_004120	NM_016470	NM_003491
NM_001004734	NM_003074	NM_144703	NM_006936	NM_003068	NM_194249	NM_006214	NM_006570	NM_006556
NM_198954	NM_007285	NM_024087	NM_020746	NM_014071	NM_020847	NM_006876	NM_014426	NM_017702
NM_138485	NM_030650	NM_033551	NM_006238	NM_005674	NM_014167	NM_001545	NM_013373	NM_012225
NM_025248	NM_000937	NM_006925	NM_080841	NM_004156	NM_017530	NM_004094	NM_025126	NM_012290
NM_017425	NM_005184	NM_080911	NM_001015053	NM_004811	NM_025212	NM_138375	NM_181555	NM_020123
NM_025076	NM_021991	NM_030930	NM_015878	NM_002160	NM_002528	NM_024082	NM_007208	NM_173170
NM_138435	NM_013313	NM_006936	NM_001237	NM_002959	NM_058190	NM_002484	NM_153322	NM_138801
NM_006451	NM_032012	NM_024071	NM_183075	NM_003998	NM_138467	NM_152274	NM_019007	NM_198075
NM_016606	NM_005088	NM_012325	NM_138381	NM_001154	NM_139247	NM_002448	NM_031904	NM_000232
NM_021158	NM_001032288	NM_198902	NM_153358	NM_003374	NM_033117	NM_032478	NM_018689	NM_032793
NM_178342	NM_173562	NM_005875	NM_020211	NM_015832	NM_002144	NM_001024844	NM_016013	NM_024805
NM_004898	NM_001105	NM_001860	NM_005957	NM_002982	NM_138463	NM_000512	NM_004216	NM_002196
NM_024326	NM_033375	NM_004641	NM_022074	NM_018367	NM_002618	NM_004761	NM_033657	NM_023933
NM_014169	NM_001839	NM_020382	NM_198401	NM_006601	NM_001003682	NM_031300	NM_005229	NM_015678
NM_001010980	NM_023015	NM_014409	NM_152390	NM_017724	NM_145913	NM_000201	NM_004419	NM_174896
NM_016573	NM_022818	NM_030629	NM_030758	NM_170587	NM_199342	NM_058181	NM_138809	NM_181466
NM_019118	NM_144628	NM_002398	NM_024165	NM_015206	NM_017457	NM_013349	NM_138774	NM_005837
NM_018122	NM_006855	NM_001300	NM_006079	NM_001949	NM_006713	NM_006927	NM_003744	NM_005872
NM_017566	NM_175709	NM_199181	NM_033375	NM_000484	NM_018188	NM_203290	NM_000075	NM_017882
NM_004159	NM_003745	NM_001154	NM_014345	NM_178508	NM_002276	NM_004502	NM_002633	NM_014209
NM_144653	NM_002896	NM_001642	NM_007047	NM_004420	NM_014753	NM_001031722	NM_002742	NM_152379
NM_018116	NM_014671	NM_002948	NM_015506	NM_005207	NM_032479	NM_001002876	NM_004872	NM_014167
NM_032885	NM_144692	NM_004425	NM_017933	NM_002501	NM_173804	NM_012486	NM_207376	NM_018438
NM_000156	NM_152716	NM_152437	NM_001003396	NM_199423	NM_004030	NM_015971	NM_037370	NM_202001
NM_001805	NM_152270	NM_017813	NM_022138	NM_001850	NM_015012	NM_013388	NM_001665	NM_032683
NM_001003684	NM_014515	NM_006196	NM_032832	NM_017443	NM_012163	NM_003124	NM_025234	NM_005805
NM_006012	NM_005207	NM_032740	NM_018490	NM_014647	NM_001085	NM_018384	NM_080592	NM_031452
NM_003510	NM_000362	NM_194359	NM_024771	NM_001797	NM_031482	NM_001005376	NM_024793	NM_001002756
NM_014780	NM_016333	NM_152531	NM_005406	NM_006472	NM_017722	NM_001983	NM_006084	NM_016581
NM_017665	NM_001999	NM_015397	NM_015060	NM_002737	NM_199328	NM_145812	NM_001005861	NM_201398
NM_012473	NM_018223	NM_014488	NM_001002257	NM_001010990	NM_003609	NM_024496	NM_015960	NM_001011699
NM_199341	NM_144607	NM_133502	NM_007223	NM_001008844	NM_044472	NM_002513	NM_004308	NM_015360
NM_030577	NM_205548	NM_000235	NM_004878	NM_019040	NM_032731	NM_033421	NM_181873	NM_021732
NM_016930	NM_147133	NM_032199	NM_001013840	NM_018693	NM_018418	NM_007233	NM_000019	NM_003135
NM_024537	NM_005880	NM_003945	NM_012434	NM_020300	NM_002270	NM_145912	NM_018141	NM_172251
NM_006645	NM_001280	NM_014604	NM_014741	NM_022452	NM_016391	NM_024014	NM_015041	NM_181619
NM_183041	NM_139125	NM_022899	NM_080607	NM_001126	NM_033246	NM_003475	NM_005997	NM_001010865
NM_172341	NM_015711	NM_015477	NM_000917	NM_032307	NM_021971	NM_004146	NM_006283	NM_138493
NM_000054	NM_033542	NM_018108	NM_003567	NM_000255	NM_005127	NM_172251	NM_024586	NM_025220
NM_002664	NM_001908	NM_005605	NM_152362	NM_007355	NM_005125	NM_016406	NM_004805	NM_017777
NM_017916	NM_031904	NM_000546	NM_024339	NM_005188	NM_212492	NM_017636	NM_003345	NM_012476
NM_003399	NM_018479	NM_003670	NM_021227	NM_030767	NM_016096	NM_130802	NM_003011	NM_016369
NM_015873	NM_005458	NM_014671	NM_018983	NM_003016	NM_024326	NM_018116	NM_016598	NM_005852
NM_022719	NM_017998	NM_002568	NM_007355	NM_005927	NM_006334	NM_017607	NM_000937	NM_206808
NM_014430	NM_138608	NM_032364	NM_174911	NM_015001	NM_005341	NM_025194	NM_003462	NM_014595
NM_017410	NM_006034	NM_004733	NM_002083	NM_003748	NM_024632	NM_033057	NM_145918	NM_002947
NM_018146	NM_014583	NM_138958	NM_019043	NM_020357	NM_020897	NM_006022	NM_018047	NM_021173
NM_018344	NM_001003810	NM_021814	NM_005370	NM_015002	NM_000790	NM_001031721	NM_006431	NM_000229
NM_152943	NM_015338	NM_002037	NM_013384	NM_031442	NM_020230	NM_006072	NM_145693	NM_012460
NM_138717	NM_000848	NM_002734	NM_173795	NM_032737	NM_001024212	NM_014311	NM_001554	NM_001607
NM_032111	NM_005678	NM_147133	NM_203351	NM_001921	NM_032494	NM_003468	NM_004965	NM_001003795
NM_178587	NM_000318	NM_017548	NM_145049	NM_016830	NM_207334	NM_182565	NM_024926	NM_014463
NM_005468	NM_012210	NM_001013005	NM_002948	NM_003584	NM_016541	NM_021244	NM_001005849	NM_001007157
NM_000017	NM_001018059	NM_014600	NM_012091	NM_000474	NM_203418	NM_199184	NM_024039	NM_002981
NM_177987	NM_004718	NM_002582	NM_020300	NM_001005386	NM_152649	NM_000504	NM_005653	NM_016286
NM_206837	NM_006292	NM_001030007	NM_006296	NM_032638	NM_138436	NM_022361	NM_003418	NM_138421
NM_001541	NM_015194	NM_015602	NM_033551	NM_002514	NM_018163	NM_006509	NM_001122	NM_018163
NM_080548	NM_030767	NM_000484	NM_005311	NM_002546	NM_006556	NM_031472	NM_001009924	NM_207442
NM_198042	NM_001797	NM_138770	NM_030813	NM_017733	NM_018245	NM_032515	NM_007264	NM_020188
NM_003946	NM_024874	NM_018103	NM_001848	NM_014970	NM_138421	NM_153603	NM_004512	NM_178310
NM_177542	NM_005401	NM_173653	NM_020422	NM_182916	NM_022146	NM_001426	NM_016542	NM_022163
NM_181464	NM_015002	NM_016142	NM_207306	NM_057164	NM_024407	NM_006349	NM_198058	NM_022071
NM_032344	NM_006312	NM_181308	NM_002755	NM_003168	NM_032744	NM_019037	NM_032534	NM_080677
NM_001004323	NM_004530	NM_014413	NM_175895	NM_004034	NM_002947	NM_172112	NM_024060	NM_032928
NM_007135	NM_032985	NM_054014	NM_138376	NM_002784	NM_053000	NM_007254	NM_001323	NM_002475
NM_145061	NM_021154	NM_001013398	NM_173824	NM_018571	NM_183241	NM_006598	NM_017641	NM_007317
NM_003325	NM_199334	NM_024627	NM_001949	NM_016079	NM_033211	NM_021640	NM_178354	NM_004317
NM_020680	NM_006570	NM_145808	NM_016040	NM_001365	NM_014371	NM_147173	NM_031468	NM_014362
NM_021134	NM_037370	NM_024095	NM_001418	NM_004879	NM_002257	NM_201398	NM_022142	NM_178174
NM_176792	NM_001996	NM_199462	NM_199511	NM_002785	NM_016311	NM_175620	NM_006898	NM_004094
NM_024736	NM_007045	NM_152713	NM_018697	NM_022770	NM_032166	NM_207034	NM_003072	NM_001015508
NM_014737	NM_012137	NM_005828	NM_022059	NM_006291	NM_144698	NM_017916	NM_018467	NM_006335
NM_006816	NM_025222	NM_012210	NM_003769	NM_001017974	NM_001348	NM_001522	NM_173502	NM_004477
NM_007083	NM_022553	NM_014629	NM_003035	NM_003663	NM_207478	NM_001008696	NM_145030	NM_032479
NM_021794	NM_000681	NM_003194	NM_147156	NM_017626	NM_000629	NM_016569	NM_015898	NM_175066
NM_017647	NM_002827	NM_005038	NM_023931	NM_001620	NM_052873	NM_001008220	NM_001687	NM_006713
NM_201398	NM_002893	NM_006595	NM_001661	NM_171846	NM_019048	NM_153211	NM_002504	NM_181509
NM_145696	NM_004559	NM_005589	NM_003766	NM_001964	NM_012459	NM_000327	NM_002812	NM_031280
NM_207329	NM_033238	NM_000202	NM_015832	NM_017851	NM_001008237	NM_003059	NM_012181	NM_024097
NM_007123	NM_030809	NM_016258	NM_004718	NM_031904	NM_153333	NM_012227	NM_006871	NM_152911
NM_013360	NM_007259	NM_020245	NM_000165	NM_015305	NM_024589	NM_021138	NM_004507	NM_014186
NM_006871	NM_013384	NM_001010924	NM_001031706	NM_133636	NM_032137	NM_182614	NM_053004	NM_031309
NM_001001555	NM_153719	NM_003045	NM_020319	NM_006009	NM_138703	NM_198559	NM_024681	NM_018093
NM_025268	NM_004866	NM_001012456	NM_001098	NM_207113	NM_020328	NM_033557	NM_178429	NM_152416
NM_032527	NM_004227	NM_152270	NM_006241	NM_012264	NM_001003795	NM_199173	NM_003691	NM_016275
NM_022727	NM_014071	NM_201554	NM_006773	NM_016410	NM_003760	NM_001013672	NM_052873	NM_000294
NM_024815	NM_005022	NM_018144	NM_021965	NM_032027	NM_033666	NM_001006606	NM_004564	NM_017530
NM_014067	NM_015702	NM_032142	NM_020744	NM_001002860	NM_033416	NM_152383	NM_014614	NM_017566
NM_001976	NM_031215	NM_153322	NM_002271	NM_014344	NM_001236	NM_002804	NM_001005498	NM_198439
NM_180981	NM_001618	NM_003258	NM_018937	NM_152713	NM_016399	NM_198828	NM_004092	NM_017823
NM_206902	NM_152653	NM_002306	NM_001198	NM_001030050	NM_020548	NM_033027	NM_017615	NM_032515
NM_001003678	NM_003998	NM_003557	NM_003664	NM_001449	NM_002038	NM_052988	NM_006694	NM_033297
NM_001029964	NM_001791	NM_004862	NM_001326	NM_207293	NM_004669	NM_033630	NM_015103	NM_152398
NM_015399	NM_002609	NM_172169	NM_033184	NM_005605	NM_202001	NM_173457	NM_007160	NM_207368
NM_002005	NM_153322	NM_021999	NM_152306	NM_012137	NM_014480	NM_033340	NM_006349	NM_000259
NM_002905	NM_014550	NM_014742	NM_182943	NM_004689	NM_001003686	NM_014508	NM_001001716	NM_001005376
NM_004435	NM_012110	NM_018975	NM_152553	NM_173562	NM_003475	NM_181509	NM_017841	NM_181530
NM_030578	NM_025106	NM_015878	NM_003001	NM_031215	NM_053004	NM_007213	NM_019056	NM_001014797
NM_015925	NM_006282	NM_017994	NM_005902	NM_012413	NM_198954	NM_015864	NM_024507	NM_138559
NM_001033024	NM_002067	NM_018303	NM_006464	NM_015963	NM_001953	NM_004214	NM_053050	NM_000485
NM_022372	NM_001664	NM_014223	NM_012141	NM_020951	NM_012323	NM_032345	NM_017636	NM_013321
NM_006278	NM_174902	NM_153361	NM_176814	NM_014691	NM_018135	NM_032744	NM_032178	NM_016535
NM_003752	NM_004463	NM_022450	NM_033285	NM_031203	NM_173564	NM_183233	NM_032125	NM_024742
NM_181536	NM_018477	NM_005345	NM_004450	NM_003651	NM_003946	NM_022719	NM_005987	NM_144999
NM_178460	NM_018453	NM_001707	NM_201384	NM_005429	NM_170672	NM_152495	NM_015201	NM_002178
NM_153187	NM_032737	NM_018477	NM_006621	NM_015060	NM_006396	NM_183241	NM_198271	NM_003627
NM_031454	NM_006618	NM_018095	NM_020440	NM_004787	NM_032527	NM_007284	NM_020381	NM_032472
NM_000485	NM_001693	NM_003958	NM_031989	NM_017990	NM_016215	NM_032222	NM_001024924	NM_174926
NM_024029	NM_019009	NM_020713	NM_053067	NM_006242	NM_006234	NM_016581	NM_022895	NM_013285
NM_001032292	NM_000089	NM_013995	NM_017769	NM_004140	NM_006897	NM_020402	NM_020949	NM_006332
NM_198533	NM_015282	NM_012197	NM_003945	NM_031431	NM_003100	NM_018134	NM_001006937	NM_001007090
NM_000446	NM_152828	NM_016076	NM_213568	NM_002648	NM_152365	NM_032747	NM_018677	NM_173859
NM_006927	NM_017491	NM_153182	NM_013444	NM_145266	NM_015458	NM_005125	NM_003377	NM_013367
NM_152499	NM_005194	NM_003971	NM_152999	NM_021737	NM_001792	NM_175040	NM_012079	NM_144781
NM_176818	NM_004431	NM_012413	NM_001002	NM_138571	NM_181351	NM_003399	NM_201535	NM_174905
NM_002809	NM_139015	NM_007073	NM_012264	NM_001690	NM_012276	NM_174893	NM_000191	NM_014739
NM_001001723	NM_000449	NM_023079	NM_014949	NM_030674	NM_032937	NM_018112	NM_015503	NM_019037
NM_016069	NM_001488	NM_144628	NM_020127	NM_004371	NM_014886	NM_006297	NM_006284	NM_003044
NM_003813	NM_018571	NM_182972	NM_015294	NM_013411	NM_019104	NM_182905	NM_015644	NM_152331
NM_021625	NM_006348	NM_005667	NM_033083	NM_031989	NM_199298	NM_005005	NM_006000	NM_004556
NM_015845	NM_001017430	NM_001025080	NM_002783	NM_001010866	NM_201526	NM_014623	NM_199512	NM_024120
NM_199073	NM_003901	NM_002145	NM_013403	NM_001421	NM_014412	NM_001030287	NM_016068	NM_053050
NM_181334	NM_001219	NM_002539	NM_024700	NM_022079	NM_007317	NM_173572	NM_014253	NM_174983
NM_080732	NM_052966	NM_001004019	NM_017582	NM_019091	NM_033428	NM_001001975	NM_152411	NM_018956
NM_173583	NM_024766	NM_207118	NM_002705	NM_175709	NM_012342	NM_013974	NM_020996	NM_003475
NM_182924	NM_016320	NM_000190	NM_007186	NM_003144	NM_212552	NM_144999	NM_007276	NM_006412
NM_033630	NM_006835	NM_145295	NM_178025	NM_172208	NM_002004	NM_145748	NM_198536	NM_001031848
NM_004527	NM_001008745	NM_031302	NM_004342	NM_004168	NM_001017971	NM_017530	NM_001001555	NM_144716
NM_001246	NM_058182	NM_004417	NM_002501	NM_016133	NM_138362	NM_001031703	NM_024083	NM_017854
NM_020996	NM_007313	NM_002070	NM_005871	NM_001259	NM_004094	NM_032301	NM_144489	NM_006837
NM_176805	NM_014382	NM_020162	NM_030930	NM_006765	NM_032593	NM_004995	NM_007166	NM_053286
NM_079420	NM_003559	NM_022059	NM_012210	NM_145263	NM_001288	NM_015570	NM_002337	NM_015683
NM_080659	NM_030789	NM_022121	NM_004227	NM_002540	NM_002718	NM_138733	NM_201650	NM_020189
NM_030567	NM_032127	NM_002881	NM_018025	NM_020127	NM_003080	NM_006026	NM_004546	NM_003731
NM_024585	NM_021035	NM_199053	NM_007361	NM_139013	NM_001093	NM_005583	NM_021078	NM_001460
NM_022802	NM_002582	NM_017456	NM_020755	NM_001684	NM_019070	NM_005138	NM_006410	NM_001009936
NM_006902	NM_017772	NM_004431	NM_006403	NM_031407	NM_007013	NM_032310	NM_145201	NM_001003686
NM_000782	NM_153260	NM_004879	NM_173079	NM_001386	NM_020188	NM_017803	NM_001031742	NM_003350
NM_032789	NM_020744	NM_153374	NM_133503	NM_014602	NM_032343	NM_138476	NM_003172	NM_145280
NM_032164	NM_004566	NM_020706	NM_001620	NM_020338	NM_031207	NM_022061	NM_182491	NM_015942
NM_024591	NM_012091	NM_002826	NM_001421	NM_003956	NM_001564	NM_004148	NM_015703	NM_005855
NM_017702	NM_002137	NM_005678	NM_002936	NM_005880	NM_001824	NM_024664	NM_018320	NM_024101
NM_052892	NM_005476	NM_001031746	NM_021646	NM_022734	NM_213605	NM_003691	NM_001571	NM_020386
NM_181719	NM_020338	NM_001418	NM_001921	NM_006855	NM_021805	NM_002167	NM_016310	NM_000913
NM_003721	NM_004674	NM_005614	NM_016022	NM_033634	NM_000500	NM_012191	NM_145039	NM_033363
NM_006305	NM_182649	NM_006730	NM_020354	NM_021242	NM_144653	NM_203474	NM_173663	NM_016466
NM_153823	NM_007049	NM_014686	NM_018231	NM_004892	NM_014878	NM_152559	NM_198839	NM_206831
NM_207448	NM_030810	NM_015599	NM_021204	NM_004450	NM_130773	NM_057092	NM_016531	NM_001348
NM_018052	NM_004396	NM_000320	NM_001008938	NM_005875	NM_153437	NM_015364	NM_014049	NM_003952
NM_138471	NM_002540	NM_016205	NM_003374	NM_007219	NM_052850	NM_031434	NM_004328	NM_032359
NM_014698	NM_173540	NM_014583	NM_015444	NM_020839	NM_004556	NM_172250	NM_001487	NM_002453
NM_019037	NM_022121	NM_031203	NM_015170	NM_194071	NM_020189	NM_014291	NM_022372	NM_173467
NM_139021	NM_005471	NM_152882	NM_006855	NM_006990	NM_207170	NM_021732	NM_006804	NM_176805
NM_004503	NM_024322	NM_014183	NM_024334	NM_005933	NM_023011	NM_024297	NM_000284	NM_199073
NM_024515	NM_023018	NM_016447	NM_012156	NM_004897	NM_014169	NM_015696	NM_138769	NM_181493
NM_000990	NM_000876	NM_017491	NM_001029891	NM_003655	NM_194326	NM_006004	NM_213720	NM_000309
NM_005922	NM_006145	NM_000946	NM_006877	NM_178862	NM_022727	NM_032518	NM_014042	NM_003313
NM_012240	NM_178014	NM_001733	NM_003584	NM_002936	NM_018687	NM_001827	NM_014018	NM_006575
NM_003862	NM_015409	NM_018386	NM_183422	NM_007359	NM_001012626	NM_005276	NM_001004331	NM_015920
NM_177925	NM_000100	NM_001921	NM_003901	NM_007080	NM_022308	NM_016246	NM_201286	NM_016209
NM_006152	NM_014248	NM_013363	NM_018835	NM_003110	NM_032886	NM_004853	NM_014453	NM_198943
NM_021082	NM_016085	NM_001008696	NM_006660	NM_015493	NM_018956	NM_001400	NM_145294	NM_016050
NM_001007792	NM_198902	NM_212460	NM_016151	NM_138376	NM_005013	NM_138401	NM_007155	NM_033129
NM_025232	NM_003605	NM_001417	NM_005159	NM_017758	NM_178233	NM_001720	NM_015965	NM_016069
NM_021805	NM_005606	NM_023019	NM_002785	NM_033238	NM_016504	NM_024632	NM_182580	NM_032520
NM_004173	NM_012405	NM_017953	NM_015575	NM_022121	NM_152307	NM_031477	NM_052888	NM_198330
NM_002361	NM_144578	NM_001007260	NM_001004343	NM_004275	NM_173695	NM_014047	NM_006929	NM_022128
NM_001006666	NM_018689	NM_017747	NM_138619	NM_005494	NM_014060	NM_207368	NM_014186	NM_182640
NM_058197	NM_021809	NM_022473	NM_001010891	NM_013384	NM_012458	NM_145296	NM_014763	NM_153709
NM_052859	NM_004181	NM_000019	NM_138778	NM_002999	NM_145162	NM_001009936	NM_018380	NM_015681
NM_023007	NM_173455	NM_001798	NM_020898	NM_000416	NM_017422	NM_005123	NM_001001502	NM_001030018
NM_014291	NM_005920	NM_171846	NM_015938	NM_005194	NM_002253	NM_015993	NM_013361	NM_014060
NM_005533	NM_002633	NM_033375	NM_000365	NM_001450	NM_133450	NM_016426	NM_144679	NM_002861
NM_183008	NM_005576	NM_004736	NM_002881	NM_000393	NM_178174	NM_178526	NM_001556	NM_004126
NM_021874	NM_002568	NM_152221	NM_006730	NM_024567	NM_173691	NM_001007074	NM_207285	NM_016533
NM_001005498	NM_020773	NM_024089	NM_016080	NM_005471	NM_001024675	NM_001003679	NM_005004	NM_032790
NM_020378	NM_002936	NM_181349	NM_006554	NM_018304	NM_181503	NM_001001795	NM_032816	NM_199342
NM_153437	NM_016475	NM_016138	NM_020463	NM_016569	NM_138940	NM_015324	NM_016096	NM_182523
NM_004003	NM_023080	NM_012180	NM_005109	NM_012180	NM_004874	NM_015621	NM_018488	NM_006404
NM_016466	NM_001743	NM_032569	NM_022495	NM_024700	NM_001011878	NM_002801	NM_080748	NM_144998
NM_173467	NM_006565	NM_014636	NM_001693	NM_000449	NM_001441	NM_005001	NM_004672	NM_000781
NM_005031	NM_012317	NM_198252	NM_020357	NM_001159	NM_018467	NM_003955	NM_005675	NM_024827
NM_006579	NM_021218	NM_006029	NM_018984	NM_014846	NM_207106	NM_004381	NM_012104	NM_130767
NM_032705	NM_020226	NM_000945	NM_017481	NM_001430	NM_018494	NM_001017403	NM_001002027	NM_153339
NM_139248	NM_130468	NM_014504	NM_013326	NM_022818	NM_000198	NM_206922	NM_003444	NM_032309
NM_003491	NM_002070	NM_014138	NM_052965	NM_004896	NM_033031	NM_006378	NM_000998	NM_198954
NM_007213	NM_080841	NM_002166	NM_054014	NM_004494	NM_201553	NM_000154	NM_003548	NM_016406
NM_014046	NM_152493	NM_006036	NM_002456	NM_025164	NM_181843	NM_025045	NM_018649	NM_004839
NM_001024212	NM_015634	NM_138565	NM_001456	NM_003766	NM_174961	NM_016208	NM_004829	NM_139049
NM_025231	NM_016025	NM_019590	NM_003380	NM_000362	NM_024120	NM_024120	NM_001632	NM_177542
NM_018467	NM_007359	NM_000322	NM_006999	NM_001839	NM_178539	NM_020458	NM_172089	NM_030577
NM_000540	NM_005434	NM_022763	NM_020342	NM_017491	NM_152367	NM_002798	NM_020677	NM_001005480
NM_181788	NM_001031679	NM_005839	NM_053275	NM_001521	NM_001033580	NM_004278	NM_006053	NM_032656
NM_032937	NM_018054	NM_007085	NM_001543	NM_007285	NM_015412	NM_000747	NM_001004345	NM_020680
NM_033240	NM_153464	NM_003075	NM_005207	NM_001002292	NM_004477	NM_004809	NM_005804	NM_030934
NM_024539	NM_003870	NM_006988	NM_016238	NM_004598	NM_182627	NM_177925	NM_015636	NM_001032385
NM_174923	NM_002784	NM_004794	NM_014847	NM_012210	NM_138775	NM_182620	NM_138408	NM_181503
NM_198903	NM_016462	NM_000430	NM_139034	NM_006039	NM_014255	NM_001002836	NM_024316	NM_006002
NM_016183	NM_014913	NM_014755	NM_015472	NM_001031699	NM_002421	NM_015956	NM_000904	NM_021096
NM_001009941	NM_177538	NM_006570	NM_020226	NM_133477	NM_004870	NM_213605	NM_001013626	NM_018032
NM_199206	NM_001690	NM_001007	NM_032116	NM_014876	NM_022771	NM_175908	NM_005125	NM_030578
NM_001030018	NM_004897	NM_001400	NM_014065	NM_004862	NM_021077	NM_001031742	NM_004214	NM_025261
NM_152266	NM_022730	NM_017943	NM_016525	NM_004385	NM_031903	NM_024830	NM_213636	NM_013342
NM_004895	NM_032620	NM_013390	NM_004034	NM_018064	NM_016052	NM_145030	NM_012282	NM_052844
NM_153216	NM_001005333	NM_018200	NM_017549	NM_001658	NM_004317	NM_024560	NM_152359	NM_000675
NM_032683	NM_006827	NM_012233	NM_152495	NM_012393	NM_021632	NM_003248	NM_000288	NM_033117
NM_016286	NM_003564	NM_006182	NM_015711	NM_018453	NM_001031686	NM_001919	NM_007254	NM_005694
NM_005879	NM_002340	NM_016433	NM_018259	NM_005765	NM_004427	NM_032340	NM_022128	NM_019101
NM_004260	NM_007200	NM_001791	NM_003206	NM_025137	NM_001175	NM_004548	NM_000245	NM_021138
NM_002723	NM_016057	NM_003766	NM_020347	NM_174902	NM_024316	NM_015160	NM_020861	NM_152486
NM_173170	NM_002473	NM_003688	NM_170746	NM_003559	NM_024514	NM_016310	NM_016497	NM_016049
NM_003224	NM_148923	NM_006409	NM_001008745	NM_018206	NM_001013251	NM_198398	NM_021143	NM_002220
NM_000674	NM_173503	NM_014313	NM_002576	NM_013444	NM_012231	NM_058190	NM_013246	NM_024643
NM_001024074	NM_018222	NM_015329	NM_007270	NM_014294	NM_013305	NM_016332	NM_016360	NM_005318
NM_024026	NM_006602	NM_002340	NM_032102	NM_007085	NM_024775	NM_001024211	NM_024496	NM_138574
NM_021184	NM_013444	NM_003998	NM_032988	NM_001025231	NM_152455	NM_020961	NM_001436	NM_178181
NM_001001657	NM_016038	NM_021737	NM_022452	NM_002356	NM_199171	NM_015953	NM_018438	NM_080626
NM_138632	NM_003928	NM_000165	NM_004371	NM_006825	NM_004073	NM_001487	NM_025215	NM_013976
NM_003549	NM_003487	NM_020190	NM_003076	NM_024063	NM_001002913	NM_144649	NM_002805	NM_032601
NM_005138	NM_019007	NM_152305	NM_001614	NM_153719	NM_001001683	NM_153835	NM_173659	NM_024579
NM_013321	NM_018064	NM_022837	NM_138335	NM_178818	NM_001017921	NM_181464	NM_018478	NM_001568
NM_053050	NM_006148	NM_017918	NM_030967	NM_012242	NM_001007231	NM_007056	NM_005919	NM_138393
NM_005693	NM_006317	NM_018206	NM_002857	NM_080491	NM_001478	NM_173060	NM_030786	NM_001487
NM_018074	NM_007008	NM_015124	NM_001814	NM_001005340	NM_007241	NM_006012	NM_003162	NM_005950
NM_182528	NM_016283	NM_018124	NM_003846	NM_002726	NM_020123	NM_153690	NM_153047	NM_001008949
NM_032593	NM_017443	NM_203416	NM_001009894	NM_020362	NM_016252	NM_003004	NM_031452	NM_002130
NM_002277	NM_015359	NM_006745	NM_012384	NM_001098	NM_005131	NM_032430	NM_007082	NM_022453
NM_212492	NM_018045	NM_181894	NM_003651	NM_152558	NM_058181	NM_031232	NM_001013659	NM_080920
NM_015417	NM_017740	NM_001033505	NM_170692	NM_006353	NM_182905	NM_173859	NM_030783	NM_016426
NM_004455	NM_020362	NM_019011	NM_198682	NM_002890	NM_182640	NM_024637	NM_006886	NM_148956
NM_203376	NM_004943	NM_005863	NM_198700	NM_004768	NM_203288	NM_024327	NM_182907	NM_002876
NM_005101	NM_022734	NM_017958	NM_004530	NM_003118	NM_005811	NM_014726	NM_020912	NM_004328
NM_013437	NM_006135	NM_006452	NM_018660	NM_005370	NM_025097	NM_198954	NM_031454	NM_203288
NM_001001656	NM_016596	NM_015194	NM_015426	NM_014007	NM_004466	NM_003501	NM_003703	NM_138798
NM_015488	NM_014713	NM_002755	NM_006825	NM_006282	NM_206866	NM_012248	NM_144654	NM_004085
NM_002528	NM_152640	NM_002087	NM_152399	NM_001693	NM_207419	NM_005468	NM_033416	NM_006308
NM_015045	NM_198682	NM_001423	NM_021188	NM_007008	NM_003978	NM_001013625	NM_025204	NM_001001410
NM_005483	NM_020200	NM_003369	NM_005596	NM_001527	NM_005052	NM_000995	NM_006623	NM_030771
NM_207507	NM_006643	NM_003246	NM_017491	NM_052965	NM_004545	NM_021972	NM_018639	NM_001005178
NM_032430	NM_000366	NM_024907	NM_001360	NM_006835	NM_021708	NM_001015072	NM_172027	NM_014288
NM_002477	NM_006711	NM_015544	NM_015493	NM_003348	NM_016095	NM_005211	NM_017823	NM_018950
NM_001008571	NM_014977	NM_018129	NM_000366	NM_054014	NM_019118	NM_153187	NM_000682	NM_005101
NM_024316	NM_005605	NM_018837	NM_002703	NM_014933	NM_032332	NM_024029	NM_207442	NM_025098
NM_020979	NM_006054	NM_153715	NM_138794	NM_020182	NM_198330	NM_003485	NM_152286	NM_002534
NM_152383	NM_030798	NM_004308	NM_004578	NM_020899	NM_006902	NM_030905	NM_013382	NM_012459
NM_022493	NM_006559	NM_001743	NM_001018073	NM_000876	NM_001018	NM_016183	NM_181885	NM_001007271
NM_018717	NM_031476	NM_005346	NM_014292	NM_022087	NM_016328	NM_032239	NM_001636	NM_018467
NM_181786	NM_006999	NM_032558	NM_032049	NM_021626	NM_001009905	NM_018215	NM_001005922	NM_199163
NM_001024213	NM_022492	NM_003168	NM_024107	NM_181836	NM_002920	NM_001029896	NM_032302	NM_025267
NM_000496	NM_013232	NM_002267	NM_005188	NM_032906	NM_173589	NM_007189	NM_014297	NM_016074
NM_018378	NM_001343	NM_002752	NM_004674	NM_002526	NM_148675	NM_015488	NM_032366	NM_002162
NM_014211	NM_001001661	NM_037370	NM_020765	NM_002293	NM_024827	NM_032262	NM_080659	NM_003021
NM_020787	NM_004892	NM_001008910	NM_024874	NM_006520	NM_182516	NM_144772	NM_145806	NM_015895
NM_001002236	NM_005932	NM_006990	NM_014556	NM_006570	NM_181837	NM_001013436	NM_003861	NM_002528
NM_004381	NM_207376	NM_001010867	NM_144692	NM_080737	NM_152286	NM_052998	NM_199163	NM_025065
NM_014234	NM_002350	NM_014970	NM_003724	NM_199511	NM_206898	NM_012289	NM_001541	NM_033177
NM_145654	NM_016644	NM_016080	NM_014444	NM_003945	NM_032177	NM_004354	NM_020442	NM_005468
NM_022912	NM_138565	NM_014292	NM_001008218	NM_005707	NM_016406	NM_001001699	NM_001919	NM_203456
NM_001018136	NM_032637	NM_000138	NM_001908	NM_018294	NM_021226	NM_033112	NM_198055	NM_001018068
NM_058190	NM_002087	NM_005370	NM_002147	NM_016546	NM_001866	NM_024537	NM_206834	NM_015045
NM_012222	NM_007372	NM_015352	NM_005657	NM_001618	NM_005773	NM_178225	NM_014060	NM_013238
NM_173859	NM_018206	NM_024728	NM_022131	NM_005920	NM_012200	NM_024042	NM_206919	NM_024710
NM_001010860	NM_002785	NM_152396	NM_145648	NM_144573	NM_016053	NM_014501	NM_207485	NM_152732
NM_030573	NM_007085	NM_004075	NM_145056	NM_000090	NM_019051	NM_030567	NM_004991	NM_022782
NM_014182	NM_016090	NM_006207	NM_018064	NM_001005861	NM_013342	NM_018344	NM_052959	NM_002461
NM_006339	NM_017582	NM_032857	NM_032320	NM_022170	NM_001389	NM_001001656	NM_017688	NM_016116
NM_199249	NM_000240	NM_006052	NM_007073	NM_021646	NM_130844	NM_001348	NM_001013690	NM_022156
NM_017814	NM_007219	NM_000158	NM_004715	NM_005789	NM_003325	NM_002412	NM_138448	NM_002943
NM_145109	NM_019605	NM_199512	NM_016128	NM_001664	NM_005045	NM_012313	NM_004045	NM_203411
NM_032309	NM_003620	NM_001010862	NM_001013615	NM_018054	NM_080749	NM_015448	NM_032024	NM_001001660
NM_033363	NM_014604	NM_000126	NM_002158	NM_006724	NM_021964	NM_003721	NM_001013703	NM_014285
NM_148676	NM_004168	NM_001024649	NM_019590	NM_003626	NM_021005	NM_004001	NM_003470	NM_032390
NM_145731	NM_001010924	NM_001008541	NM_004689	NM_005678	NM_172097	NM_004566	NM_022805	NM_018473
NM_012429	NM_003139	NM_022074	NM_001002799	NM_018386	NM_006047	NM_015896	NM_181719	NM_001216
NM_032630	NM_172169	NM_005606	NM_003433	NM_001003810	NM_015014	NM_001436	NM_001007157	NM_005594
NM_153347	NM_002293	NM_004663	NM_015322	NM_004674	NM_018473	NM_003541	NM_006333	NM_001898
NM_001307	NM_001015047	NM_015999	NM_013239	NM_021035	NM_003510	NM_080759	NM_032682	NM_001005162
NM_000294	NM_198189	NM_001018108	NM_007106	NM_004739	NM_032930	NM_014419	NM_032111	NM_053000
NM_004545	NM_025164	NM_032102	NM_001235	NM_015702	NM_000257	NM_016931	NM_053044	NM_020715
NM_004887	NM_001995	NM_015161	NM_020899	NM_003999	NM_001097	NM_002243	NM_030768	NM_002208
NM_001033551	NM_003567	NM_020421	NM_016248	NM_031953	NM_024650	NM_015683	NM_004750	NM_017913
NM_014468	NM_020216	NM_005742	NM_004663	NM_018660	NM_147184	NM_033666	NM_198398	NM_016021
NM_000737	NM_016433	NM_004096	NM_080621	NM_012197	NM_053017	NM_032937	NM_003847	NM_181825
NM_145315	NM_001018000	NM_207113	NM_080911	NM_080805	NM_203495	NM_015944	NM_006305	NM_022165
NM_001012337	NM_007236	NM_006621	NM_057164	NM_152538	NM_016126	NM_033199	NM_017775	NM_033649
NM_006072	NM_016238	NM_003009	NM_080653	NM_004718	NM_032796	NM_145806	NM_007210	NM_018694
NM_153487	NM_080927	NM_019035	NM_006472	NM_006502	NM_022141	NM_033504	NM_172016	NM_014616
NM_000061	NM_014876	NM_006322	NM_080599	NM_015634	NM_001311	NM_002206	NM_173537	NM_177533
NM_052945	NM_015544	NM_030810	NM_032325	NM_005354	NM_052988	NM_017878	NM_020535	NM_005869
NM_020407	NM_016022	NM_025164	NM_030629	NM_021102	NM_000894	NM_032890	NM_004761	NM_001025436
NM_000106	NM_020422	NM_015702	NM_002145	NM_001004019	NM_016500	NM_015703	NM_003812	NM_019051
NM_175063	NM_033121	NM_001321	NM_016545	NM_004396	NM_002466	NM_007268	NM_173859	NM_138442
NM_197964	NM_153693	NM_020448	NM_001570	NM_002539	NM_015969	NM_007295	NM_002905	NM_017812
NM_001013663	NM_006591	NM_032181	NM_014933	NM_030629	NM_194428	NM_017830	NM_006680	NM_138720
NM_080590	NM_133635	NM_006307	NM_015252	NM_000527	NM_001015882	NM_174922	NM_005879	NM_014187
NM_182589	NM_014344	NM_020825	NM_022818	NM_020820	NM_022369	NM_148980	NM_015072	NM_145731
NM_030626	NM_025125	NM_001007069	NM_004862	NM_004661	NM_001323	NM_022767	NM_003986	NM_152778
NM_022120	NM_003001	NM_015955	NM_006649	NM_002881	NM_005665	NM_032109	NM_006556	NM_030907
[truncated: 3,304 more rows]
